# Supplementary material for: Coordinated multiplexing of information about separate objects in visual cortex
Source: eLife journal article supplement (doi:10.7554/elife.76452), 2022-10-24
Supplement: data1 [file cohen2_final_V1_filtered-ABspikes-correlations.xlsx]

## Sheet: sorting
exp_title	orientation_info	cell1	cell1_type	cell2	cell2_type	correlation	pvalue	comparison
BR130827TASK0002OUTPUT	C50A51_C50A92	1	Single	11	Single	0.103437	0.435622	1
BR130827TASK0002OUTPUT	C50A51_C50A92	1	Single	12	Single	-0.171584	0.193799	1
BR130827TASK0002OUTPUT	C50A51_C50A92	1	Single	14	Average	-0.042232	0.750796	1
BR130827TASK0002OUTPUT	C50A51_C50A92	1	Single	15	Single	-0.072727	0.584103	1
BR130827TASK0002OUTPUT	C50A51_C50A92	1	Single	2	Single	0.021313	0.872706	1
BR130827TASK0002OUTPUT	C50A51_C50A92	1	Single	3	Single	0.108125	0.414987	1
BR130827TASK0002OUTPUT	C50A51_C50A92	1	Single	33	Average	0.149857	0.257276	1
BR130827TASK0002OUTPUT	C50A51_C50A92	1	Single	34	Single	0.132102	0.318587	1
BR130827TASK0002OUTPUT	C50A51_C50A92	1	Single	35	Single	0.254482	0.05177	1
BR130827TASK0002OUTPUT	C50A51_C50A92	1	Single	36	Average	0.159968	0.22618	1
BR130827TASK0002OUTPUT	C50A51_C50A92	1	Single	37	Average	0.051078	0.703369	1
BR130827TASK0002OUTPUT	C50A51_C50A92	1	Single	38	Average	0.27055	0.0382194	1
BR130827TASK0002OUTPUT	C50A51_C50A92	1	Single	4	Single	0.111087	0.402246	1
BR130827TASK0002OUTPUT	C50A51_C50A92	1	Single	41	Single	-0.136026	0.304296	2
BR130827TASK0002OUTPUT	C50A51_C50A92	1	Single	42	Single	-0.22077	0.0929012	2
BR130827TASK0002OUTPUT	C50A51_C50A92	1	Single	43	Average	-0.241095	0.0658415	2
BR130827TASK0002OUTPUT	C50A51_C50A92	1	Single	44	Average	0.137723	0.298247	2
BR130827TASK0002OUTPUT	C50A51_C50A92	1	Single	46	Single	-0.115804	0.382436	2
BR130827TASK0002OUTPUT	C50A51_C50A92	1	Single	47	Single	0.331568	0.0103073	2
BR130827TASK0002OUTPUT	C50A51_C50A92	1	Single	48	Average	-0.094239	0.47773	2
BR130827TASK0002OUTPUT	C50A51_C50A92	1	Single	49	Average	0.233668	0.0748831	2
BR130827TASK0002OUTPUT	C50A51_C50A92	1	Single	50	Single	0.016046	0.904842	2
BR130827TASK0002OUTPUT	C50A51_C50A92	1	Single	52	Average	0.041532	0.754797	2
BR130827TASK0002OUTPUT	C50A51_C50A92	1	Single	53	Single	0.010625	0.936905	2
BR130827TASK0002OUTPUT	C50A51_C50A92	1	Single	54	Average	-0.113883	0.394659	2
BR130827TASK0002OUTPUT	C50A51_C50A92	1	Single	55	Single	-0.010021	0.939953	2
BR130827TASK0002OUTPUT	C50A51_C50A92	1	Single	56	Average	-0.019138	0.886616	2
BR130827TASK0002OUTPUT	C50A51_C50A92	1	Single	6	Single	-0.234226	0.0741703	1
BR130827TASK0002OUTPUT	C50A51_C50A92	1	Single	65	Single	0.154374	0.247257	1
BR130827TASK0002OUTPUT	C50A51_C50A92	1	Single	66	Single	0.151349	0.252513	1
BR130827TASK0002OUTPUT	C50A51_C50A92	1	Single	7	Single	0.129759	0.331639	1
BR130827TASK0002OUTPUT	C50A51_C50A92	1	Single	77	Average	-0.047224	0.722462	2
BR130827TASK0002OUTPUT	C50A51_C50A92	1	Single	8	Average	-0.206678	0.116283	1
BR130827TASK0002OUTPUT	C50A51_C50A92	1	Single	80	Single	0.11139	0.400957	1
BR130827TASK0002OUTPUT	C50A51_C50A92	1	Single	81	Single	0.022201	0.86745	2
BR130827TASK0002OUTPUT	C50A51_C50A92	1	Single	85	Single	-0.14322	0.279187	2
BR130827TASK0002OUTPUT	C50A51_C50A92	11	Single	12	Single	0.166615	0.207219	1
BR130827TASK0002OUTPUT	C50A51_C50A92	11	Single	14	Average	-0.174573	0.186031	1
BR130827TASK0002OUTPUT	C50A51_C50A92	11	Single	15	Single	-0.207092	0.115538	1
BR130827TASK0002OUTPUT	C50A51_C50A92	11	Single	2	Single	-0.069067	0.603215	1
BR130827TASK0002OUTPUT	C50A51_C50A92	11	Single	3	Single	-0.053638	0.686596	1
BR130827TASK0002OUTPUT	C50A51_C50A92	11	Single	33	Average	0.023868	0.857595	1
BR130827TASK0002OUTPUT	C50A51_C50A92	11	Single	34	Single	0.15265	0.248412	1
BR130827TASK0002OUTPUT	C50A51_C50A92	11	Single	35	Single	-0.034149	0.797361	1
BR130827TASK0002OUTPUT	C50A51_C50A92	11	Single	36	Average	-0.221672	0.0915409	1
BR130827TASK0002OUTPUT	C50A51_C50A92	11	Single	37	Average	0.017488	0.896333	1
BR130827TASK0002OUTPUT	C50A51_C50A92	11	Single	38	Average	0.149598	0.258107	1
BR130827TASK0002OUTPUT	C50A51_C50A92	11	Single	4	Single	0.099001	0.455664	1
BR130827TASK0002OUTPUT	C50A51_C50A92	11	Single	41	Single	-0.056727	0.669563	2
BR130827TASK0002OUTPUT	C50A51_C50A92	11	Single	42	Single	-0.190365	0.148688	2
BR130827TASK0002OUTPUT	C50A51_C50A92	11	Single	43	Average	0.004133	0.975216	2
BR130827TASK0002OUTPUT	C50A51_C50A92	11	Single	44	Average	-0.052599	0.692364	2
BR130827TASK0002OUTPUT	C50A51_C50A92	11	Single	46	Single	-0.259069	0.0475535	2
BR130827TASK0002OUTPUT	C50A51_C50A92	11	Single	47	Single	0.080238	0.545772	2
BR130827TASK0002OUTPUT	C50A51_C50A92	11	Single	48	Average	-0.007229	0.956664	2
BR130827TASK0002OUTPUT	C50A51_C50A92	11	Single	49	Average	-0.066385	0.617387	2
BR130827TASK0002OUTPUT	C50A51_C50A92	11	Single	50	Single	0.228689	0.0842221	2
BR130827TASK0002OUTPUT	C50A51_C50A92	11	Single	52	Average	-0.004691	0.971873	2
BR130827TASK0002OUTPUT	C50A51_C50A92	11	Single	53	Single	-0.07974	0.551834	2
BR130827TASK0002OUTPUT	C50A51_C50A92	11	Single	54	Average	-0.07916	0.55474	2
BR130827TASK0002OUTPUT	C50A51_C50A92	11	Single	55	Single	-0.041189	0.756759	2
BR130827TASK0002OUTPUT	C50A51_C50A92	11	Single	56	Average	0.053777	0.688474	2
BR130827TASK0002OUTPUT	C50A51_C50A92	11	Single	6	Single	0.157683	0.232966	1
BR130827TASK0002OUTPUT	C50A51_C50A92	11	Single	65	Single	-0.122567	0.35936	1
BR130827TASK0002OUTPUT	C50A51_C50A92	11	Single	66	Single	0.257068	0.049357	1
BR130827TASK0002OUTPUT	C50A51_C50A92	11	Single	7	Single	0.022156	0.868879	1
BR130827TASK0002OUTPUT	C50A51_C50A92	11	Single	77	Average	-0.117364	0.376012	2
BR130827TASK0002OUTPUT	C50A51_C50A92	11	Single	8	Average	-0.194122	0.140689	1
BR130827TASK0002OUTPUT	C50A51_C50A92	11	Single	80	Single	-0.094227	0.477785	1
BR130827TASK0002OUTPUT	C50A51_C50A92	11	Single	81	Single	-0.031758	0.811279	2
BR130827TASK0002OUTPUT	C50A51_C50A92	11	Single	85	Single	0.216906	0.0989125	2
BR130827TASK0002OUTPUT	C50A51_C50A92	12	Single	14	Average	-0.046623	0.725856	1
BR130827TASK0002OUTPUT	C50A51_C50A92	12	Single	15	Single	-0.232655	0.0761882	1
BR130827TASK0002OUTPUT	C50A51_C50A92	12	Single	2	Single	-0.047688	0.719848	1
BR130827TASK0002OUTPUT	C50A51_C50A92	12	Single	3	Single	-0.020453	0.8778	1
BR130827TASK0002OUTPUT	C50A51_C50A92	12	Single	33	Average	0.105322	0.427254	1
BR130827TASK0002OUTPUT	C50A51_C50A92	12	Single	34	Single	-0.148913	0.260319	1
BR130827TASK0002OUTPUT	C50A51_C50A92	12	Single	35	Single	0.1033	0.436233	1
BR130827TASK0002OUTPUT	C50A51_C50A92	12	Single	36	Average	-0.120651	0.362698	1
BR130827TASK0002OUTPUT	C50A51_C50A92	12	Single	37	Average	0.162214	0.223768	1
BR130827TASK0002OUTPUT	C50A51_C50A92	12	Single	38	Average	0.119982	0.365381	1
BR130827TASK0002OUTPUT	C50A51_C50A92	12	Single	4	Single	0.13858	0.29522	1
BR130827TASK0002OUTPUT	C50A51_C50A92	12	Single	41	Single	0.151165	0.253096	2
BR130827TASK0002OUTPUT	C50A51_C50A92	12	Single	42	Single	0.203401	0.122316	2
BR130827TASK0002OUTPUT	C50A51_C50A92	12	Single	43	Average	0.21098	0.108713	2
BR130827TASK0002OUTPUT	C50A51_C50A92	12	Single	44	Average	0.152117	0.250085	2
BR130827TASK0002OUTPUT	C50A51_C50A92	12	Single	46	Single	-0.00685	0.958937	2
BR130827TASK0002OUTPUT	C50A51_C50A92	12	Single	47	Single	0.083587	0.529082	2
BR130827TASK0002OUTPUT	C50A51_C50A92	12	Single	48	Average	0.181312	0.169346	2
BR130827TASK0002OUTPUT	C50A51_C50A92	12	Single	49	Average	0.003289	0.980275	2
BR130827TASK0002OUTPUT	C50A51_C50A92	12	Single	50	Single	0.087637	0.513014	2
BR130827TASK0002OUTPUT	C50A51_C50A92	12	Single	52	Average	0.046924	0.724155	2
BR130827TASK0002OUTPUT	C50A51_C50A92	12	Single	53	Single	-0.175954	0.186438	2
BR130827TASK0002OUTPUT	C50A51_C50A92	12	Single	54	Average	0.029489	0.826072	2
BR130827TASK0002OUTPUT	C50A51_C50A92	12	Single	55	Single	-0.026972	0.839305	2
BR130827TASK0002OUTPUT	C50A51_C50A92	12	Single	56	Average	0.161773	0.225047	2
BR130827TASK0002OUTPUT	C50A51_C50A92	12	Single	6	Single	0.063709	0.631672	1
BR130827TASK0002OUTPUT	C50A51_C50A92	12	Single	65	Single	0.14671	0.271792	1
BR130827TASK0002OUTPUT	C50A51_C50A92	12	Single	66	Single	0.073837	0.578362	1
BR130827TASK0002OUTPUT	C50A51_C50A92	12	Single	7	Single	0.030271	0.821535	1
BR130827TASK0002OUTPUT	C50A51_C50A92	12	Single	77	Average	-0.130822	0.323342	2
BR130827TASK0002OUTPUT	C50A51_C50A92	12	Single	8	Average	0.062309	0.639197	1
BR130827TASK0002OUTPUT	C50A51_C50A92	12	Single	80	Single	-0.278255	0.0328488	1
BR130827TASK0002OUTPUT	C50A51_C50A92	12	Single	81	Single	0.129672	0.327648	2
BR130827TASK0002OUTPUT	C50A51_C50A92	12	Single	85	Single	0.259862	0.0468533	2
BR130827TASK0002OUTPUT	C50A51_C50A92	14	Average	15	Single	0.076066	0.566915	1
BR130827TASK0002OUTPUT	C50A51_C50A92	14	Average	2	Single	-0.115827	0.382339	1
BR130827TASK0002OUTPUT	C50A51_C50A92	14	Average	3	Single	-0.065036	0.624574	1
BR130827TASK0002OUTPUT	C50A51_C50A92	14	Average	33	Average	-0.144335	0.275423	1
BR130827TASK0002OUTPUT	C50A51_C50A92	14	Average	34	Single	-0.374952	0.00343347	1
BR130827TASK0002OUTPUT	C50A51_C50A92	14	Average	35	Single	-0.093704	0.480244	1
BR130827TASK0002OUTPUT	C50A51_C50A92	14	Average	36	Average	0.110908	0.403011	1
BR130827TASK0002OUTPUT	C50A51_C50A92	14	Average	37	Average	-0.052583	0.69505	1
BR130827TASK0002OUTPUT	C50A51_C50A92	14	Average	38	Average	-0.055332	0.677234	1
BR130827TASK0002OUTPUT	C50A51_C50A92	14	Average	4	Single	-0.073978	0.577634	1
BR130827TASK0002OUTPUT	C50A51_C50A92	14	Average	41	Single	0.03958	0.765983	2
BR130827TASK0002OUTPUT	C50A51_C50A92	14	Average	42	Single	-0.132737	0.316248	2
BR130827TASK0002OUTPUT	C50A51_C50A92	14	Average	43	Average	-0.267621	0.0404433	2
BR130827TASK0002OUTPUT	C50A51_C50A92	14	Average	44	Average	0.032619	0.806261	2
BR130827TASK0002OUTPUT	C50A51_C50A92	14	Average	46	Single	-0.007181	0.95695	2
BR130827TASK0002OUTPUT	C50A51_C50A92	14	Average	47	Single	-0.105323	0.427253	2
BR130827TASK0002OUTPUT	C50A51_C50A92	14	Average	48	Average	0.083972	0.527179	2
BR130827TASK0002OUTPUT	C50A51_C50A92	14	Average	49	Average	-0.036437	0.784099	2
BR130827TASK0002OUTPUT	C50A51_C50A92	14	Average	50	Single	0.000365	0.997831	2
BR130827TASK0002OUTPUT	C50A51_C50A92	14	Average	52	Average	-0.059996	0.651712	2
BR130827TASK0002OUTPUT	C50A51_C50A92	14	Average	53	Single	0.065412	0.625661	2
BR130827TASK0002OUTPUT	C50A51_C50A92	14	Average	54	Average	-0.060345	0.652723	2
BR130827TASK0002OUTPUT	C50A51_C50A92	14	Average	55	Single	0.040068	0.763181	2
BR130827TASK0002OUTPUT	C50A51_C50A92	14	Average	56	Average	0.275639	0.0362365	2
BR130827TASK0002OUTPUT	C50A51_C50A92	14	Average	6	Single	0.025289	0.849211	1
BR130827TASK0002OUTPUT	C50A51_C50A92	14	Average	65	Single	0.08353	0.533031	1
BR130827TASK0002OUTPUT	C50A51_C50A92	14	Average	66	Single	-0.090875	0.493657	1
BR130827TASK0002OUTPUT	C50A51_C50A92	14	Average	7	Single	0.013697	0.918717	1
BR130827TASK0002OUTPUT	C50A51_C50A92	14	Average	77	Average	0.23712	0.0705644	2
BR130827TASK0002OUTPUT	C50A51_C50A92	14	Average	8	Average	-0.019549	0.883162	1
BR130827TASK0002OUTPUT	C50A51_C50A92	14	Average	80	Single	0.033581	0.800658	1
BR130827TASK0002OUTPUT	C50A51_C50A92	14	Average	81	Single	-0.034221	0.79694	2
BR130827TASK0002OUTPUT	C50A51_C50A92	14	Average	85	Single	-0.05944	0.654737	2
BR130827TASK0002OUTPUT	C50A51_C50A92	15	Single	2	Single	-0.087821	0.508347	1
BR130827TASK0002OUTPUT	C50A51_C50A92	15	Single	3	Single	0.028861	0.828215	1
BR130827TASK0002OUTPUT	C50A51_C50A92	15	Single	33	Average	0.051008	0.701226	1
BR130827TASK0002OUTPUT	C50A51_C50A92	15	Single	34	Single	-0.069352	0.601715	1
BR130827TASK0002OUTPUT	C50A51_C50A92	15	Single	35	Single	-0.011429	0.931536	1
BR130827TASK0002OUTPUT	C50A51_C50A92	15	Single	36	Average	0.311582	0.0162953	1
BR130827TASK0002OUTPUT	C50A51_C50A92	15	Single	37	Average	0.03306	0.805399	1
BR130827TASK0002OUTPUT	C50A51_C50A92	15	Single	38	Average	-0.034741	0.79392	1
BR130827TASK0002OUTPUT	C50A51_C50A92	15	Single	4	Single	0.028101	0.832677	1
BR130827TASK0002OUTPUT	C50A51_C50A92	15	Single	41	Single	-0.185547	0.159436	2
BR130827TASK0002OUTPUT	C50A51_C50A92	15	Single	42	Single	-0.23423	0.0741658	2
BR130827TASK0002OUTPUT	C50A51_C50A92	15	Single	43	Average	-0.126555	0.339508	2
BR130827TASK0002OUTPUT	C50A51_C50A92	15	Single	44	Average	-0.312534	0.0159541	2
BR130827TASK0002OUTPUT	C50A51_C50A92	15	Single	46	Single	0.20959	0.111117	2
BR130827TASK0002OUTPUT	C50A51_C50A92	15	Single	47	Single	-0.032604	0.806347	2
BR130827TASK0002OUTPUT	C50A51_C50A92	15	Single	48	Average	-0.038692	0.77109	2
BR130827TASK0002OUTPUT	C50A51_C50A92	15	Single	49	Average	0.086185	0.516312	2
BR130827TASK0002OUTPUT	C50A51_C50A92	15	Single	50	Single	-0.110851	0.407446	2
BR130827TASK0002OUTPUT	C50A51_C50A92	15	Single	52	Average	-0.001259	0.992447	2
BR130827TASK0002OUTPUT	C50A51_C50A92	15	Single	53	Single	0.169813	0.202527	2
BR130827TASK0002OUTPUT	C50A51_C50A92	15	Single	54	Average	-0.006872	0.959166	2
BR130827TASK0002OUTPUT	C50A51_C50A92	15	Single	55	Single	0.232642	0.0762052	2
BR130827TASK0002OUTPUT	C50A51_C50A92	15	Single	56	Average	0.005466	0.967519	2
BR130827TASK0002OUTPUT	C50A51_C50A92	15	Single	6	Single	-0.12298	0.353438	1
BR130827TASK0002OUTPUT	C50A51_C50A92	15	Single	65	Single	0.09612	0.472908	1
BR130827TASK0002OUTPUT	C50A51_C50A92	15	Single	66	Single	0.156738	0.235815	1
BR130827TASK0002OUTPUT	C50A51_C50A92	15	Single	7	Single	0.266678	0.0430159	1
BR130827TASK0002OUTPUT	C50A51_C50A92	15	Single	77	Average	-0.010749	0.935598	2
BR130827TASK0002OUTPUT	C50A51_C50A92	15	Single	8	Average	0.194547	0.139804	1
BR130827TASK0002OUTPUT	C50A51_C50A92	15	Single	80	Single	0.178126	0.177093	1
BR130827TASK0002OUTPUT	C50A51_C50A92	15	Single	81	Single	-0.018709	0.888151	2
BR130827TASK0002OUTPUT	C50A51_C50A92	15	Single	85	Single	-0.108376	0.4139	2
BR130827TASK0002OUTPUT	C50A51_C50A92	2	Single	3	Single	0.103046	0.437368	1
BR130827TASK0002OUTPUT	C50A51_C50A92	2	Single	33	Average	0.046678	0.725545	1
BR130827TASK0002OUTPUT	C50A51_C50A92	2	Single	34	Single	0.197643	0.133488	1
BR130827TASK0002OUTPUT	C50A51_C50A92	2	Single	35	Single	0.096215	0.468504	1
BR130827TASK0002OUTPUT	C50A51_C50A92	2	Single	36	Average	-0.092548	0.485702	1
BR130827TASK0002OUTPUT	C50A51_C50A92	2	Single	37	Average	-0.048619	0.717032	1
BR130827TASK0002OUTPUT	C50A51_C50A92	2	Single	38	Average	-0.09122	0.492009	1
BR130827TASK0002OUTPUT	C50A51_C50A92	2	Single	4	Single	0.232671	0.0761683	1
BR130827TASK0002OUTPUT	C50A51_C50A92	2	Single	41	Single	0.131881	0.319406	2
BR130827TASK0002OUTPUT	C50A51_C50A92	2	Single	42	Single	0.155975	0.238131	2
BR130827TASK0002OUTPUT	C50A51_C50A92	2	Single	43	Average	0.448779	0.000363832	2
BR130827TASK0002OUTPUT	C50A51_C50A92	2	Single	44	Average	-0.129244	0.329263	2
BR130827TASK0002OUTPUT	C50A51_C50A92	2	Single	46	Single	0.129266	0.329181	2
BR130827TASK0002OUTPUT	C50A51_C50A92	2	Single	47	Single	0.282804	0.0299845	2
BR130827TASK0002OUTPUT	C50A51_C50A92	2	Single	48	Average	-0.051358	0.699275	2
BR130827TASK0002OUTPUT	C50A51_C50A92	2	Single	49	Average	-0.031049	0.815414	2
BR130827TASK0002OUTPUT	C50A51_C50A92	2	Single	50	Single	-0.098274	0.463	2
BR130827TASK0002OUTPUT	C50A51_C50A92	2	Single	52	Average	-0.089513	0.500182	2
BR130827TASK0002OUTPUT	C50A51_C50A92	2	Single	53	Single	-0.11425	0.393127	2
BR130827TASK0002OUTPUT	C50A51_C50A92	2	Single	54	Average	0.095385	0.476313	2
BR130827TASK0002OUTPUT	C50A51_C50A92	2	Single	55	Single	0.000433	0.997406	2
BR130827TASK0002OUTPUT	C50A51_C50A92	2	Single	56	Average	-0.084521	0.528165	2
BR130827TASK0002OUTPUT	C50A51_C50A92	2	Single	6	Single	0.142019	0.283279	1
BR130827TASK0002OUTPUT	C50A51_C50A92	2	Single	65	Single	0.164781	0.216427	1
BR130827TASK0002OUTPUT	C50A51_C50A92	2	Single	66	Single	0.211236	0.108273	1
BR130827TASK0002OUTPUT	C50A51_C50A92	2	Single	7	Single	-0.120364	0.368127	1
BR130827TASK0002OUTPUT	C50A51_C50A92	2	Single	77	Average	0.146237	0.269079	2
BR130827TASK0002OUTPUT	C50A51_C50A92	2	Single	8	Average	0.203441	0.122241	1
BR130827TASK0002OUTPUT	C50A51_C50A92	2	Single	80	Single	-0.169831	0.198461	1
BR130827TASK0002OUTPUT	C50A51_C50A92	2	Single	81	Single	0.077983	0.557153	2
BR130827TASK0002OUTPUT	C50A51_C50A92	2	Single	85	Single	-0.032339	0.807891	2
BR130827TASK0002OUTPUT	C50A51_C50A92	3	Single	33	Average	-0.026181	0.843958	1
BR130827TASK0002OUTPUT	C50A51_C50A92	3	Single	34	Single	0.144277	0.275619	1
BR130827TASK0002OUTPUT	C50A51_C50A92	3	Single	35	Single	0.228991	0.0810646	1
BR130827TASK0002OUTPUT	C50A51_C50A92	3	Single	36	Average	-0.016727	0.899934	1
BR130827TASK0002OUTPUT	C50A51_C50A92	3	Single	37	Average	0.172336	0.195801	1
BR130827TASK0002OUTPUT	C50A51_C50A92	3	Single	38	Average	-0.070701	0.594648	1
BR130827TASK0002OUTPUT	C50A51_C50A92	3	Single	4	Single	0.285832	0.0281959	1
BR130827TASK0002OUTPUT	C50A51_C50A92	3	Single	41	Single	0.003873	0.976772	2
BR130827TASK0002OUTPUT	C50A51_C50A92	3	Single	42	Single	0.012028	0.927957	2
BR130827TASK0002OUTPUT	C50A51_C50A92	3	Single	43	Average	0.289156	0.0263367	2
BR130827TASK0002OUTPUT	C50A51_C50A92	3	Single	44	Average	0.041714	0.753755	2
BR130827TASK0002OUTPUT	C50A51_C50A92	3	Single	46	Single	0.046729	0.725256	2
BR130827TASK0002OUTPUT	C50A51_C50A92	3	Single	47	Single	-0.01355	0.918871	2
BR130827TASK0002OUTPUT	C50A51_C50A92	3	Single	48	Average	-0.124411	0.347821	2
BR130827TASK0002OUTPUT	C50A51_C50A92	3	Single	49	Average	-0.036424	0.784173	2
BR130827TASK0002OUTPUT	C50A51_C50A92	3	Single	50	Single	-0.25362	0.0547312	2
BR130827TASK0002OUTPUT	C50A51_C50A92	3	Single	52	Average	-0.262215	0.044827	2
BR130827TASK0002OUTPUT	C50A51_C50A92	3	Single	53	Single	-0.212509	0.109258	2
BR130827TASK0002OUTPUT	C50A51_C50A92	3	Single	54	Average	-0.14494	0.27768	2
BR130827TASK0002OUTPUT	C50A51_C50A92	3	Single	55	Single	-0.09777	0.461315	2
BR130827TASK0002OUTPUT	C50A51_C50A92	3	Single	56	Average	-0.058605	0.662122	2
BR130827TASK0002OUTPUT	C50A51_C50A92	3	Single	6	Single	0.205145	0.119076	1
BR130827TASK0002OUTPUT	C50A51_C50A92	3	Single	65	Single	0.174211	0.190908	1
BR130827TASK0002OUTPUT	C50A51_C50A92	3	Single	66	Single	0.423101	0.000841824	1
BR130827TASK0002OUTPUT	C50A51_C50A92	3	Single	7	Single	0.18152	0.172669	1
BR130827TASK0002OUTPUT	C50A51_C50A92	3	Single	77	Average	-0.143722	0.277487	2
BR130827TASK0002OUTPUT	C50A51_C50A92	3	Single	8	Average	0.200857	0.127161	1
BR130827TASK0002OUTPUT	C50A51_C50A92	3	Single	80	Single	-0.026554	0.841763	1
BR130827TASK0002OUTPUT	C50A51_C50A92	3	Single	81	Single	-0.211477	0.107863	2
BR130827TASK0002OUTPUT	C50A51_C50A92	3	Single	85	Single	-0.019739	0.882033	2
BR130827TASK0002OUTPUT	C50A51_C50A92	33	Average	34	Single	0.303965	0.0192569	1
BR130827TASK0002OUTPUT	C50A51_C50A92	33	Average	35	Single	0.474975	0.00014404	1
BR130827TASK0002OUTPUT	C50A51_C50A92	33	Average	36	Average	0.330748	0.0105089	1
BR130827TASK0002OUTPUT	C50A51_C50A92	33	Average	37	Average	0.151766	0.25543	1
BR130827TASK0002OUTPUT	C50A51_C50A92	33	Average	38	Average	0.444233	0.000424127	1
BR130827TASK0002OUTPUT	C50A51_C50A92	33	Average	4	Single	0.204493	0.12028	1
BR130827TASK0002OUTPUT	C50A51_C50A92	33	Average	41	Single	-0.185426	0.159714	2
BR130827TASK0002OUTPUT	C50A51_C50A92	33	Average	42	Single	-0.286773	0.0276587	2
BR130827TASK0002OUTPUT	C50A51_C50A92	33	Average	43	Average	-0.174107	0.187227	2
BR130827TASK0002OUTPUT	C50A51_C50A92	33	Average	44	Average	-0.155529	0.239494	2
BR130827TASK0002OUTPUT	C50A51_C50A92	33	Average	46	Single	0.220775	0.092894	2
BR130827TASK0002OUTPUT	C50A51_C50A92	33	Average	47	Single	0.211427	0.107948	2
BR130827TASK0002OUTPUT	C50A51_C50A92	33	Average	48	Average	0.193785	0.141394	2
BR130827TASK0002OUTPUT	C50A51_C50A92	33	Average	49	Average	0.385818	0.00254534	2
BR130827TASK0002OUTPUT	C50A51_C50A92	33	Average	50	Single	0.142163	0.287089	2
BR130827TASK0002OUTPUT	C50A51_C50A92	33	Average	52	Average	-0.114796	0.38662	2
BR130827TASK0002OUTPUT	C50A51_C50A92	33	Average	53	Single	-0.158062	0.236006	2
BR130827TASK0002OUTPUT	C50A51_C50A92	33	Average	54	Average	0.138755	0.298918	2
BR130827TASK0002OUTPUT	C50A51_C50A92	33	Average	55	Single	0.244407	0.0621025	2
BR130827TASK0002OUTPUT	C50A51_C50A92	33	Average	56	Average	0.087555	0.513406	2
BR130827TASK0002OUTPUT	C50A51_C50A92	33	Average	6	Single	-0.011399	0.931715	1
BR130827TASK0002OUTPUT	C50A51_C50A92	33	Average	65	Single	0.097948	0.464491	1
BR130827TASK0002OUTPUT	C50A51_C50A92	33	Average	66	Single	0.000886	0.994683	1
BR130827TASK0002OUTPUT	C50A51_C50A92	33	Average	7	Single	0.200348	0.131573	1
BR130827TASK0002OUTPUT	C50A51_C50A92	33	Average	77	Average	0.025493	0.848012	2
BR130827TASK0002OUTPUT	C50A51_C50A92	33	Average	8	Average	0.139312	0.292651	1
BR130827TASK0002OUTPUT	C50A51_C50A92	33	Average	80	Single	0.004658	0.972066	1
BR130827TASK0002OUTPUT	C50A51_C50A92	33	Average	81	Single	0.114029	0.38982	2
BR130827TASK0002OUTPUT	C50A51_C50A92	33	Average	85	Single	-0.083823	0.527916	2
BR130827TASK0002OUTPUT	C50A51_C50A92	34	Single	35	Single	0.337106	0.00903136	1
BR130827TASK0002OUTPUT	C50A51_C50A92	34	Single	36	Average	0.111619	0.399984	1
BR130827TASK0002OUTPUT	C50A51_C50A92	34	Single	37	Average	0.052258	0.69684	1
BR130827TASK0002OUTPUT	C50A51_C50A92	34	Single	38	Average	0.231119	0.0782038	1
BR130827TASK0002OUTPUT	C50A51_C50A92	34	Single	4	Single	0.255397	0.0509052	1
BR130827TASK0002OUTPUT	C50A51_C50A92	34	Single	41	Single	-0.024625	0.853126	2
BR130827TASK0002OUTPUT	C50A51_C50A92	34	Single	42	Single	0.01482	0.911293	2
BR130827TASK0002OUTPUT	C50A51_C50A92	34	Single	43	Average	0.076197	0.566244	2
BR130827TASK0002OUTPUT	C50A51_C50A92	34	Single	44	Average	-0.1879	0.154118	2
BR130827TASK0002OUTPUT	C50A51_C50A92	34	Single	46	Single	-0.12745	0.336075	2
BR130827TASK0002OUTPUT	C50A51_C50A92	34	Single	47	Single	0.162103	0.219964	2
BR130827TASK0002OUTPUT	C50A51_C50A92	34	Single	48	Average	-0.054234	0.683299	2
BR130827TASK0002OUTPUT	C50A51_C50A92	34	Single	49	Average	0.126667	0.339076	2
BR130827TASK0002OUTPUT	C50A51_C50A92	34	Single	50	Single	0.180199	0.175868	2
BR130827TASK0002OUTPUT	C50A51_C50A92	34	Single	52	Average	-0.066612	0.616184	2
BR130827TASK0002OUTPUT	C50A51_C50A92	34	Single	53	Single	-0.029655	0.825111	2
BR130827TASK0002OUTPUT	C50A51_C50A92	34	Single	54	Average	-0.076925	0.566008	2
BR130827TASK0002OUTPUT	C50A51_C50A92	34	Single	55	Single	-0.120324	0.364009	2
BR130827TASK0002OUTPUT	C50A51_C50A92	34	Single	56	Average	-0.261116	0.0477258	2
BR130827TASK0002OUTPUT	C50A51_C50A92	34	Single	6	Single	0.241775	0.06506	1
BR130827TASK0002OUTPUT	C50A51_C50A92	34	Single	65	Single	0.385177	0.0028294	1
BR130827TASK0002OUTPUT	C50A51_C50A92	34	Single	66	Single	0.087944	0.507751	1
BR130827TASK0002OUTPUT	C50A51_C50A92	34	Single	7	Single	-0.140579	0.292549	1
BR130827TASK0002OUTPUT	C50A51_C50A92	34	Single	77	Average	0.080434	0.544789	2
BR130827TASK0002OUTPUT	C50A51_C50A92	34	Single	8	Average	0.2482	0.0580335	1
BR130827TASK0002OUTPUT	C50A51_C50A92	34	Single	80	Single	-0.014054	0.915863	1
BR130827TASK0002OUTPUT	C50A51_C50A92	34	Single	81	Single	-0.015049	0.909933	2
BR130827TASK0002OUTPUT	C50A51_C50A92	34	Single	85	Single	-0.093236	0.482447	2
BR130827TASK0002OUTPUT	C50A51_C50A92	35	Single	36	Average	0.367143	0.00423156	1
BR130827TASK0002OUTPUT	C50A51_C50A92	35	Single	37	Average	0.407417	0.00150254	1
BR130827TASK0002OUTPUT	C50A51_C50A92	35	Single	38	Average	0.568277	2.66775e-06	1
BR130827TASK0002OUTPUT	C50A51_C50A92	35	Single	4	Single	0.343332	0.00776294	1
BR130827TASK0002OUTPUT	C50A51_C50A92	35	Single	41	Single	-0.421623	0.000881741	2
BR130827TASK0002OUTPUT	C50A51_C50A92	35	Single	42	Single	-0.224938	0.0867422	2
BR130827TASK0002OUTPUT	C50A51_C50A92	35	Single	43	Average	-0.161559	0.221534	2
BR130827TASK0002OUTPUT	C50A51_C50A92	35	Single	44	Average	-0.171534	0.193929	2
BR130827TASK0002OUTPUT	C50A51_C50A92	35	Single	46	Single	-0.137264	0.299874	2
BR130827TASK0002OUTPUT	C50A51_C50A92	35	Single	47	Single	0.240707	0.0662911	2
BR130827TASK0002OUTPUT	C50A51_C50A92	35	Single	48	Average	0.055914	0.674031	2
BR130827TASK0002OUTPUT	C50A51_C50A92	35	Single	49	Average	0.364162	0.00457686	2
BR130827TASK0002OUTPUT	C50A51_C50A92	35	Single	50	Single	0.039343	0.769354	2
BR130827TASK0002OUTPUT	C50A51_C50A92	35	Single	52	Average	0.145167	0.272636	2
BR130827TASK0002OUTPUT	C50A51_C50A92	35	Single	53	Single	-0.106085	0.428029	2
BR130827TASK0002OUTPUT	C50A51_C50A92	35	Single	54	Average	-0.223543	0.0916387	2
BR130827TASK0002OUTPUT	C50A51_C50A92	35	Single	55	Single	0.09314	0.482901	2
BR130827TASK0002OUTPUT	C50A51_C50A92	35	Single	56	Average	-0.154763	0.246055	2
BR130827TASK0002OUTPUT	C50A51_C50A92	35	Single	6	Single	-0.049102	0.711894	1
BR130827TASK0002OUTPUT	C50A51_C50A92	35	Single	65	Single	0.131779	0.324105	1
BR130827TASK0002OUTPUT	C50A51_C50A92	35	Single	66	Single	0.12503	0.345407	1
BR130827TASK0002OUTPUT	C50A51_C50A92	35	Single	7	Single	0.115737	0.386954	1
BR130827TASK0002OUTPUT	C50A51_C50A92	35	Single	77	Average	0.06403	0.629951	2
BR130827TASK0002OUTPUT	C50A51_C50A92	35	Single	8	Average	0.14157	0.284821	1
BR130827TASK0002OUTPUT	C50A51_C50A92	35	Single	80	Single	0.242119	0.064667	1
BR130827TASK0002OUTPUT	C50A51_C50A92	35	Single	81	Single	-0.160015	0.226042	2
BR130827TASK0002OUTPUT	C50A51_C50A92	35	Single	85	Single	-0.175949	0.182532	2
BR130827TASK0002OUTPUT	C50A51_C50A92	36	Average	37	Average	0.333661	0.0104799	1
BR130827TASK0002OUTPUT	C50A51_C50A92	36	Average	38	Average	0.300477	0.020759	1
BR130827TASK0002OUTPUT	C50A51_C50A92	36	Average	4	Single	0.164568	0.212934	1
BR130827TASK0002OUTPUT	C50A51_C50A92	36	Average	41	Single	-0.228972	0.0810903	2
BR130827TASK0002OUTPUT	C50A51_C50A92	36	Average	42	Single	-0.347856	0.00694141	2
BR130827TASK0002OUTPUT	C50A51_C50A92	36	Average	43	Average	-0.292946	0.0243437	2
BR130827TASK0002OUTPUT	C50A51_C50A92	36	Average	44	Average	-0.103112	0.437074	2
BR130827TASK0002OUTPUT	C50A51_C50A92	36	Average	46	Single	0.228399	0.0818757	2
BR130827TASK0002OUTPUT	C50A51_C50A92	36	Average	47	Single	0.046576	0.726121	2
BR130827TASK0002OUTPUT	C50A51_C50A92	36	Average	48	Average	-0.093086	0.483158	2
BR130827TASK0002OUTPUT	C50A51_C50A92	36	Average	49	Average	0.157852	0.232461	2
BR130827TASK0002OUTPUT	C50A51_C50A92	36	Average	50	Single	-0.065114	0.627243	2
BR130827TASK0002OUTPUT	C50A51_C50A92	36	Average	52	Average	0.168255	0.20272	2
BR130827TASK0002OUTPUT	C50A51_C50A92	36	Average	53	Single	-0.055767	0.677568	2
BR130827TASK0002OUTPUT	C50A51_C50A92	36	Average	54	Average	0.058012	0.665338	2
BR130827TASK0002OUTPUT	C50A51_C50A92	36	Average	55	Single	0.263847	0.0434643	2
BR130827TASK0002OUTPUT	C50A51_C50A92	36	Average	56	Average	-0.133967	0.316063	2
BR130827TASK0002OUTPUT	C50A51_C50A92	36	Average	6	Single	-0.091201	0.492098	1
BR130827TASK0002OUTPUT	C50A51_C50A92	36	Average	65	Single	0.062377	0.641817	1
BR130827TASK0002OUTPUT	C50A51_C50A92	36	Average	66	Single	0.02329	0.861009	1
BR130827TASK0002OUTPUT	C50A51_C50A92	36	Average	7	Single	0.387533	0.00265127	1
BR130827TASK0002OUTPUT	C50A51_C50A92	36	Average	77	Average	-0.014546	0.91293	2
BR130827TASK0002OUTPUT	C50A51_C50A92	36	Average	8	Average	0.220575	0.0931973	1
BR130827TASK0002OUTPUT	C50A51_C50A92	36	Average	80	Single	0.230978	0.078391	1
BR130827TASK0002OUTPUT	C50A51_C50A92	36	Average	81	Single	-0.011279	0.932433	2
BR130827TASK0002OUTPUT	C50A51_C50A92	36	Average	85	Single	-0.005187	0.968901	2
BR130827TASK0002OUTPUT	C50A51_C50A92	37	Average	38	Average	0.465956	0.000227668	1
BR130827TASK0002OUTPUT	C50A51_C50A92	37	Average	4	Single	0.129143	0.333962	1
BR130827TASK0002OUTPUT	C50A51_C50A92	37	Average	41	Single	-0.101324	0.449161	2
BR130827TASK0002OUTPUT	C50A51_C50A92	37	Average	42	Single	-0.236726	0.0735938	2
BR130827TASK0002OUTPUT	C50A51_C50A92	37	Average	43	Average	-0.04662	0.728208	2
BR130827TASK0002OUTPUT	C50A51_C50A92	37	Average	44	Average	0.030119	0.822415	2
BR130827TASK0002OUTPUT	C50A51_C50A92	37	Average	46	Single	0.056504	0.673542	2
BR130827TASK0002OUTPUT	C50A51_C50A92	37	Average	47	Single	0.166484	0.211648	2
BR130827TASK0002OUTPUT	C50A51_C50A92	37	Average	48	Average	0.078144	0.559851	2
BR130827TASK0002OUTPUT	C50A51_C50A92	37	Average	49	Average	0.280285	0.0330862	2
BR130827TASK0002OUTPUT	C50A51_C50A92	37	Average	50	Single	-0.100869	0.455318	2
BR130827TASK0002OUTPUT	C50A51_C50A92	37	Average	52	Average	-0.167613	0.208524	2
BR130827TASK0002OUTPUT	C50A51_C50A92	37	Average	53	Single	-0.268034	0.0438177	2
BR130827TASK0002OUTPUT	C50A51_C50A92	37	Average	54	Average	-0.076332	0.572517	2
BR130827TASK0002OUTPUT	C50A51_C50A92	37	Average	55	Single	0.088134	0.510614	2
BR130827TASK0002OUTPUT	C50A51_C50A92	37	Average	56	Average	-0.069749	0.606165	2
BR130827TASK0002OUTPUT	C50A51_C50A92	37	Average	6	Single	-0.033126	0.805018	1
BR130827TASK0002OUTPUT	C50A51_C50A92	37	Average	65	Single	-0.122773	0.362911	1
BR130827TASK0002OUTPUT	C50A51_C50A92	37	Average	66	Single	0.245118	0.0636636	1
BR130827TASK0002OUTPUT	C50A51_C50A92	37	Average	7	Single	0.177588	0.186306	1
BR130827TASK0002OUTPUT	C50A51_C50A92	37	Average	77	Average	-0.008983	0.946645	2
BR130827TASK0002OUTPUT	C50A51_C50A92	37	Average	8	Average	-0.069044	0.606557	1
BR130827TASK0002OUTPUT	C50A51_C50A92	37	Average	80	Single	0.035579	0.790897	1
BR130827TASK0002OUTPUT	C50A51_C50A92	37	Average	81	Single	-0.125741	0.346957	2
BR130827TASK0002OUTPUT	C50A51_C50A92	37	Average	85	Single	-0.106908	0.424431	2
BR130827TASK0002OUTPUT	C50A51_C50A92	38	Average	4	Single	0.044329	0.738849	1
BR130827TASK0002OUTPUT	C50A51_C50A92	38	Average	41	Single	-0.306091	0.0183876	2
BR130827TASK0002OUTPUT	C50A51_C50A92	38	Average	42	Single	-0.250715	0.0554563	2
BR130827TASK0002OUTPUT	C50A51_C50A92	38	Average	43	Average	-0.088162	0.506698	2
BR130827TASK0002OUTPUT	C50A51_C50A92	38	Average	44	Average	0.048505	0.715251	2
BR130827TASK0002OUTPUT	C50A51_C50A92	38	Average	46	Single	-0.084743	0.52338	2
BR130827TASK0002OUTPUT	C50A51_C50A92	38	Average	47	Single	0.249881	0.0562998	2
BR130827TASK0002OUTPUT	C50A51_C50A92	38	Average	48	Average	0.145078	0.272932	2
BR130827TASK0002OUTPUT	C50A51_C50A92	38	Average	49	Average	0.446425	0.000394012	2
BR130827TASK0002OUTPUT	C50A51_C50A92	38	Average	50	Single	0.186661	0.16062	2
BR130827TASK0002OUTPUT	C50A51_C50A92	38	Average	52	Average	0.091812	0.489193	2
BR130827TASK0002OUTPUT	C50A51_C50A92	38	Average	53	Single	-0.142392	0.286304	2
BR130827TASK0002OUTPUT	C50A51_C50A92	38	Average	54	Average	0.157833	0.236694	2
BR130827TASK0002OUTPUT	C50A51_C50A92	38	Average	55	Single	0.120859	0.361865	2
BR130827TASK0002OUTPUT	C50A51_C50A92	38	Average	56	Average	0.061321	0.647478	2
BR130827TASK0002OUTPUT	C50A51_C50A92	38	Average	6	Single	-0.137687	0.298372	1
BR130827TASK0002OUTPUT	C50A51_C50A92	38	Average	65	Single	0.139666	0.295725	1
BR130827TASK0002OUTPUT	C50A51_C50A92	38	Average	66	Single	-0.087929	0.507823	1
BR130827TASK0002OUTPUT	C50A51_C50A92	38	Average	7	Single	0.102078	0.445776	1
BR130827TASK0002OUTPUT	C50A51_C50A92	38	Average	77	Average	0.217897	0.0973435	2
BR130827TASK0002OUTPUT	C50A51_C50A92	38	Average	8	Average	-0.033277	0.802431	1
BR130827TASK0002OUTPUT	C50A51_C50A92	38	Average	80	Single	0.159702	0.226963	1
BR130827TASK0002OUTPUT	C50A51_C50A92	38	Average	81	Single	0.030108	0.820916	2
BR130827TASK0002OUTPUT	C50A51_C50A92	38	Average	85	Single	-0.134612	0.309399	2
BR130827TASK0002OUTPUT	C50A51_C50A92	4	Single	41	Single	-0.058632	0.659138	2
BR130827TASK0002OUTPUT	C50A51_C50A92	4	Single	42	Single	0.033734	0.799769	2
BR130827TASK0002OUTPUT	C50A51_C50A92	4	Single	43	Average	0.1217	0.358509	2
BR130827TASK0002OUTPUT	C50A51_C50A92	4	Single	44	Average	-0.13322	0.314475	2
BR130827TASK0002OUTPUT	C50A51_C50A92	4	Single	46	Single	0.080209	0.545918	2
BR130827TASK0002OUTPUT	C50A51_C50A92	4	Single	47	Single	0.133564	0.313212	2
BR130827TASK0002OUTPUT	C50A51_C50A92	4	Single	48	Average	-0.26508	0.0424572	2
BR130827TASK0002OUTPUT	C50A51_C50A92	4	Single	49	Average	0.097213	0.463883	2
BR130827TASK0002OUTPUT	C50A51_C50A92	4	Single	50	Single	-0.075406	0.573723	2
BR130827TASK0002OUTPUT	C50A51_C50A92	4	Single	52	Average	-0.202154	0.124674	2
BR130827TASK0002OUTPUT	C50A51_C50A92	4	Single	53	Single	-0.379141	0.00333507	2
BR130827TASK0002OUTPUT	C50A51_C50A92	4	Single	54	Average	-0.234163	0.0768607	2
BR130827TASK0002OUTPUT	C50A51_C50A92	4	Single	55	Single	-0.206262	0.117035	2
BR130827TASK0002OUTPUT	C50A51_C50A92	4	Single	56	Average	-0.092456	0.490021	2
BR130827TASK0002OUTPUT	C50A51_C50A92	4	Single	6	Single	0.142835	0.280494	1
BR130827TASK0002OUTPUT	C50A51_C50A92	4	Single	65	Single	0.084583	0.52786	1
BR130827TASK0002OUTPUT	C50A51_C50A92	4	Single	66	Single	0.2921	0.0247773	1
BR130827TASK0002OUTPUT	C50A51_C50A92	4	Single	7	Single	0.309231	0.0181777	1
BR130827TASK0002OUTPUT	C50A51_C50A92	4	Single	77	Average	-0.146324	0.268791	2
BR130827TASK0002OUTPUT	C50A51_C50A92	4	Single	8	Average	0.289312	0.0262522	1
BR130827TASK0002OUTPUT	C50A51_C50A92	4	Single	80	Single	-0.109885	0.40739	1
BR130827TASK0002OUTPUT	C50A51_C50A92	4	Single	81	Single	0.064511	0.627377	2
BR130827TASK0002OUTPUT	C50A51_C50A92	4	Single	85	Single	0.153252	0.246529	2
BR130827TASK0002OUTPUT	C50A51_C50A92	41	Single	42	Single	0.336515	0.00916061	1
BR130827TASK0002OUTPUT	C50A51_C50A92	41	Single	43	Average	0.317156	0.0143831	1
BR130827TASK0002OUTPUT	C50A51_C50A92	41	Single	44	Average	0.243638	0.0629554	1
BR130827TASK0002OUTPUT	C50A51_C50A92	41	Single	46	Single	0.173389	0.189081	1
BR130827TASK0002OUTPUT	C50A51_C50A92	41	Single	47	Single	-0.029877	0.822267	1
BR130827TASK0002OUTPUT	C50A51_C50A92	41	Single	48	Average	0.199978	0.128868	1
BR130827TASK0002OUTPUT	C50A51_C50A92	41	Single	49	Average	-0.262316	0.0447417	1
BR130827TASK0002OUTPUT	C50A51_C50A92	41	Single	50	Single	-0.175503	0.187589	1
BR130827TASK0002OUTPUT	C50A51_C50A92	41	Single	52	Average	-0.224073	0.0879925	1
BR130827TASK0002OUTPUT	C50A51_C50A92	41	Single	53	Single	-0.028222	0.833439	1
BR130827TASK0002OUTPUT	C50A51_C50A92	41	Single	54	Average	0.02939	0.826646	1
BR130827TASK0002OUTPUT	C50A51_C50A92	41	Single	55	Single	0.040868	0.758599	1
BR130827TASK0002OUTPUT	C50A51_C50A92	41	Single	56	Average	0.02115	0.874784	1
BR130827TASK0002OUTPUT	C50A51_C50A92	41	Single	6	Single	0.161307	0.222266	2
BR130827TASK0002OUTPUT	C50A51_C50A92	41	Single	65	Single	0.126462	0.344176	2
BR130827TASK0002OUTPUT	C50A51_C50A92	41	Single	66	Single	0.101889	0.442559	2
BR130827TASK0002OUTPUT	C50A51_C50A92	41	Single	7	Single	-0.108725	0.416556	2
BR130827TASK0002OUTPUT	C50A51_C50A92	41	Single	77	Average	-0.07818	0.556151	1
BR130827TASK0002OUTPUT	C50A51_C50A92	41	Single	8	Average	0.073387	0.580686	2
BR130827TASK0002OUTPUT	C50A51_C50A92	41	Single	80	Single	-0.16476	0.212394	2
BR130827TASK0002OUTPUT	C50A51_C50A92	41	Single	81	Single	0.303231	0.0195649	1
BR130827TASK0002OUTPUT	C50A51_C50A92	41	Single	85	Single	0.233484	0.0751189	1
BR130827TASK0002OUTPUT	C50A51_C50A92	42	Single	43	Average	0.287031	0.0275131	1
BR130827TASK0002OUTPUT	C50A51_C50A92	42	Single	44	Average	0.140295	0.289226	1
BR130827TASK0002OUTPUT	C50A51_C50A92	42	Single	46	Single	0.05037	0.704792	1
BR130827TASK0002OUTPUT	C50A51_C50A92	42	Single	47	Single	0.063963	0.630308	1
BR130827TASK0002OUTPUT	C50A51_C50A92	42	Single	48	Average	0.063435	0.633139	1
BR130827TASK0002OUTPUT	C50A51_C50A92	42	Single	49	Average	-0.145497	0.271536	1
BR130827TASK0002OUTPUT	C50A51_C50A92	42	Single	50	Single	0.017657	0.895334	1
BR130827TASK0002OUTPUT	C50A51_C50A92	42	Single	52	Average	-0.022275	0.867013	1
BR130827TASK0002OUTPUT	C50A51_C50A92	42	Single	53	Single	0.022611	0.866212	1
BR130827TASK0002OUTPUT	C50A51_C50A92	42	Single	54	Average	0.005419	0.967796	1
BR130827TASK0002OUTPUT	C50A51_C50A92	42	Single	55	Single	-0.106301	0.422947	1
BR130827TASK0002OUTPUT	C50A51_C50A92	42	Single	56	Average	-0.020384	0.879285	1
BR130827TASK0002OUTPUT	C50A51_C50A92	42	Single	6	Single	0.194177	0.140575	2
BR130827TASK0002OUTPUT	C50A51_C50A92	42	Single	65	Single	-0.023044	0.863673	2
BR130827TASK0002OUTPUT	C50A51_C50A92	42	Single	66	Single	-0.100804	0.447456	2
BR130827TASK0002OUTPUT	C50A51_C50A92	42	Single	7	Single	-0.319234	0.014583	2
BR130827TASK0002OUTPUT	C50A51_C50A92	42	Single	77	Average	-0.029635	0.823682	1
BR130827TASK0002OUTPUT	C50A51_C50A92	42	Single	8	Average	0.237856	0.0696698	2
BR130827TASK0002OUTPUT	C50A51_C50A92	42	Single	80	Single	-0.053955	0.684839	2
BR130827TASK0002OUTPUT	C50A51_C50A92	42	Single	81	Single	0.207183	0.115375	1
BR130827TASK0002OUTPUT	C50A51_C50A92	42	Single	85	Single	0.064521	0.627325	1
BR130827TASK0002OUTPUT	C50A51_C50A92	43	Average	44	Average	0.008468	0.949246	1
BR130827TASK0002OUTPUT	C50A51_C50A92	43	Average	46	Single	0.058872	0.657828	1
BR130827TASK0002OUTPUT	C50A51_C50A92	43	Average	47	Single	-0.071496	0.590502	1
BR130827TASK0002OUTPUT	C50A51_C50A92	43	Average	48	Average	0.007032	0.957842	1
BR130827TASK0002OUTPUT	C50A51_C50A92	43	Average	49	Average	-0.194187	0.140554	1
BR130827TASK0002OUTPUT	C50A51_C50A92	43	Average	50	Single	-0.031697	0.813274	1
BR130827TASK0002OUTPUT	C50A51_C50A92	43	Average	52	Average	-0.07618	0.566332	1
BR130827TASK0002OUTPUT	C50A51_C50A92	43	Average	53	Single	-0.204243	0.12408	1
BR130827TASK0002OUTPUT	C50A51_C50A92	43	Average	54	Average	0.140241	0.29372	1
BR130827TASK0002OUTPUT	C50A51_C50A92	43	Average	55	Single	-0.139929	0.290499	1
BR130827TASK0002OUTPUT	C50A51_C50A92	43	Average	56	Average	-0.043246	0.747198	1
BR130827TASK0002OUTPUT	C50A51_C50A92	43	Average	6	Single	0.046669	0.725595	2
BR130827TASK0002OUTPUT	C50A51_C50A92	43	Average	65	Single	0.195007	0.142397	2
BR130827TASK0002OUTPUT	C50A51_C50A92	43	Average	66	Single	0.101635	0.443701	2
BR130827TASK0002OUTPUT	C50A51_C50A92	43	Average	7	Single	-0.055051	0.681482	2
BR130827TASK0002OUTPUT	C50A51_C50A92	43	Average	77	Average	-0.041579	0.754524	1
BR130827TASK0002OUTPUT	C50A51_C50A92	43	Average	8	Average	0.140553	0.28833	2
BR130827TASK0002OUTPUT	C50A51_C50A92	43	Average	80	Single	-0.373852	0.0035371	2
BR130827TASK0002OUTPUT	C50A51_C50A92	43	Average	81	Single	0.189071	0.151521	1
BR130827TASK0002OUTPUT	C50A51_C50A92	43	Average	85	Single	0.185493	0.15956	1
BR130827TASK0002OUTPUT	C50A51_C50A92	44	Average	46	Single	-0.111101	0.402186	1
BR130827TASK0002OUTPUT	C50A51_C50A92	44	Average	47	Single	0.094964	0.474333	1
BR130827TASK0002OUTPUT	C50A51_C50A92	44	Average	48	Average	0.110337	0.405451	1
BR130827TASK0002OUTPUT	C50A51_C50A92	44	Average	49	Average	0.055957	0.673794	1
BR130827TASK0002OUTPUT	C50A51_C50A92	44	Average	50	Single	0.047863	0.721255	1
BR130827TASK0002OUTPUT	C50A51_C50A92	44	Average	52	Average	0.235717	0.0722955	1
BR130827TASK0002OUTPUT	C50A51_C50A92	44	Average	53	Single	-0.015141	0.910184	1
BR130827TASK0002OUTPUT	C50A51_C50A92	44	Average	54	Average	-0.008204	0.951265	1
BR130827TASK0002OUTPUT	C50A51_C50A92	44	Average	55	Single	0.022478	0.865807	1
BR130827TASK0002OUTPUT	C50A51_C50A92	44	Average	56	Average	0.103783	0.438175	1
BR130827TASK0002OUTPUT	C50A51_C50A92	44	Average	6	Single	-0.050721	0.702826	2
BR130827TASK0002OUTPUT	C50A51_C50A92	44	Average	65	Single	0.147055	0.270653	2
BR130827TASK0002OUTPUT	C50A51_C50A92	44	Average	66	Single	0.032273	0.808276	2
BR130827TASK0002OUTPUT	C50A51_C50A92	44	Average	7	Single	-0.046208	0.730521	2
BR130827TASK0002OUTPUT	C50A51_C50A92	44	Average	77	Average	0.106778	0.420857	1
BR130827TASK0002OUTPUT	C50A51_C50A92	44	Average	8	Average	-0.024065	0.856434	2
BR130827TASK0002OUTPUT	C50A51_C50A92	44	Average	80	Single	-0.103189	0.436729	2
BR130827TASK0002OUTPUT	C50A51_C50A92	44	Average	81	Single	0.113763	0.390934	1
BR130827TASK0002OUTPUT	C50A51_C50A92	44	Average	85	Single	0.079339	0.550295	1
BR130827TASK0002OUTPUT	C50A51_C50A92	46	Single	47	Single	0.064817	0.625739	1
BR130827TASK0002OUTPUT	C50A51_C50A92	46	Single	48	Average	0.178167	0.176991	1
BR130827TASK0002OUTPUT	C50A51_C50A92	46	Single	49	Average	0.010883	0.934801	1
BR130827TASK0002OUTPUT	C50A51_C50A92	46	Single	50	Single	0.009049	0.946253	1
BR130827TASK0002OUTPUT	C50A51_C50A92	46	Single	52	Average	-0.258702	0.0478803	1
BR130827TASK0002OUTPUT	C50A51_C50A92	46	Single	53	Single	-0.042887	0.74923	1
BR130827TASK0002OUTPUT	C50A51_C50A92	46	Single	54	Average	0.224476	0.0902576	1
BR130827TASK0002OUTPUT	C50A51_C50A92	46	Single	55	Single	0.230073	0.0795992	1
BR130827TASK0002OUTPUT	C50A51_C50A92	46	Single	56	Average	-0.006579	0.960908	1
BR130827TASK0002OUTPUT	C50A51_C50A92	46	Single	6	Single	0.178959	0.175043	2
BR130827TASK0002OUTPUT	C50A51_C50A92	46	Single	65	Single	-0.030158	0.822192	2
BR130827TASK0002OUTPUT	C50A51_C50A92	46	Single	66	Single	0.115298	0.384533	2
BR130827TASK0002OUTPUT	C50A51_C50A92	46	Single	7	Single	0.159609	0.231395	2
BR130827TASK0002OUTPUT	C50A51_C50A92	46	Single	77	Average	-0.111286	0.401398	1
BR130827TASK0002OUTPUT	C50A51_C50A92	46	Single	8	Average	0.325827	0.0117918	2
BR130827TASK0002OUTPUT	C50A51_C50A92	46	Single	80	Single	-0.01283	0.923166	2
BR130827TASK0002OUTPUT	C50A51_C50A92	46	Single	81	Single	0.363664	0.00463696	1
BR130827TASK0002OUTPUT	C50A51_C50A92	46	Single	85	Single	0.179674	0.173297	1
BR130827TASK0002OUTPUT	C50A51_C50A92	47	Single	48	Average	0.19525	0.138351	1
BR130827TASK0002OUTPUT	C50A51_C50A92	47	Single	49	Average	0.367182	0.00422721	1
BR130827TASK0002OUTPUT	C50A51_C50A92	47	Single	50	Single	-0.022619	0.866164	1
BR130827TASK0002OUTPUT	C50A51_C50A92	47	Single	52	Average	0.087785	0.508521	1
BR130827TASK0002OUTPUT	C50A51_C50A92	47	Single	53	Single	-0.165213	0.215209	1
BR130827TASK0002OUTPUT	C50A51_C50A92	47	Single	54	Average	0.240651	0.0688062	1
BR130827TASK0002OUTPUT	C50A51_C50A92	47	Single	55	Single	0.25424	0.0520004	1
BR130827TASK0002OUTPUT	C50A51_C50A92	47	Single	56	Average	0.116793	0.382607	1
BR130827TASK0002OUTPUT	C50A51_C50A92	47	Single	6	Single	-0.056766	0.66935	2
BR130827TASK0002OUTPUT	C50A51_C50A92	47	Single	65	Single	0.168765	0.20537	2
BR130827TASK0002OUTPUT	C50A51_C50A92	47	Single	66	Single	0.394188	0.00200724	2
BR130827TASK0002OUTPUT	C50A51_C50A92	47	Single	7	Single	-0.06495	0.628112	2
BR130827TASK0002OUTPUT	C50A51_C50A92	47	Single	77	Average	0.152127	0.250053	1
BR130827TASK0002OUTPUT	C50A51_C50A92	47	Single	8	Average	-0.014919	0.910702	2
BR130827TASK0002OUTPUT	C50A51_C50A92	47	Single	80	Single	-0.077325	0.560495	2
BR130827TASK0002OUTPUT	C50A51_C50A92	47	Single	81	Single	0.180101	0.172262	1
BR130827TASK0002OUTPUT	C50A51_C50A92	47	Single	85	Single	-0.110817	0.403398	1
BR130827TASK0002OUTPUT	C50A51_C50A92	48	Average	49	Average	0.226049	0.0851552	1
BR130827TASK0002OUTPUT	C50A51_C50A92	48	Average	50	Single	0.013601	0.919286	1
BR130827TASK0002OUTPUT	C50A51_C50A92	48	Average	52	Average	-0.00767	0.954022	1
BR130827TASK0002OUTPUT	C50A51_C50A92	48	Average	53	Single	-0.034624	0.79639	1
BR130827TASK0002OUTPUT	C50A51_C50A92	48	Average	54	Average	0.301157	0.0216056	1
BR130827TASK0002OUTPUT	C50A51_C50A92	48	Average	55	Single	0.335225	0.00944848	1
BR130827TASK0002OUTPUT	C50A51_C50A92	48	Average	56	Average	0.117522	0.379627	1
BR130827TASK0002OUTPUT	C50A51_C50A92	48	Average	6	Single	0.008845	0.946988	2
BR130827TASK0002OUTPUT	C50A51_C50A92	48	Average	65	Single	0.050851	0.704625	2
BR130827TASK0002OUTPUT	C50A51_C50A92	48	Average	66	Single	0.003398	0.97962	2
BR130827TASK0002OUTPUT	C50A51_C50A92	48	Average	7	Single	-0.03492	0.794682	2
BR130827TASK0002OUTPUT	C50A51_C50A92	48	Average	77	Average	0.340715	0.00827586	1
BR130827TASK0002OUTPUT	C50A51_C50A92	48	Average	8	Average	0.079319	0.550397	2
BR130827TASK0002OUTPUT	C50A51_C50A92	48	Average	80	Single	-0.050231	0.705567	2
BR130827TASK0002OUTPUT	C50A51_C50A92	48	Average	81	Single	0.305263	0.0187221	1
BR130827TASK0002OUTPUT	C50A51_C50A92	48	Average	85	Single	-0.010872	0.934867	1
BR130827TASK0002OUTPUT	C50A51_C50A92	49	Average	50	Single	-0.026117	0.845704	1
BR130827TASK0002OUTPUT	C50A51_C50A92	49	Average	52	Average	0.173478	0.188851	1
BR130827TASK0002OUTPUT	C50A51_C50A92	49	Average	53	Single	-0.088768	0.507566	1
BR130827TASK0002OUTPUT	C50A51_C50A92	49	Average	54	Average	0.136484	0.306974	1
BR130827TASK0002OUTPUT	C50A51_C50A92	49	Average	55	Single	0.021385	0.872277	1
BR130827TASK0002OUTPUT	C50A51_C50A92	49	Average	56	Average	0.026425	0.843903	1
BR130827TASK0002OUTPUT	C50A51_C50A92	49	Average	6	Single	-0.276989	0.0336854	2
BR130827TASK0002OUTPUT	C50A51_C50A92	49	Average	65	Single	-0.038225	0.775737	2
BR130827TASK0002OUTPUT	C50A51_C50A92	49	Average	66	Single	-0.148509	0.26163	2
BR130827TASK0002OUTPUT	C50A51_C50A92	49	Average	7	Single	0.094567	0.480123	2
BR130827TASK0002OUTPUT	C50A51_C50A92	49	Average	77	Average	0.187878	0.154166	1
BR130827TASK0002OUTPUT	C50A51_C50A92	49	Average	8	Average	0.052687	0.691875	2
BR130827TASK0002OUTPUT	C50A51_C50A92	49	Average	80	Single	0.029796	0.82274	2
BR130827TASK0002OUTPUT	C50A51_C50A92	49	Average	81	Single	0.176522	0.181089	1
BR130827TASK0002OUTPUT	C50A51_C50A92	49	Average	85	Single	-0.138997	0.293756	1
BR130827TASK0002OUTPUT	C50A51_C50A92	50	Single	52	Average	-0.026225	0.845073	1
BR130827TASK0002OUTPUT	C50A51_C50A92	50	Single	53	Single	0.124982	0.354277	1
BR130827TASK0002OUTPUT	C50A51_C50A92	50	Single	54	Average	-0.035878	0.791045	1
BR130827TASK0002OUTPUT	C50A51_C50A92	50	Single	55	Single	-0.090387	0.499827	1
BR130827TASK0002OUTPUT	C50A51_C50A92	50	Single	56	Average	-0.017977	0.89441	1
BR130827TASK0002OUTPUT	C50A51_C50A92	50	Single	6	Single	0.017503	0.896246	2
BR130827TASK0002OUTPUT	C50A51_C50A92	50	Single	65	Single	0.070944	0.599991	2
BR130827TASK0002OUTPUT	C50A51_C50A92	50	Single	66	Single	-0.216012	0.103403	2
BR130827TASK0002OUTPUT	C50A51_C50A92	50	Single	7	Single	-0.150371	0.264215	2
BR130827TASK0002OUTPUT	C50A51_C50A92	50	Single	77	Average	-0.181093	0.173697	1
BR130827TASK0002OUTPUT	C50A51_C50A92	50	Single	8	Average	-0.062701	0.640082	2
BR130827TASK0002OUTPUT	C50A51_C50A92	50	Single	80	Single	-0.178065	0.181125	2
BR130827TASK0002OUTPUT	C50A51_C50A92	50	Single	81	Single	0.227488	0.0859097	1
BR130827TASK0002OUTPUT	C50A51_C50A92	50	Single	85	Single	0.147352	0.269675	1
BR130827TASK0002OUTPUT	C50A51_C50A92	52	Average	53	Single	0.13931	0.29697	1
BR130827TASK0002OUTPUT	C50A51_C50A92	52	Average	54	Average	0.015996	0.905136	1
BR130827TASK0002OUTPUT	C50A51_C50A92	52	Average	55	Single	0.129863	0.326933	1
BR130827TASK0002OUTPUT	C50A51_C50A92	52	Average	56	Average	-0.040663	0.761843	1
BR130827TASK0002OUTPUT	C50A51_C50A92	52	Average	6	Single	-0.236008	0.0719332	2
BR130827TASK0002OUTPUT	C50A51_C50A92	52	Average	65	Single	-0.056681	0.672578	2
BR130827TASK0002OUTPUT	C50A51_C50A92	52	Average	66	Single	-0.108393	0.413827	2
BR130827TASK0002OUTPUT	C50A51_C50A92	52	Average	7	Single	0.019596	0.883918	2
BR130827TASK0002OUTPUT	C50A51_C50A92	52	Average	77	Average	0.082892	0.532524	1
BR130827TASK0002OUTPUT	C50A51_C50A92	52	Average	8	Average	-0.002278	0.986337	2
BR130827TASK0002OUTPUT	C50A51_C50A92	52	Average	80	Single	0.136213	0.303624	2
BR130827TASK0002OUTPUT	C50A51_C50A92	52	Average	81	Single	0.105198	0.427802	1
BR130827TASK0002OUTPUT	C50A51_C50A92	52	Average	85	Single	-0.035522	0.789397	1
BR130827TASK0002OUTPUT	C50A51_C50A92	53	Single	54	Average	-0.223089	0.0953022	1
BR130827TASK0002OUTPUT	C50A51_C50A92	53	Single	55	Single	-0.036192	0.787378	1
BR130827TASK0002OUTPUT	C50A51_C50A92	53	Single	56	Average	-0.137636	0.307266	1
BR130827TASK0002OUTPUT	C50A51_C50A92	53	Single	6	Single	-0.028446	0.832134	2
BR130827TASK0002OUTPUT	C50A51_C50A92	53	Single	65	Single	0.087733	0.512549	2
BR130827TASK0002OUTPUT	C50A51_C50A92	53	Single	66	Single	-0.188008	0.157568	2
BR130827TASK0002OUTPUT	C50A51_C50A92	53	Single	7	Single	-0.149148	0.268163	2
BR130827TASK0002OUTPUT	C50A51_C50A92	53	Single	77	Average	0.069986	0.601646	1
BR130827TASK0002OUTPUT	C50A51_C50A92	53	Single	8	Average	-0.081944	0.540862	2
BR130827TASK0002OUTPUT	C50A51_C50A92	53	Single	80	Single	0.304709	0.0200354	2
BR130827TASK0002OUTPUT	C50A51_C50A92	53	Single	81	Single	0.021427	0.87316	1
BR130827TASK0002OUTPUT	C50A51_C50A92	53	Single	85	Single	-0.166128	0.212641	1
BR130827TASK0002OUTPUT	C50A51_C50A92	54	Average	55	Single	0.287804	0.0284723	1
BR130827TASK0002OUTPUT	C50A51_C50A92	54	Average	56	Average	0.233981	0.0798101	1
BR130827TASK0002OUTPUT	C50A51_C50A92	54	Average	6	Single	-0.212086	0.109981	2
BR130827TASK0002OUTPUT	C50A51_C50A92	54	Average	65	Single	0.109577	0.417131	2
BR130827TASK0002OUTPUT	C50A51_C50A92	54	Average	66	Single	-0.154649	0.246406	2
BR130827TASK0002OUTPUT	C50A51_C50A92	54	Average	7	Single	0.048768	0.718662	2
BR130827TASK0002OUTPUT	C50A51_C50A92	54	Average	77	Average	0.228569	0.0843903	1
BR130827TASK0002OUTPUT	C50A51_C50A92	54	Average	8	Average	-0.177683	0.182078	2
BR130827TASK0002OUTPUT	C50A51_C50A92	54	Average	80	Single	0.047366	0.724033	2
BR130827TASK0002OUTPUT	C50A51_C50A92	54	Average	81	Single	0.128054	0.338087	1
BR130827TASK0002OUTPUT	C50A51_C50A92	54	Average	85	Single	-0.120058	0.369354	1
BR130827TASK0002OUTPUT	C50A51_C50A92	55	Single	56	Average	0.159862	0.230646	1
BR130827TASK0002OUTPUT	C50A51_C50A92	55	Single	6	Single	-0.153357	0.246199	2
BR130827TASK0002OUTPUT	C50A51_C50A92	55	Single	65	Single	0.18919	0.154926	2
BR130827TASK0002OUTPUT	C50A51_C50A92	55	Single	66	Single	0.1537	0.245132	2
BR130827TASK0002OUTPUT	C50A51_C50A92	55	Single	7	Single	0.133907	0.316281	2
BR130827TASK0002OUTPUT	C50A51_C50A92	55	Single	77	Average	0.19655	0.135692	1
BR130827TASK0002OUTPUT	C50A51_C50A92	55	Single	8	Average	0.018959	0.886667	2
BR130827TASK0002OUTPUT	C50A51_C50A92	55	Single	80	Single	0.105718	0.425511	2
BR130827TASK0002OUTPUT	C50A51_C50A92	55	Single	81	Single	0.178617	0.175883	1
BR130827TASK0002OUTPUT	C50A51_C50A92	55	Single	85	Single	-0.116654	0.378927	1
BR130827TASK0002OUTPUT	C50A51_C50A92	56	Average	6	Single	-0.078875	0.556172	2
BR130827TASK0002OUTPUT	C50A51_C50A92	56	Average	65	Single	-0.017678	0.896159	2
BR130827TASK0002OUTPUT	C50A51_C50A92	56	Average	66	Single	-0.072447	0.588893	2
BR130827TASK0002OUTPUT	C50A51_C50A92	56	Average	7	Single	-0.013106	0.922916	2
BR130827TASK0002OUTPUT	C50A51_C50A92	56	Average	77	Average	0.110725	0.407983	1
BR130827TASK0002OUTPUT	C50A51_C50A92	56	Average	8	Average	-0.196424	0.139463	2
BR130827TASK0002OUTPUT	C50A51_C50A92	56	Average	80	Single	0.002944	0.982502	2
BR130827TASK0002OUTPUT	C50A51_C50A92	56	Average	81	Single	0.014754	0.912469	1
BR130827TASK0002OUTPUT	C50A51_C50A92	56	Average	85	Single	0.096056	0.473202	1
BR130827TASK0002OUTPUT	C50A51_C50A92	6	Single	65	Single	0.088668	0.508048	1
BR130827TASK0002OUTPUT	C50A51_C50A92	6	Single	66	Single	0.106021	0.424176	1
BR130827TASK0002OUTPUT	C50A51_C50A92	6	Single	7	Single	-0.304067	0.0203117	1
BR130827TASK0002OUTPUT	C50A51_C50A92	6	Single	77	Average	0.046375	0.727254	2
BR130827TASK0002OUTPUT	C50A51_C50A92	6	Single	8	Average	0.320878	0.0132163	1
BR130827TASK0002OUTPUT	C50A51_C50A92	6	Single	80	Single	-0.003374	0.979769	1
BR130827TASK0002OUTPUT	C50A51_C50A92	6	Single	81	Single	0.053796	0.685723	2
BR130827TASK0002OUTPUT	C50A51_C50A92	6	Single	85	Single	0.022297	0.866882	2
BR130827TASK0002OUTPUT	C50A51_C50A92	65	Single	66	Single	0.131014	0.326945	1
BR130827TASK0002OUTPUT	C50A51_C50A92	65	Single	7	Single	0.033661	0.803691	1
BR130827TASK0002OUTPUT	C50A51_C50A92	65	Single	77	Average	0.107397	0.422304	2
BR130827TASK0002OUTPUT	C50A51_C50A92	65	Single	8	Average	0.202403	0.127579	1
BR130827TASK0002OUTPUT	C50A51_C50A92	65	Single	80	Single	-0.094221	0.481734	1
BR130827TASK0002OUTPUT	C50A51_C50A92	65	Single	81	Single	0.078054	0.560301	2
BR130827TASK0002OUTPUT	C50A51_C50A92	65	Single	85	Single	-0.164833	0.21628	2
BR130827TASK0002OUTPUT	C50A51_C50A92	66	Single	7	Single	0.23988	0.0697269	1
BR130827TASK0002OUTPUT	C50A51_C50A92	66	Single	77	Average	-0.1541	0.243893	2
BR130827TASK0002OUTPUT	C50A51_C50A92	66	Single	8	Average	0.147807	0.263914	1
BR130827TASK0002OUTPUT	C50A51_C50A92	66	Single	80	Single	0.006576	0.960577	1
BR130827TASK0002OUTPUT	C50A51_C50A92	66	Single	81	Single	0.085345	0.520423	2
BR130827TASK0002OUTPUT	C50A51_C50A92	66	Single	85	Single	0.123684	0.350665	2
BR130827TASK0002OUTPUT	C50A51_C50A92	7	Single	77	Average	-0.090291	0.50028	2
BR130827TASK0002OUTPUT	C50A51_C50A92	7	Single	8	Average	0.07782	0.561484	1
BR130827TASK0002OUTPUT	C50A51_C50A92	7	Single	80	Single	0.152664	0.252597	1
BR130827TASK0002OUTPUT	C50A51_C50A92	7	Single	81	Single	-0.00102	0.993936	2
BR130827TASK0002OUTPUT	C50A51_C50A92	7	Single	85	Single	0.032374	0.80936	2
BR130827TASK0002OUTPUT	C50A51_C50A92	77	Average	8	Average	0.048925	0.712887	2
BR130827TASK0002OUTPUT	C50A51_C50A92	77	Average	80	Single	0.183613	0.163907	2
BR130827TASK0002OUTPUT	C50A51_C50A92	77	Average	81	Single	-0.022613	0.865008	1
BR130827TASK0002OUTPUT	C50A51_C50A92	77	Average	85	Single	-0.164516	0.213081	1
BR130827TASK0002OUTPUT	C50A51_C50A92	8	Average	80	Single	0.033187	0.802954	1
BR130827TASK0002OUTPUT	C50A51_C50A92	8	Average	81	Single	0.192803	0.143459	2
BR130827TASK0002OUTPUT	C50A51_C50A92	8	Average	85	Single	0.138235	0.296434	2
BR130827TASK0002OUTPUT	C50A51_C50A92	80	Single	81	Single	-0.110175	0.406145	2
BR130827TASK0002OUTPUT	C50A51_C50A92	80	Single	85	Single	-0.098953	0.455885	2
BR130827TASK0002OUTPUT	C50A51_C50A92	81	Single	85	Single	0.260408	0.0463771	1
BR130827TASK0002OUTPUT	C50A91_C50A52	10	Single	11	Single	0.162307	0.286771	1
BR130827TASK0002OUTPUT	C50A91_C50A52	10	Single	14	Average	0.102363	0.503424	1
BR130827TASK0002OUTPUT	C50A91_C50A52	10	Single	3	Single	0.145655	0.339732	1
BR130827TASK0002OUTPUT	C50A91_C50A52	10	Single	33	Single	0.166463	0.27444	1
BR130827TASK0002OUTPUT	C50A91_C50A52	10	Single	34	Outside	-0.085843	0.575012	1
BR130827TASK0002OUTPUT	C50A91_C50A52	10	Single	35	Single	0.004298	0.977648	1
BR130827TASK0002OUTPUT	C50A91_C50A52	10	Single	36	Single	0.056568	0.712064	1
BR130827TASK0002OUTPUT	C50A91_C50A52	10	Single	37	Single	-0.041231	0.790442	1
BR130827TASK0002OUTPUT	C50A91_C50A52	10	Single	42	Single	0.050752	0.743541	2
BR130827TASK0002OUTPUT	C50A91_C50A52	10	Single	43	Single	0.135173	0.375981	2
BR130827TASK0002OUTPUT	C50A91_C50A52	10	Single	44	Single	0.094767	0.535771	2
BR130827TASK0002OUTPUT	C50A91_C50A52	10	Single	45	Single	-0.059567	0.700914	2
BR130827TASK0002OUTPUT	C50A91_C50A52	10	Single	46	Single	0.213383	0.159307	2
BR130827TASK0002OUTPUT	C50A91_C50A52	10	Single	48	Single	0.020747	0.892397	2
BR130827TASK0002OUTPUT	C50A91_C50A52	10	Single	49	Single	-0.010336	0.946275	2
BR130827TASK0002OUTPUT	C50A91_C50A52	10	Single	5	Single	0.04104	0.788955	1
BR130827TASK0002OUTPUT	C50A91_C50A52	10	Single	50	Single	-0.129519	0.396454	2
BR130827TASK0002OUTPUT	C50A91_C50A52	10	Single	51	Average	0.035491	0.816961	2
BR130827TASK0002OUTPUT	C50A91_C50A52	10	Single	52	Single	-0.058084	0.704694	2
BR130827TASK0002OUTPUT	C50A91_C50A52	10	Single	54	Average	0.190923	0.209006	2
BR130827TASK0002OUTPUT	C50A91_C50A52	10	Single	55	Single	-0.100313	0.512055	2
BR130827TASK0002OUTPUT	C50A91_C50A52	10	Single	6	Single	0.157078	0.308543	1
BR130827TASK0002OUTPUT	C50A91_C50A52	10	Single	68	Single	0.138097	0.365646	1
BR130827TASK0002OUTPUT	C50A91_C50A52	10	Single	7	Single	-0.07291	0.634097	1
BR130827TASK0002OUTPUT	C50A91_C50A52	10	Single	8	Single	0.209907	0.166374	1
BR130827TASK0002OUTPUT	C50A91_C50A52	10	Single	80	Single	0.004353	0.977362	1
BR130827TASK0002OUTPUT	C50A91_C50A52	10	Single	81	Single	0.002743	0.985733	2
BR130827TASK0002OUTPUT	C50A91_C50A52	11	Single	14	Average	0.186146	0.220839	1
BR130827TASK0002OUTPUT	C50A91_C50A52	11	Single	3	Single	-0.010809	0.94382	1
BR130827TASK0002OUTPUT	C50A91_C50A52	11	Single	33	Single	0.165796	0.276397	1
BR130827TASK0002OUTPUT	C50A91_C50A52	11	Single	34	Outside	-0.172294	0.25774	1
BR130827TASK0002OUTPUT	C50A91_C50A52	11	Single	35	Single	-0.046233	0.762974	1
BR130827TASK0002OUTPUT	C50A91_C50A52	11	Single	36	Single	0.221757	0.143187	1
BR130827TASK0002OUTPUT	C50A91_C50A52	11	Single	37	Single	0.154909	0.315356	1
BR130827TASK0002OUTPUT	C50A91_C50A52	11	Single	42	Single	0.130976	0.396747	2
BR130827TASK0002OUTPUT	C50A91_C50A52	11	Single	43	Single	-0.130069	0.394433	2
BR130827TASK0002OUTPUT	C50A91_C50A52	11	Single	44	Single	-0.157836	0.30043	2
BR130827TASK0002OUTPUT	C50A91_C50A52	11	Single	45	Single	0.031403	0.839636	2
BR130827TASK0002OUTPUT	C50A91_C50A52	11	Single	46	Single	0.24288	0.107919	2
BR130827TASK0002OUTPUT	C50A91_C50A52	11	Single	48	Single	0.021936	0.886271	2
BR130827TASK0002OUTPUT	C50A91_C50A52	11	Single	49	Single	0.092254	0.546687	2
BR130827TASK0002OUTPUT	C50A91_C50A52	11	Single	5	Single	0.0369	0.809825	1
BR130827TASK0002OUTPUT	C50A91_C50A52	11	Single	50	Single	-0.045183	0.768208	2
BR130827TASK0002OUTPUT	C50A91_C50A52	11	Single	51	Average	-0.010832	0.9437	2
BR130827TASK0002OUTPUT	C50A91_C50A52	11	Single	52	Single	0.061972	0.68591	2
BR130827TASK0002OUTPUT	C50A91_C50A52	11	Single	54	Average	0.107497	0.482144	2
BR130827TASK0002OUTPUT	C50A91_C50A52	11	Single	55	Single	0.155632	0.307317	2
BR130827TASK0002OUTPUT	C50A91_C50A52	11	Single	6	Single	0.305455	0.0437682	1
BR130827TASK0002OUTPUT	C50A91_C50A52	11	Single	68	Single	-0.051186	0.738436	1
BR130827TASK0002OUTPUT	C50A91_C50A52	11	Single	7	Single	0.166662	0.273859	1
BR130827TASK0002OUTPUT	C50A91_C50A52	11	Single	8	Single	0.227039	0.133659	1
BR130827TASK0002OUTPUT	C50A91_C50A52	11	Single	80	Single	-0.108998	0.476011	1
BR130827TASK0002OUTPUT	C50A91_C50A52	11	Single	81	Single	0.032811	0.830574	2
BR130827TASK0002OUTPUT	C50A91_C50A52	14	Average	3	Single	0.317983	0.0332822	1
BR130827TASK0002OUTPUT	C50A91_C50A52	14	Average	33	Single	0.08008	0.601032	1
BR130827TASK0002OUTPUT	C50A91_C50A52	14	Average	34	Outside	0.025593	0.867466	1
BR130827TASK0002OUTPUT	C50A91_C50A52	14	Average	35	Single	-0.115307	0.450696	1
BR130827TASK0002OUTPUT	C50A91_C50A52	14	Average	36	Single	0.17028	0.263431	1
BR130827TASK0002OUTPUT	C50A91_C50A52	14	Average	37	Single	-0.001008	0.99482	1
BR130827TASK0002OUTPUT	C50A91_C50A52	14	Average	42	Single	0.311467	0.0395836	2
BR130827TASK0002OUTPUT	C50A91_C50A52	14	Average	43	Single	-0.247469	0.101221	2
BR130827TASK0002OUTPUT	C50A91_C50A52	14	Average	44	Single	-0.049941	0.744584	2
BR130827TASK0002OUTPUT	C50A91_C50A52	14	Average	45	Single	-0.155156	0.314577	2
BR130827TASK0002OUTPUT	C50A91_C50A52	14	Average	46	Single	0.111969	0.463994	2
BR130827TASK0002OUTPUT	C50A91_C50A52	14	Average	48	Single	0.006841	0.964426	2
BR130827TASK0002OUTPUT	C50A91_C50A52	14	Average	49	Single	0.160929	0.290936	2
BR130827TASK0002OUTPUT	C50A91_C50A52	14	Average	5	Single	0.348882	0.0188317	1
BR130827TASK0002OUTPUT	C50A91_C50A52	14	Average	50	Single	-0.105711	0.489494	2
BR130827TASK0002OUTPUT	C50A91_C50A52	14	Average	51	Average	0.116397	0.446397	2
BR130827TASK0002OUTPUT	C50A91_C50A52	14	Average	52	Single	0.373779	0.011431	2
BR130827TASK0002OUTPUT	C50A91_C50A52	14	Average	54	Average	0.28868	0.0544557	2
BR130827TASK0002OUTPUT	C50A91_C50A52	14	Average	55	Single	-0.043916	0.774539	2
BR130827TASK0002OUTPUT	C50A91_C50A52	14	Average	6	Single	0.203829	0.184473	1
BR130827TASK0002OUTPUT	C50A91_C50A52	14	Average	68	Single	-0.067771	0.658246	1
BR130827TASK0002OUTPUT	C50A91_C50A52	14	Average	7	Single	-0.044376	0.77224	1
BR130827TASK0002OUTPUT	C50A91_C50A52	14	Average	8	Single	0.195942	0.19706	1
BR130827TASK0002OUTPUT	C50A91_C50A52	14	Average	80	Single	0.066004	0.666628	1
BR130827TASK0002OUTPUT	C50A91_C50A52	14	Average	81	Single	0.214245	0.15759	2
BR130827TASK0002OUTPUT	C50A91_C50A52	3	Single	33	Single	0.305878	0.0410113	1
BR130827TASK0002OUTPUT	C50A91_C50A52	3	Single	34	Outside	0.363249	0.0141829	1
BR130827TASK0002OUTPUT	C50A91_C50A52	3	Single	35	Single	0.331938	0.0259051	1
BR130827TASK0002OUTPUT	C50A91_C50A52	3	Single	36	Single	0.514039	0.000303972	1
BR130827TASK0002OUTPUT	C50A91_C50A52	3	Single	37	Single	-0.143135	0.353978	1
BR130827TASK0002OUTPUT	C50A91_C50A52	3	Single	42	Single	-0.142151	0.35733	2
BR130827TASK0002OUTPUT	C50A91_C50A52	3	Single	43	Single	-0.005971	0.96895	2
BR130827TASK0002OUTPUT	C50A91_C50A52	3	Single	44	Single	-0.280745	0.0617532	2
BR130827TASK0002OUTPUT	C50A91_C50A52	3	Single	45	Single	-0.059078	0.703256	2
BR130827TASK0002OUTPUT	C50A91_C50A52	3	Single	46	Single	0.059624	0.697231	2
BR130827TASK0002OUTPUT	C50A91_C50A52	3	Single	48	Single	-0.079448	0.603916	2
BR130827TASK0002OUTPUT	C50A91_C50A52	3	Single	49	Single	0.245974	0.103367	2
BR130827TASK0002OUTPUT	C50A91_C50A52	3	Single	5	Single	0.176168	0.247029	1
BR130827TASK0002OUTPUT	C50A91_C50A52	3	Single	50	Single	-0.161968	0.287792	2
BR130827TASK0002OUTPUT	C50A91_C50A52	3	Single	51	Average	0.066567	0.663956	2
BR130827TASK0002OUTPUT	C50A91_C50A52	3	Single	52	Single	0.26167	0.0825043	2
BR130827TASK0002OUTPUT	C50A91_C50A52	3	Single	54	Average	0.049716	0.745694	2
BR130827TASK0002OUTPUT	C50A91_C50A52	3	Single	55	Single	-0.156512	0.304556	2
BR130827TASK0002OUTPUT	C50A91_C50A52	3	Single	6	Single	-0.028292	0.855344	1
BR130827TASK0002OUTPUT	C50A91_C50A52	3	Single	68	Single	-0.204431	0.177965	1
BR130827TASK0002OUTPUT	C50A91_C50A52	3	Single	7	Single	-0.219036	0.148285	1
BR130827TASK0002OUTPUT	C50A91_C50A52	3	Single	8	Single	0.025876	0.866011	1
BR130827TASK0002OUTPUT	C50A91_C50A52	3	Single	80	Single	-0.053511	0.727004	1
BR130827TASK0002OUTPUT	C50A91_C50A52	3	Single	81	Single	-0.003067	0.984045	2
BR130827TASK0002OUTPUT	C50A91_C50A52	33	Single	34	Outside	0.190816	0.209267	1
BR130827TASK0002OUTPUT	C50A91_C50A52	33	Single	35	Single	0.560403	6.24297e-05	1
BR130827TASK0002OUTPUT	C50A91_C50A52	33	Single	36	Single	0.419848	0.00408977	1
BR130827TASK0002OUTPUT	C50A91_C50A52	33	Single	37	Single	-0.011958	0.938592	1
BR130827TASK0002OUTPUT	C50A91_C50A52	33	Single	42	Single	-0.075157	0.62777	2
BR130827TASK0002OUTPUT	C50A91_C50A52	33	Single	43	Single	-0.241164	0.11051	2
BR130827TASK0002OUTPUT	C50A91_C50A52	33	Single	44	Single	-0.184944	0.223887	2
BR130827TASK0002OUTPUT	C50A91_C50A52	33	Single	45	Single	0.037234	0.810366	2
BR130827TASK0002OUTPUT	C50A91_C50A52	33	Single	46	Single	0.108763	0.47697	2
BR130827TASK0002OUTPUT	C50A91_C50A52	33	Single	48	Single	0.227286	0.133224	2
BR130827TASK0002OUTPUT	C50A91_C50A52	33	Single	49	Single	0.262755	0.0811941	2
BR130827TASK0002OUTPUT	C50A91_C50A52	33	Single	5	Single	-0.094311	0.537741	1
BR130827TASK0002OUTPUT	C50A91_C50A52	33	Single	50	Single	-0.176483	0.246172	2
BR130827TASK0002OUTPUT	C50A91_C50A52	33	Single	51	Average	-0.00431	0.977584	2
BR130827TASK0002OUTPUT	C50A91_C50A52	33	Single	52	Single	0.250466	0.097022	2
BR130827TASK0002OUTPUT	C50A91_C50A52	33	Single	54	Average	0.023519	0.878122	2
BR130827TASK0002OUTPUT	C50A91_C50A52	33	Single	55	Single	-0.004252	0.977885	2
BR130827TASK0002OUTPUT	C50A91_C50A52	33	Single	6	Single	-0.009444	0.951486	1
BR130827TASK0002OUTPUT	C50A91_C50A52	33	Single	68	Single	-0.084137	0.582661	1
BR130827TASK0002OUTPUT	C50A91_C50A52	33	Single	7	Single	0.27192	0.0707646	1
BR130827TASK0002OUTPUT	C50A91_C50A52	33	Single	8	Single	0.014663	0.92384	1
BR130827TASK0002OUTPUT	C50A91_C50A52	33	Single	80	Single	-0.249155	0.0988419	1
BR130827TASK0002OUTPUT	C50A91_C50A52	33	Single	81	Single	-0.21505	0.155996	2
BR130827TASK0002OUTPUT	C50A91_C50A52	34	Outside	35	Single	0.408592	0.00532705	1
BR130827TASK0002OUTPUT	C50A91_C50A52	34	Outside	36	Single	0.355488	0.0165554	1
BR130827TASK0002OUTPUT	C50A91_C50A52	34	Outside	37	Single	-0.126786	0.412153	1
BR130827TASK0002OUTPUT	C50A91_C50A52	34	Outside	42	Single	0.041103	0.791081	2
BR130827TASK0002OUTPUT	C50A91_C50A52	34	Outside	43	Single	-0.007355	0.961757	2
BR130827TASK0002OUTPUT	C50A91_C50A52	34	Outside	44	Single	0.18162	0.23247	2
BR130827TASK0002OUTPUT	C50A91_C50A52	34	Outside	45	Single	0.026334	0.865263	2
BR130827TASK0002OUTPUT	C50A91_C50A52	34	Outside	46	Single	-0.08107	0.596525	2
BR130827TASK0002OUTPUT	C50A91_C50A52	34	Outside	48	Single	0.069594	0.649638	2
BR130827TASK0002OUTPUT	C50A91_C50A52	34	Outside	49	Single	0.388307	0.00839237	2
BR130827TASK0002OUTPUT	C50A91_C50A52	34	Outside	5	Single	0.150964	0.32223	1
BR130827TASK0002OUTPUT	C50A91_C50A52	34	Outside	50	Single	-0.073887	0.629548	2
BR130827TASK0002OUTPUT	C50A91_C50A52	34	Outside	51	Average	0.116157	0.447342	2
BR130827TASK0002OUTPUT	C50A91_C50A52	34	Outside	52	Single	0.076289	0.618423	2
BR130827TASK0002OUTPUT	C50A91_C50A52	34	Outside	54	Average	0.058031	0.704947	2
BR130827TASK0002OUTPUT	C50A91_C50A52	34	Outside	55	Single	-0.014412	0.925137	2
BR130827TASK0002OUTPUT	C50A91_C50A52	34	Outside	6	Single	-0.230304	0.132586	1
BR130827TASK0002OUTPUT	C50A91_C50A52	34	Outside	68	Single	0.108809	0.476782	1
BR130827TASK0002OUTPUT	C50A91_C50A52	34	Outside	7	Single	-0.110447	0.470129	1
BR130827TASK0002OUTPUT	C50A91_C50A52	34	Outside	8	Single	-0.0585	0.702674	1
BR130827TASK0002OUTPUT	C50A91_C50A52	34	Outside	80	Single	-0.160371	0.292635	1
BR130827TASK0002OUTPUT	C50A91_C50A52	34	Outside	81	Single	0.07491	0.6248	2
BR130827TASK0002OUTPUT	C50A91_C50A52	35	Single	36	Single	0.505936	0.000391832	1
BR130827TASK0002OUTPUT	C50A91_C50A52	35	Single	37	Single	0.137591	0.37312	1
BR130827TASK0002OUTPUT	C50A91_C50A52	35	Single	42	Single	-0.121457	0.432234	2
BR130827TASK0002OUTPUT	C50A91_C50A52	35	Single	43	Single	-0.098297	0.520613	2
BR130827TASK0002OUTPUT	C50A91_C50A52	35	Single	44	Single	-0.014483	0.924769	2
BR130827TASK0002OUTPUT	C50A91_C50A52	35	Single	45	Single	0.140895	0.36164	2
BR130827TASK0002OUTPUT	C50A91_C50A52	35	Single	46	Single	-0.185647	0.2221	2
BR130827TASK0002OUTPUT	C50A91_C50A52	35	Single	48	Single	0.119551	0.434086	2
BR130827TASK0002OUTPUT	C50A91_C50A52	35	Single	49	Single	0.278966	0.0634916	2
BR130827TASK0002OUTPUT	C50A91_C50A52	35	Single	5	Single	0.05756	0.707238	1
BR130827TASK0002OUTPUT	C50A91_C50A52	35	Single	50	Single	-0.284204	0.0584816	2
BR130827TASK0002OUTPUT	C50A91_C50A52	35	Single	51	Average	0.003186	0.983429	2
BR130827TASK0002OUTPUT	C50A91_C50A52	35	Single	52	Single	0.173469	0.254458	2
BR130827TASK0002OUTPUT	C50A91_C50A52	35	Single	54	Average	-0.162805	0.285275	2
BR130827TASK0002OUTPUT	C50A91_C50A52	35	Single	55	Single	-0.226591	0.134449	2
BR130827TASK0002OUTPUT	C50A91_C50A52	35	Single	6	Single	-0.25833	0.0904348	1
BR130827TASK0002OUTPUT	C50A91_C50A52	35	Single	68	Single	-0.00451	0.976541	1
BR130827TASK0002OUTPUT	C50A91_C50A52	35	Single	7	Single	0.098225	0.520922	1
BR130827TASK0002OUTPUT	C50A91_C50A52	35	Single	8	Single	-0.122621	0.42229	1
BR130827TASK0002OUTPUT	C50A91_C50A52	35	Single	80	Single	-0.153253	0.314861	1
BR130827TASK0002OUTPUT	C50A91_C50A52	35	Single	81	Single	-0.455754	0.00165437	2
BR130827TASK0002OUTPUT	C50A91_C50A52	36	Single	37	Single	0.125638	0.416434	1
BR130827TASK0002OUTPUT	C50A91_C50A52	36	Single	42	Single	-0.135964	0.378852	2
BR130827TASK0002OUTPUT	C50A91_C50A52	36	Single	43	Single	-0.232908	0.123637	2
BR130827TASK0002OUTPUT	C50A91_C50A52	36	Single	44	Single	-0.320735	0.0317041	2
BR130827TASK0002OUTPUT	C50A91_C50A52	36	Single	45	Single	0.19806	0.197479	2
BR130827TASK0002OUTPUT	C50A91_C50A52	36	Single	46	Single	-0.047739	0.755492	2
BR130827TASK0002OUTPUT	C50A91_C50A52	36	Single	48	Single	0.135481	0.374883	2
BR130827TASK0002OUTPUT	C50A91_C50A52	36	Single	49	Single	0.264841	0.0787203	2
BR130827TASK0002OUTPUT	C50A91_C50A52	36	Single	5	Single	0.105621	0.489863	1
BR130827TASK0002OUTPUT	C50A91_C50A52	36	Single	50	Single	-0.24519	0.104507	2
BR130827TASK0002OUTPUT	C50A91_C50A52	36	Single	51	Average	0.339323	0.022589	2
BR130827TASK0002OUTPUT	C50A91_C50A52	36	Single	52	Single	0.288868	0.054291	2
BR130827TASK0002OUTPUT	C50A91_C50A52	36	Single	54	Average	-0.01918	0.900482	2
BR130827TASK0002OUTPUT	C50A91_C50A52	36	Single	55	Single	-0.098213	0.520971	2
BR130827TASK0002OUTPUT	C50A91_C50A52	36	Single	6	Single	-0.035196	0.820571	1
BR130827TASK0002OUTPUT	C50A91_C50A52	36	Single	68	Single	-0.024879	0.871132	1
BR130827TASK0002OUTPUT	C50A91_C50A52	36	Single	7	Single	0.192523	0.205143	1
BR130827TASK0002OUTPUT	C50A91_C50A52	36	Single	8	Single	0.04525	0.767877	1
BR130827TASK0002OUTPUT	C50A91_C50A52	36	Single	80	Single	-0.116053	0.447751	1
BR130827TASK0002OUTPUT	C50A91_C50A52	36	Single	81	Single	-0.146983	0.3353	2
BR130827TASK0002OUTPUT	C50A91_C50A52	37	Single	42	Single	-0.089379	0.568696	2
BR130827TASK0002OUTPUT	C50A91_C50A52	37	Single	43	Single	-0.043868	0.777373	2
BR130827TASK0002OUTPUT	C50A91_C50A52	37	Single	44	Single	-0.176249	0.252443	2
BR130827TASK0002OUTPUT	C50A91_C50A52	37	Single	45	Single	-0.10747	0.492742	2
BR130827TASK0002OUTPUT	C50A91_C50A52	37	Single	46	Single	-0.373097	0.0126171	2
BR130827TASK0002OUTPUT	C50A91_C50A52	37	Single	48	Single	-0.209698	0.171882	2
BR130827TASK0002OUTPUT	C50A91_C50A52	37	Single	49	Single	-0.034169	0.825723	2
BR130827TASK0002OUTPUT	C50A91_C50A52	37	Single	5	Single	0.069789	0.6526	1
BR130827TASK0002OUTPUT	C50A91_C50A52	37	Single	50	Single	0.037449	0.809292	2
BR130827TASK0002OUTPUT	C50A91_C50A52	37	Single	51	Average	-0.001203	0.993818	2
BR130827TASK0002OUTPUT	C50A91_C50A52	37	Single	52	Single	-0.078488	0.61256	2
BR130827TASK0002OUTPUT	C50A91_C50A52	37	Single	54	Average	-0.105692	0.494724	2
BR130827TASK0002OUTPUT	C50A91_C50A52	37	Single	55	Single	0.022408	0.885201	2
BR130827TASK0002OUTPUT	C50A91_C50A52	37	Single	6	Single	0.108304	0.489374	1
BR130827TASK0002OUTPUT	C50A91_C50A52	37	Single	68	Single	0.025183	0.871099	1
BR130827TASK0002OUTPUT	C50A91_C50A52	37	Single	7	Single	-0.038962	0.801737	1
BR130827TASK0002OUTPUT	C50A91_C50A52	37	Single	8	Single	-0.012727	0.934649	1
BR130827TASK0002OUTPUT	C50A91_C50A52	37	Single	80	Single	-0.177592	0.248788	1
BR130827TASK0002OUTPUT	C50A91_C50A52	37	Single	81	Single	-0.162165	0.292938	2
BR130827TASK0002OUTPUT	C50A91_C50A52	42	Single	43	Single	0.235028	0.124607	1
BR130827TASK0002OUTPUT	C50A91_C50A52	42	Single	44	Single	0.340309	0.0238024	1
BR130827TASK0002OUTPUT	C50A91_C50A52	42	Single	45	Single	-0.119492	0.445338	1
BR130827TASK0002OUTPUT	C50A91_C50A52	42	Single	46	Single	0.075173	0.627697	1
BR130827TASK0002OUTPUT	C50A91_C50A52	42	Single	48	Single	-0.031368	0.839813	1
BR130827TASK0002OUTPUT	C50A91_C50A52	42	Single	49	Single	0.017238	0.911568	1
BR130827TASK0002OUTPUT	C50A91_C50A52	42	Single	5	Single	-0.267799	0.0788336	2
BR130827TASK0002OUTPUT	C50A91_C50A52	42	Single	50	Single	0.016591	0.914877	1
BR130827TASK0002OUTPUT	C50A91_C50A52	42	Single	51	Average	-0.062079	0.688923	1
BR130827TASK0002OUTPUT	C50A91_C50A52	42	Single	52	Single	0.211948	0.167223	1
BR130827TASK0002OUTPUT	C50A91_C50A52	42	Single	54	Average	0.227671	0.137195	1
BR130827TASK0002OUTPUT	C50A91_C50A52	42	Single	55	Single	0.059752	0.700027	1
BR130827TASK0002OUTPUT	C50A91_C50A52	42	Single	6	Single	-0.109504	0.484543	2
BR130827TASK0002OUTPUT	C50A91_C50A52	42	Single	68	Single	0.302689	0.0458104	2
BR130827TASK0002OUTPUT	C50A91_C50A52	42	Single	7	Single	0.091393	0.555181	2
BR130827TASK0002OUTPUT	C50A91_C50A52	42	Single	8	Single	-0.078184	0.61394	2
BR130827TASK0002OUTPUT	C50A91_C50A52	42	Single	80	Single	-0.079984	0.60578	2
BR130827TASK0002OUTPUT	C50A91_C50A52	42	Single	81	Single	0.154838	0.31558	1
BR130827TASK0002OUTPUT	C50A91_C50A52	43	Single	44	Single	0.127827	0.402703	1
BR130827TASK0002OUTPUT	C50A91_C50A52	43	Single	45	Single	-0.182686	0.235254	1
BR130827TASK0002OUTPUT	C50A91_C50A52	43	Single	46	Single	0.20779	0.170788	1
BR130827TASK0002OUTPUT	C50A91_C50A52	43	Single	48	Single	0.152114	0.318513	1
BR130827TASK0002OUTPUT	C50A91_C50A52	43	Single	49	Single	0.107432	0.482407	1
BR130827TASK0002OUTPUT	C50A91_C50A52	43	Single	5	Single	-0.041504	0.786622	2
BR130827TASK0002OUTPUT	C50A91_C50A52	43	Single	50	Single	0.094555	0.536684	1
BR130827TASK0002OUTPUT	C50A91_C50A52	43	Single	51	Average	-0.063563	0.678279	1
BR130827TASK0002OUTPUT	C50A91_C50A52	43	Single	52	Single	-0.173949	0.253126	1
BR130827TASK0002OUTPUT	C50A91_C50A52	43	Single	54	Average	0.226654	0.134337	1
BR130827TASK0002OUTPUT	C50A91_C50A52	43	Single	55	Single	-0.130312	0.393546	1
BR130827TASK0002OUTPUT	C50A91_C50A52	43	Single	6	Single	-0.040925	0.791962	2
BR130827TASK0002OUTPUT	C50A91_C50A52	43	Single	68	Single	-0.05643	0.712735	2
BR130827TASK0002OUTPUT	C50A91_C50A52	43	Single	7	Single	-0.097127	0.525612	2
BR130827TASK0002OUTPUT	C50A91_C50A52	43	Single	8	Single	-0.49306	0.000579155	2
BR130827TASK0002OUTPUT	C50A91_C50A52	43	Single	80	Single	-0.110261	0.470884	2
BR130827TASK0002OUTPUT	C50A91_C50A52	43	Single	81	Single	0.094076	0.538761	1
BR130827TASK0002OUTPUT	C50A91_C50A52	44	Single	45	Single	-0.13117	0.396041	1
BR130827TASK0002OUTPUT	C50A91_C50A52	44	Single	46	Single	-0.163934	0.281903	1
BR130827TASK0002OUTPUT	C50A91_C50A52	44	Single	48	Single	0.0556	0.716785	1
BR130827TASK0002OUTPUT	C50A91_C50A52	44	Single	49	Single	0.050337	0.742626	1
BR130827TASK0002OUTPUT	C50A91_C50A52	44	Single	5	Single	0.018414	0.904436	2
BR130827TASK0002OUTPUT	C50A91_C50A52	44	Single	50	Single	0.118921	0.43653	1
BR130827TASK0002OUTPUT	C50A91_C50A52	44	Single	51	Average	-0.137821	0.366615	1
BR130827TASK0002OUTPUT	C50A91_C50A52	44	Single	52	Single	0.086253	0.573181	1
BR130827TASK0002OUTPUT	C50A91_C50A52	44	Single	54	Average	0.378804	0.0102878	1
BR130827TASK0002OUTPUT	C50A91_C50A52	44	Single	55	Single	-0.131344	0.389776	1
BR130827TASK0002OUTPUT	C50A91_C50A52	44	Single	6	Single	-0.359117	0.0166657	2
BR130827TASK0002OUTPUT	C50A91_C50A52	44	Single	68	Single	0.218206	0.149869	2
BR130827TASK0002OUTPUT	C50A91_C50A52	44	Single	7	Single	-0.173365	0.254749	2
BR130827TASK0002OUTPUT	C50A91_C50A52	44	Single	8	Single	-0.148936	0.328846	2
BR130827TASK0002OUTPUT	C50A91_C50A52	44	Single	80	Single	-0.0033	0.982836	2
BR130827TASK0002OUTPUT	C50A91_C50A52	44	Single	81	Single	0.288958	0.054213	1
BR130827TASK0002OUTPUT	C50A91_C50A52	45	Single	46	Single	0.212569	0.165954	1
BR130827TASK0002OUTPUT	C50A91_C50A52	45	Single	48	Single	0.180612	0.240702	1
BR130827TASK0002OUTPUT	C50A91_C50A52	45	Single	49	Single	0.113603	0.462799	1
BR130827TASK0002OUTPUT	C50A91_C50A52	45	Single	5	Single	-0.082791	0.593148	2
BR130827TASK0002OUTPUT	C50A91_C50A52	45	Single	50	Single	-0.253483	0.096864	1
BR130827TASK0002OUTPUT	C50A91_C50A52	45	Single	51	Average	0.094535	0.541601	1
BR130827TASK0002OUTPUT	C50A91_C50A52	45	Single	52	Single	-0.012056	0.938092	1
BR130827TASK0002OUTPUT	C50A91_C50A52	45	Single	54	Average	0.086558	0.576378	1
BR130827TASK0002OUTPUT	C50A91_C50A52	45	Single	55	Single	-0.016669	0.914477	1
BR130827TASK0002OUTPUT	C50A91_C50A52	45	Single	6	Single	-0.384928	0.010809	2
BR130827TASK0002OUTPUT	C50A91_C50A52	45	Single	68	Single	-0.117589	0.447144	2
BR130827TASK0002OUTPUT	C50A91_C50A52	45	Single	7	Single	0.219533	0.152192	2
BR130827TASK0002OUTPUT	C50A91_C50A52	45	Single	8	Single	-0.179261	0.244297	2
BR130827TASK0002OUTPUT	C50A91_C50A52	45	Single	80	Single	0.107274	0.488251	2
BR130827TASK0002OUTPUT	C50A91_C50A52	45	Single	81	Single	-0.157192	0.30819	1
BR130827TASK0002OUTPUT	C50A91_C50A52	46	Single	48	Single	0.155002	0.309303	1
BR130827TASK0002OUTPUT	C50A91_C50A52	46	Single	49	Single	0.027043	0.860031	1
BR130827TASK0002OUTPUT	C50A91_C50A52	46	Single	5	Single	0.113928	0.456166	2
BR130827TASK0002OUTPUT	C50A91_C50A52	46	Single	50	Single	-0.073585	0.630955	1
BR130827TASK0002OUTPUT	C50A91_C50A52	46	Single	51	Average	-0.006338	0.96704	1
BR130827TASK0002OUTPUT	C50A91_C50A52	46	Single	52	Single	0.012544	0.934818	1
BR130827TASK0002OUTPUT	C50A91_C50A52	46	Single	54	Average	0.327243	0.0282176	1
BR130827TASK0002OUTPUT	C50A91_C50A52	46	Single	55	Single	0.268289	0.0747623	1
BR130827TASK0002OUTPUT	C50A91_C50A52	46	Single	6	Single	-0.104822	0.498301	2
BR130827TASK0002OUTPUT	C50A91_C50A52	46	Single	68	Single	-0.163194	0.28411	2
BR130827TASK0002OUTPUT	C50A91_C50A52	46	Single	7	Single	0.28082	0.0616804	2
BR130827TASK0002OUTPUT	C50A91_C50A52	46	Single	8	Single	-0.121458	0.426737	2
BR130827TASK0002OUTPUT	C50A91_C50A52	46	Single	80	Single	0.098613	0.519268	2
BR130827TASK0002OUTPUT	C50A91_C50A52	46	Single	81	Single	0.088511	0.563146	1
BR130827TASK0002OUTPUT	C50A91_C50A52	48	Single	49	Single	0.487888	0.000674696	1
BR130827TASK0002OUTPUT	C50A91_C50A52	48	Single	5	Single	-0.069799	0.648674	2
BR130827TASK0002OUTPUT	C50A91_C50A52	48	Single	50	Single	0.225759	0.135923	1
BR130827TASK0002OUTPUT	C50A91_C50A52	48	Single	51	Average	0.346158	0.0198444	1
BR130827TASK0002OUTPUT	C50A91_C50A52	48	Single	52	Single	0.111611	0.465436	1
BR130827TASK0002OUTPUT	C50A91_C50A52	48	Single	54	Average	0.263482	0.080325	1
BR130827TASK0002OUTPUT	C50A91_C50A52	48	Single	55	Single	-0.043376	0.777237	1
BR130827TASK0002OUTPUT	C50A91_C50A52	48	Single	6	Single	-0.121836	0.430789	2
BR130827TASK0002OUTPUT	C50A91_C50A52	48	Single	68	Single	-0.363553	0.014096	2
BR130827TASK0002OUTPUT	C50A91_C50A52	48	Single	7	Single	0.286422	0.0564575	2
BR130827TASK0002OUTPUT	C50A91_C50A52	48	Single	8	Single	-0.064077	0.675817	2
BR130827TASK0002OUTPUT	C50A91_C50A52	48	Single	80	Single	-0.060905	0.691049	2
BR130827TASK0002OUTPUT	C50A91_C50A52	48	Single	81	Single	-0.004679	0.975665	1
BR130827TASK0002OUTPUT	C50A91_C50A52	49	Single	5	Single	-0.026912	0.860702	2
BR130827TASK0002OUTPUT	C50A91_C50A52	49	Single	50	Single	0.155762	0.306907	1
BR130827TASK0002OUTPUT	C50A91_C50A52	49	Single	51	Average	0.209566	0.167079	1
BR130827TASK0002OUTPUT	C50A91_C50A52	49	Single	52	Single	0.334619	0.0246572	1
BR130827TASK0002OUTPUT	C50A91_C50A52	49	Single	54	Average	0.222491	0.141833	1
BR130827TASK0002OUTPUT	C50A91_C50A52	49	Single	55	Single	0.141301	0.354518	1
BR130827TASK0002OUTPUT	C50A91_C50A52	49	Single	6	Single	-0.253803	0.0964287	2
BR130827TASK0002OUTPUT	C50A91_C50A52	49	Single	68	Single	-0.134504	0.378372	2
BR130827TASK0002OUTPUT	C50A91_C50A52	49	Single	7	Single	0.048638	0.751031	2
BR130827TASK0002OUTPUT	C50A91_C50A52	49	Single	8	Single	-0.097208	0.525265	2
BR130827TASK0002OUTPUT	C50A91_C50A52	49	Single	80	Single	-0.056413	0.712819	2
BR130827TASK0002OUTPUT	C50A91_C50A52	49	Single	81	Single	-0.048237	0.753019	1
BR130827TASK0002OUTPUT	C50A91_C50A52	5	Single	50	Single	-0.059387	0.698375	2
BR130827TASK0002OUTPUT	C50A91_C50A52	5	Single	51	Average	0.004846	0.974797	2
BR130827TASK0002OUTPUT	C50A91_C50A52	5	Single	52	Single	-0.11651	0.445954	2
BR130827TASK0002OUTPUT	C50A91_C50A52	5	Single	54	Average	0.027886	0.855709	2
BR130827TASK0002OUTPUT	C50A91_C50A52	5	Single	55	Single	0.019756	0.897507	2
BR130827TASK0002OUTPUT	C50A91_C50A52	5	Single	6	Single	0.131654	0.394286	1
BR130827TASK0002OUTPUT	C50A91_C50A52	5	Single	68	Single	-0.161497	0.289216	1
BR130827TASK0002OUTPUT	C50A91_C50A52	5	Single	7	Single	-0.016482	0.914424	1
BR130827TASK0002OUTPUT	C50A91_C50A52	5	Single	8	Single	0.068256	0.65595	1
BR130827TASK0002OUTPUT	C50A91_C50A52	5	Single	80	Single	-0.046145	0.763415	1
BR130827TASK0002OUTPUT	C50A91_C50A52	5	Single	81	Single	0.066657	0.663526	2
BR130827TASK0002OUTPUT	C50A91_C50A52	50	Single	51	Average	0.120911	0.428837	1
BR130827TASK0002OUTPUT	C50A91_C50A52	50	Single	52	Single	0.059027	0.700121	1
BR130827TASK0002OUTPUT	C50A91_C50A52	50	Single	54	Average	-0.054248	0.723391	1
BR130827TASK0002OUTPUT	C50A91_C50A52	50	Single	55	Single	0.043247	0.777883	1
BR130827TASK0002OUTPUT	C50A91_C50A52	50	Single	6	Single	0.034921	0.821951	2
BR130827TASK0002OUTPUT	C50A91_C50A52	50	Single	68	Single	-0.263743	0.0800147	2
BR130827TASK0002OUTPUT	C50A91_C50A52	50	Single	7	Single	-0.036207	0.813337	2
BR130827TASK0002OUTPUT	C50A91_C50A52	50	Single	8	Single	0.25959	0.0850629	2
BR130827TASK0002OUTPUT	C50A91_C50A52	50	Single	80	Single	-0.052147	0.733707	2
BR130827TASK0002OUTPUT	C50A91_C50A52	50	Single	81	Single	0.198396	0.191397	1
BR130827TASK0002OUTPUT	C50A91_C50A52	51	Average	52	Single	0.071083	0.64264	1
BR130827TASK0002OUTPUT	C50A91_C50A52	51	Average	54	Average	-0.076493	0.61748	1
BR130827TASK0002OUTPUT	C50A91_C50A52	51	Average	55	Single	0.218018	0.150228	1
BR130827TASK0002OUTPUT	C50A91_C50A52	51	Average	6	Single	0.055638	0.719811	2
BR130827TASK0002OUTPUT	C50A91_C50A52	51	Average	68	Single	0.099469	0.515629	2
BR130827TASK0002OUTPUT	C50A91_C50A52	51	Average	7	Single	0.129488	0.396568	2
BR130827TASK0002OUTPUT	C50A91_C50A52	51	Average	8	Single	-0.085119	0.578254	2
BR130827TASK0002OUTPUT	C50A91_C50A52	51	Average	80	Single	0.057563	0.707223	2
BR130827TASK0002OUTPUT	C50A91_C50A52	51	Average	81	Single	-0.019734	0.89762	1
BR130827TASK0002OUTPUT	C50A91_C50A52	52	Single	54	Average	0.162419	0.286434	1
BR130827TASK0002OUTPUT	C50A91_C50A52	52	Single	55	Single	-0.014488	0.924744	1
BR130827TASK0002OUTPUT	C50A91_C50A52	52	Single	6	Single	-0.166377	0.280413	2
BR130827TASK0002OUTPUT	C50A91_C50A52	52	Single	68	Single	-0.102638	0.502274	2
BR130827TASK0002OUTPUT	C50A91_C50A52	52	Single	7	Single	0.031446	0.837527	2
BR130827TASK0002OUTPUT	C50A91_C50A52	52	Single	8	Single	0.055523	0.717161	2
BR130827TASK0002OUTPUT	C50A91_C50A52	52	Single	80	Single	0.14967	0.326441	2
BR130827TASK0002OUTPUT	C50A91_C50A52	52	Single	81	Single	0.177751	0.24274	1
BR130827TASK0002OUTPUT	C50A91_C50A52	54	Average	55	Single	-0.094709	0.536018	1
BR130827TASK0002OUTPUT	C50A91_C50A52	54	Average	6	Single	-0.210608	0.169987	2
BR130827TASK0002OUTPUT	C50A91_C50A52	54	Average	68	Single	-0.05911	0.69972	2
BR130827TASK0002OUTPUT	C50A91_C50A52	54	Average	7	Single	-0.095676	0.531846	2
BR130827TASK0002OUTPUT	C50A91_C50A52	54	Average	8	Single	-0.166504	0.274322	2
BR130827TASK0002OUTPUT	C50A91_C50A52	54	Average	80	Single	-0.117209	0.44321	2
BR130827TASK0002OUTPUT	C50A91_C50A52	54	Average	81	Single	0.302929	0.0431011	1
BR130827TASK0002OUTPUT	C50A91_C50A52	55	Single	6	Single	-0.211279	0.168598	2
BR130827TASK0002OUTPUT	C50A91_C50A52	55	Single	68	Single	0.097523	0.523919	2
BR130827TASK0002OUTPUT	C50A91_C50A52	55	Single	7	Single	0.209273	0.167687	2
BR130827TASK0002OUTPUT	C50A91_C50A52	55	Single	8	Single	0.08384	0.583999	2
BR130827TASK0002OUTPUT	C50A91_C50A52	55	Single	80	Single	0.004705	0.975532	2
BR130827TASK0002OUTPUT	C50A91_C50A52	55	Single	81	Single	0.044637	0.770933	1
BR130827TASK0002OUTPUT	C50A91_C50A52	6	Single	68	Single	0.026839	0.862701	1
BR130827TASK0002OUTPUT	C50A91_C50A52	6	Single	7	Single	-0.140474	0.363088	1
BR130827TASK0002OUTPUT	C50A91_C50A52	6	Single	8	Single	0.393969	0.00814435	1
BR130827TASK0002OUTPUT	C50A91_C50A52	6	Single	80	Single	-0.10698	0.48945	1
BR130827TASK0002OUTPUT	C50A91_C50A52	6	Single	81	Single	0.161818	0.293988	2
BR130827TASK0002OUTPUT	C50A91_C50A52	68	Single	7	Single	-0.145584	0.33997	1
BR130827TASK0002OUTPUT	C50A91_C50A52	68	Single	8	Single	-0.091446	0.550219	1
BR130827TASK0002OUTPUT	C50A91_C50A52	68	Single	80	Single	-0.060194	0.694477	1
BR130827TASK0002OUTPUT	C50A91_C50A52	68	Single	81	Single	-0.011074	0.942447	2
BR130827TASK0002OUTPUT	C50A91_C50A52	7	Single	8	Single	-0.094147	0.538452	1
BR130827TASK0002OUTPUT	C50A91_C50A52	7	Single	80	Single	-0.216174	0.153793	1
BR130827TASK0002OUTPUT	C50A91_C50A52	7	Single	81	Single	-0.138071	0.365737	2
BR130827TASK0002OUTPUT	C50A91_C50A52	8	Single	80	Single	-0.020645	0.892922	1
BR130827TASK0002OUTPUT	C50A91_C50A52	8	Single	81	Single	0.140384	0.357683	2
BR130827TASK0002OUTPUT	C50A91_C50A52	80	Single	81	Single	-0.030981	0.839895	2
BR130902TASK0001OUTPUT	C50A51_C50A92	1	Single	10	Single	0.096776	0.568814	1
BR130902TASK0001OUTPUT	C50A51_C50A92	1	Single	11	Average	0.17216	0.30825	1
BR130902TASK0001OUTPUT	C50A51_C50A92	1	Single	2	Single	0.226484	0.177673	1
BR130902TASK0001OUTPUT	C50A51_C50A92	1	Single	3	Single	0.241804	0.149344	1
BR130902TASK0001OUTPUT	C50A51_C50A92	1	Single	33	Single	0.111944	0.509488	1
BR130902TASK0001OUTPUT	C50A51_C50A92	1	Single	34	Single	0.043222	0.799492	1
BR130902TASK0001OUTPUT	C50A51_C50A92	1	Single	35	Mixture	-0.045777	0.790925	1
BR130902TASK0001OUTPUT	C50A51_C50A92	1	Single	36	Single	0.000833	0.996096	1
BR130902TASK0001OUTPUT	C50A51_C50A92	1	Single	37	Mixture	-0.114681	0.499122	1
BR130902TASK0001OUTPUT	C50A51_C50A92	1	Single	41	Single	0.00817	0.961721	2
BR130902TASK0001OUTPUT	C50A51_C50A92	1	Single	42	Single	-0.164399	0.330894	2
BR130902TASK0001OUTPUT	C50A51_C50A92	1	Single	44	Single	-0.047404	0.780545	2
BR130902TASK0001OUTPUT	C50A51_C50A92	1	Single	47	Average	-0.057525	0.735226	2
BR130902TASK0001OUTPUT	C50A51_C50A92	1	Single	48	Single	-0.007267	0.965953	2
BR130902TASK0001OUTPUT	C50A51_C50A92	1	Single	50	Single	0.160586	0.342386	2
BR130902TASK0001OUTPUT	C50A51_C50A92	1	Single	51	Single	0.181271	0.282952	2
BR130902TASK0001OUTPUT	C50A51_C50A92	1	Single	52	Single	-0.029572	0.862068	2
BR130902TASK0001OUTPUT	C50A51_C50A92	1	Single	53	Single	0.057835	0.73385	2
BR130902TASK0001OUTPUT	C50A51_C50A92	1	Single	54	Single	0.222363	0.185905	2
BR130902TASK0001OUTPUT	C50A51_C50A92	1	Single	55	Single	0.202456	0.229473	2
BR130902TASK0001OUTPUT	C50A51_C50A92	1	Single	58	Single	0.020087	0.906068	2
BR130902TASK0001OUTPUT	C50A51_C50A92	1	Single	6	Single	-0.003016	0.985865	1
BR130902TASK0001OUTPUT	C50A51_C50A92	1	Single	65	Single	-0.102908	0.544454	1
BR130902TASK0001OUTPUT	C50A51_C50A92	1	Single	66	Single	0.074123	0.662837	1
BR130902TASK0001OUTPUT	C50A51_C50A92	1	Single	7	Average	0.084098	0.620694	1
BR130902TASK0001OUTPUT	C50A51_C50A92	1	Single	8	Single	-0.033586	0.843563	1
BR130902TASK0001OUTPUT	C50A51_C50A92	1	Single	81	Single	0.018653	0.912745	2
BR130902TASK0001OUTPUT	C50A51_C50A92	1	Single	9	Mixture	0.23551	0.160553	1
BR130902TASK0001OUTPUT	C50A51_C50A92	10	Single	11	Average	0.013957	0.934658	1
BR130902TASK0001OUTPUT	C50A51_C50A92	10	Single	2	Single	0.178031	0.291791	1
BR130902TASK0001OUTPUT	C50A51_C50A92	10	Single	3	Single	0.053516	0.753081	1
BR130902TASK0001OUTPUT	C50A51_C50A92	10	Single	33	Single	-0.058327	0.731672	1
BR130902TASK0001OUTPUT	C50A51_C50A92	10	Single	34	Single	0.133862	0.429604	1
BR130902TASK0001OUTPUT	C50A51_C50A92	10	Single	35	Mixture	0.170731	0.319459	1
BR130902TASK0001OUTPUT	C50A51_C50A92	10	Single	36	Single	0.033607	0.843466	1
BR130902TASK0001OUTPUT	C50A51_C50A92	10	Single	37	Mixture	-0.071861	0.672545	1
BR130902TASK0001OUTPUT	C50A51_C50A92	10	Single	41	Single	-0.107454	0.526722	2
BR130902TASK0001OUTPUT	C50A51_C50A92	10	Single	42	Single	-0.097119	0.567435	2
BR130902TASK0001OUTPUT	C50A51_C50A92	10	Single	44	Single	-0.274943	0.0995729	2
BR130902TASK0001OUTPUT	C50A51_C50A92	10	Single	47	Average	-0.048176	0.777061	2
BR130902TASK0001OUTPUT	C50A51_C50A92	10	Single	48	Single	0.041763	0.806129	2
BR130902TASK0001OUTPUT	C50A51_C50A92	10	Single	50	Single	0.14248	0.400219	2
BR130902TASK0001OUTPUT	C50A51_C50A92	10	Single	51	Single	0.136232	0.421408	2
BR130902TASK0001OUTPUT	C50A51_C50A92	10	Single	52	Single	0.013433	0.937104	2
BR130902TASK0001OUTPUT	C50A51_C50A92	10	Single	53	Single	-0.297412	0.0738253	2
BR130902TASK0001OUTPUT	C50A51_C50A92	10	Single	54	Single	-0.24111	0.150551	2
BR130902TASK0001OUTPUT	C50A51_C50A92	10	Single	55	Single	0.190018	0.259969	2
BR130902TASK0001OUTPUT	C50A51_C50A92	10	Single	58	Single	-0.217648	0.195651	2
BR130902TASK0001OUTPUT	C50A51_C50A92	10	Single	6	Single	0.159156	0.346758	1
BR130902TASK0001OUTPUT	C50A51_C50A92	10	Single	65	Single	0.097476	0.566008	1
BR130902TASK0001OUTPUT	C50A51_C50A92	10	Single	66	Single	-0.111871	0.509767	1
BR130902TASK0001OUTPUT	C50A51_C50A92	10	Single	7	Average	-0.226547	0.177549	1
BR130902TASK0001OUTPUT	C50A51_C50A92	10	Single	8	Single	-0.026973	0.874086	1
BR130902TASK0001OUTPUT	C50A51_C50A92	10	Single	81	Single	-0.202646	0.229027	2
BR130902TASK0001OUTPUT	C50A51_C50A92	10	Single	9	Mixture	-0.024151	0.887174	1
BR130902TASK0001OUTPUT	C50A51_C50A92	11	Average	2	Single	0.156341	0.355462	1
BR130902TASK0001OUTPUT	C50A51_C50A92	11	Average	3	Single	-0.021615	0.898957	1
BR130902TASK0001OUTPUT	C50A51_C50A92	11	Average	33	Single	-0.118359	0.485365	1
BR130902TASK0001OUTPUT	C50A51_C50A92	11	Average	34	Single	0.170834	0.312049	1
BR130902TASK0001OUTPUT	C50A51_C50A92	11	Average	35	Mixture	0.055502	0.747825	1
BR130902TASK0001OUTPUT	C50A51_C50A92	11	Average	36	Single	-0.227351	0.175975	1
BR130902TASK0001OUTPUT	C50A51_C50A92	11	Average	37	Mixture	0.13265	0.43383	1
BR130902TASK0001OUTPUT	C50A51_C50A92	11	Average	41	Single	0.232512	0.166103	2
BR130902TASK0001OUTPUT	C50A51_C50A92	11	Average	42	Single	0.031372	0.853757	2
BR130902TASK0001OUTPUT	C50A51_C50A92	11	Average	44	Single	0.045505	0.789137	2
BR130902TASK0001OUTPUT	C50A51_C50A92	11	Average	47	Average	0.111312	0.511896	2
BR130902TASK0001OUTPUT	C50A51_C50A92	11	Average	48	Single	-0.121682	0.473108	2
BR130902TASK0001OUTPUT	C50A51_C50A92	11	Average	50	Single	0.109778	0.517764	2
BR130902TASK0001OUTPUT	C50A51_C50A92	11	Average	51	Single	0.509273	0.00128558	2
BR130902TASK0001OUTPUT	C50A51_C50A92	11	Average	52	Single	0.233843	0.163622	2
BR130902TASK0001OUTPUT	C50A51_C50A92	11	Average	53	Single	0.30058	0.0706592	2
BR130902TASK0001OUTPUT	C50A51_C50A92	11	Average	54	Single	0.164623	0.330225	2
BR130902TASK0001OUTPUT	C50A51_C50A92	11	Average	55	Single	0.165464	0.327728	2
BR130902TASK0001OUTPUT	C50A51_C50A92	11	Average	58	Single	0.081836	0.630151	2
BR130902TASK0001OUTPUT	C50A51_C50A92	11	Average	6	Single	-0.216028	0.199081	1
BR130902TASK0001OUTPUT	C50A51_C50A92	11	Average	65	Single	-0.165854	0.326572	1
BR130902TASK0001OUTPUT	C50A51_C50A92	11	Average	66	Single	0.137086	0.418473	1
BR130902TASK0001OUTPUT	C50A51_C50A92	11	Average	7	Average	-0.107129	0.527978	1
BR130902TASK0001OUTPUT	C50A51_C50A92	11	Average	8	Single	0.037034	0.827733	1
BR130902TASK0001OUTPUT	C50A51_C50A92	11	Average	81	Single	0.0901	0.595885	2
BR130902TASK0001OUTPUT	C50A51_C50A92	11	Average	9	Mixture	0.179508	0.287741	1
BR130902TASK0001OUTPUT	C50A51_C50A92	2	Single	3	Single	0.023157	0.891787	1
BR130902TASK0001OUTPUT	C50A51_C50A92	2	Single	33	Single	-0.072394	0.670253	1
BR130902TASK0001OUTPUT	C50A51_C50A92	2	Single	34	Single	0.213133	0.205316	1
BR130902TASK0001OUTPUT	C50A51_C50A92	2	Single	35	Mixture	-0.092987	0.589607	1
BR130902TASK0001OUTPUT	C50A51_C50A92	2	Single	36	Single	-0.249255	0.136826	1
BR130902TASK0001OUTPUT	C50A51_C50A92	2	Single	37	Mixture	-0.012674	0.940652	1
BR130902TASK0001OUTPUT	C50A51_C50A92	2	Single	41	Single	0.179738	0.287112	2
BR130902TASK0001OUTPUT	C50A51_C50A92	2	Single	42	Single	-0.16919	0.316799	2
BR130902TASK0001OUTPUT	C50A51_C50A92	2	Single	44	Single	-0.061259	0.718717	2
BR130902TASK0001OUTPUT	C50A51_C50A92	2	Single	47	Average	0.117127	0.489951	2
BR130902TASK0001OUTPUT	C50A51_C50A92	2	Single	48	Single	0.085816	0.613547	2
BR130902TASK0001OUTPUT	C50A51_C50A92	2	Single	50	Single	0.225667	0.179283	2
BR130902TASK0001OUTPUT	C50A51_C50A92	2	Single	51	Single	0.169819	0.314974	2
BR130902TASK0001OUTPUT	C50A51_C50A92	2	Single	52	Single	-0.101231	0.551065	2
BR130902TASK0001OUTPUT	C50A51_C50A92	2	Single	53	Single	-0.262298	0.116803	2
BR130902TASK0001OUTPUT	C50A51_C50A92	2	Single	54	Single	0.03511	0.836556	2
BR130902TASK0001OUTPUT	C50A51_C50A92	2	Single	55	Single	0.311557	0.0605034	2
BR130902TASK0001OUTPUT	C50A51_C50A92	2	Single	58	Single	-0.089138	0.599833	2
BR130902TASK0001OUTPUT	C50A51_C50A92	2	Single	6	Single	0.164716	0.32995	1
BR130902TASK0001OUTPUT	C50A51_C50A92	2	Single	65	Single	0.029908	0.860517	1
BR130902TASK0001OUTPUT	C50A51_C50A92	2	Single	66	Single	0.147788	0.382711	1
BR130902TASK0001OUTPUT	C50A51_C50A92	2	Single	7	Average	-0.114865	0.498431	1
BR130902TASK0001OUTPUT	C50A51_C50A92	2	Single	8	Single	0.358644	0.0292752	1
BR130902TASK0001OUTPUT	C50A51_C50A92	2	Single	81	Single	0.432003	0.00758456	2
BR130902TASK0001OUTPUT	C50A51_C50A92	2	Single	9	Mixture	0.093581	0.5817	1
BR130902TASK0001OUTPUT	C50A51_C50A92	3	Single	33	Single	0.048226	0.776835	1
BR130902TASK0001OUTPUT	C50A51_C50A92	3	Single	34	Single	0.167544	0.321596	1
BR130902TASK0001OUTPUT	C50A51_C50A92	3	Single	35	Mixture	0.155608	0.36481	1
BR130902TASK0001OUTPUT	C50A51_C50A92	3	Single	36	Single	0.299033	0.0721918	1
BR130902TASK0001OUTPUT	C50A51_C50A92	3	Single	37	Mixture	0.073166	0.666937	1
BR130902TASK0001OUTPUT	C50A51_C50A92	3	Single	41	Single	-0.093515	0.581966	2
BR130902TASK0001OUTPUT	C50A51_C50A92	3	Single	42	Single	0.040789	0.81057	2
BR130902TASK0001OUTPUT	C50A51_C50A92	3	Single	44	Single	-0.014448	0.932362	2
BR130902TASK0001OUTPUT	C50A51_C50A92	3	Single	47	Average	0.100416	0.554293	2
BR130902TASK0001OUTPUT	C50A51_C50A92	3	Single	48	Single	-0.005195	0.975657	2
BR130902TASK0001OUTPUT	C50A51_C50A92	3	Single	50	Single	0.144943	0.39204	2
BR130902TASK0001OUTPUT	C50A51_C50A92	3	Single	51	Single	0.312922	0.0593266	2
BR130902TASK0001OUTPUT	C50A51_C50A92	3	Single	52	Single	-0.089788	0.597165	2
BR130902TASK0001OUTPUT	C50A51_C50A92	3	Single	53	Single	0.205899	0.22148	2
BR130902TASK0001OUTPUT	C50A51_C50A92	3	Single	54	Single	0.227388	0.175902	2
BR130902TASK0001OUTPUT	C50A51_C50A92	3	Single	55	Single	-0.185255	0.272327	2
BR130902TASK0001OUTPUT	C50A51_C50A92	3	Single	58	Single	-0.082854	0.625888	2
BR130902TASK0001OUTPUT	C50A51_C50A92	3	Single	6	Single	0.096702	0.569111	1
BR130902TASK0001OUTPUT	C50A51_C50A92	3	Single	65	Single	0.032649	0.847876	1
BR130902TASK0001OUTPUT	C50A51_C50A92	3	Single	66	Single	-0.237961	0.156119	1
BR130902TASK0001OUTPUT	C50A51_C50A92	3	Single	7	Average	0.061086	0.719482	1
BR130902TASK0001OUTPUT	C50A51_C50A92	3	Single	8	Single	-0.015625	0.926867	1
BR130902TASK0001OUTPUT	C50A51_C50A92	3	Single	81	Single	0.05045	0.766824	2
BR130902TASK0001OUTPUT	C50A51_C50A92	3	Single	9	Mixture	-0.097222	0.567025	1
BR130902TASK0001OUTPUT	C50A51_C50A92	33	Single	34	Single	0.24344	0.146527	1
BR130902TASK0001OUTPUT	C50A51_C50A92	33	Single	35	Mixture	0.448021	0.00614074	1
BR130902TASK0001OUTPUT	C50A51_C50A92	33	Single	36	Single	0.249506	0.136418	1
BR130902TASK0001OUTPUT	C50A51_C50A92	33	Single	37	Mixture	0.447202	0.00551942	1
BR130902TASK0001OUTPUT	C50A51_C50A92	33	Single	41	Single	-0.420746	0.00951247	2
BR130902TASK0001OUTPUT	C50A51_C50A92	33	Single	42	Single	-0.000403	0.998111	2
BR130902TASK0001OUTPUT	C50A51_C50A92	33	Single	44	Single	0.164616	0.330247	2
BR130902TASK0001OUTPUT	C50A51_C50A92	33	Single	47	Average	-0.0171	0.919986	2
BR130902TASK0001OUTPUT	C50A51_C50A92	33	Single	48	Single	0.023529	0.890058	2
BR130902TASK0001OUTPUT	C50A51_C50A92	33	Single	50	Single	-0.084326	0.619744	2
BR130902TASK0001OUTPUT	C50A51_C50A92	33	Single	51	Single	-0.066836	0.694294	2
BR130902TASK0001OUTPUT	C50A51_C50A92	33	Single	52	Single	0.190014	0.25998	2
BR130902TASK0001OUTPUT	C50A51_C50A92	33	Single	53	Single	-0.0118	0.944737	2
BR130902TASK0001OUTPUT	C50A51_C50A92	33	Single	54	Single	-0.066496	0.695776	2
BR130902TASK0001OUTPUT	C50A51_C50A92	33	Single	55	Single	-0.022256	0.895976	2
BR130902TASK0001OUTPUT	C50A51_C50A92	33	Single	58	Single	-0.164932	0.329307	2
BR130902TASK0001OUTPUT	C50A51_C50A92	33	Single	6	Single	-0.003881	0.981813	1
BR130902TASK0001OUTPUT	C50A51_C50A92	33	Single	65	Single	-0.222034	0.186575	1
BR130902TASK0001OUTPUT	C50A51_C50A92	33	Single	66	Single	0.293302	0.0780976	1
BR130902TASK0001OUTPUT	C50A51_C50A92	33	Single	7	Average	-0.076839	0.651253	1
BR130902TASK0001OUTPUT	C50A51_C50A92	33	Single	8	Single	-0.124218	0.463863	1
BR130902TASK0001OUTPUT	C50A51_C50A92	33	Single	81	Single	-0.170149	0.314021	2
BR130902TASK0001OUTPUT	C50A51_C50A92	33	Single	9	Mixture	-0.004076	0.9809	1
BR130902TASK0001OUTPUT	C50A51_C50A92	34	Single	35	Mixture	0.482047	0.00291035	1
BR130902TASK0001OUTPUT	C50A51_C50A92	34	Single	36	Single	0.276812	0.0972005	1
BR130902TASK0001OUTPUT	C50A51_C50A92	34	Single	37	Mixture	0.225033	0.180541	1
BR130902TASK0001OUTPUT	C50A51_C50A92	34	Single	41	Single	-0.396441	0.015134	2
BR130902TASK0001OUTPUT	C50A51_C50A92	34	Single	42	Single	0.03262	0.848006	2
BR130902TASK0001OUTPUT	C50A51_C50A92	34	Single	44	Single	-0.018067	0.915476	2
BR130902TASK0001OUTPUT	C50A51_C50A92	34	Single	47	Average	0.305792	0.0656827	2
BR130902TASK0001OUTPUT	C50A51_C50A92	34	Single	48	Single	-0.002963	0.986115	2
BR130902TASK0001OUTPUT	C50A51_C50A92	34	Single	50	Single	0.004651	0.978203	2
BR130902TASK0001OUTPUT	C50A51_C50A92	34	Single	51	Single	0.207809	0.21713	2
BR130902TASK0001OUTPUT	C50A51_C50A92	34	Single	52	Single	0.20172	0.231207	2
BR130902TASK0001OUTPUT	C50A51_C50A92	34	Single	53	Single	-0.026574	0.875935	2
BR130902TASK0001OUTPUT	C50A51_C50A92	34	Single	54	Single	-0.10334	0.542755	2
BR130902TASK0001OUTPUT	C50A51_C50A92	34	Single	55	Single	0.004209	0.980278	2
BR130902TASK0001OUTPUT	C50A51_C50A92	34	Single	58	Single	-0.226228	0.178176	2
BR130902TASK0001OUTPUT	C50A51_C50A92	34	Single	6	Single	0.11051	0.51496	1
BR130902TASK0001OUTPUT	C50A51_C50A92	34	Single	65	Single	-0.051035	0.764195	1
BR130902TASK0001OUTPUT	C50A51_C50A92	34	Single	66	Single	0.018561	0.913175	1
BR130902TASK0001OUTPUT	C50A51_C50A92	34	Single	7	Average	0.098656	0.56129	1
BR130902TASK0001OUTPUT	C50A51_C50A92	34	Single	8	Single	0.087488	0.606627	1
BR130902TASK0001OUTPUT	C50A51_C50A92	34	Single	81	Single	-0.177253	0.293937	2
BR130902TASK0001OUTPUT	C50A51_C50A92	34	Single	9	Mixture	-0.191407	0.256437	1
BR130902TASK0001OUTPUT	C50A51_C50A92	35	Mixture	36	Single	0.463893	0.00437516	1
BR130902TASK0001OUTPUT	C50A51_C50A92	35	Mixture	37	Mixture	0.584126	0.000183818	1
BR130902TASK0001OUTPUT	C50A51_C50A92	35	Mixture	41	Single	-0.363444	0.0293449	2
BR130902TASK0001OUTPUT	C50A51_C50A92	35	Mixture	42	Single	0.150849	0.379841	2
BR130902TASK0001OUTPUT	C50A51_C50A92	35	Mixture	44	Single	0.051264	0.766525	2
BR130902TASK0001OUTPUT	C50A51_C50A92	35	Mixture	47	Average	-0.202913	0.235263	2
BR130902TASK0001OUTPUT	C50A51_C50A92	35	Mixture	48	Single	-0.15793	0.357609	2
BR130902TASK0001OUTPUT	C50A51_C50A92	35	Mixture	50	Single	-0.232523	0.172349	2
BR130902TASK0001OUTPUT	C50A51_C50A92	35	Mixture	51	Single	0.10625	0.537399	2
BR130902TASK0001OUTPUT	C50A51_C50A92	35	Mixture	52	Single	0.113252	0.510762	2
BR130902TASK0001OUTPUT	C50A51_C50A92	35	Mixture	53	Single	-0.193582	0.257952	2
BR130902TASK0001OUTPUT	C50A51_C50A92	35	Mixture	54	Single	-0.314977	0.0613301	2
BR130902TASK0001OUTPUT	C50A51_C50A92	35	Mixture	55	Single	-0.136579	0.427028	2
BR130902TASK0001OUTPUT	C50A51_C50A92	35	Mixture	58	Single	-0.349196	0.0368474	2
BR130902TASK0001OUTPUT	C50A51_C50A92	35	Mixture	6	Single	0.115095	0.503861	1
BR130902TASK0001OUTPUT	C50A51_C50A92	35	Mixture	65	Single	-0.243366	0.152639	1
BR130902TASK0001OUTPUT	C50A51_C50A92	35	Mixture	66	Single	0.163364	0.341093	1
BR130902TASK0001OUTPUT	C50A51_C50A92	35	Mixture	7	Average	0.10845	0.528958	1
BR130902TASK0001OUTPUT	C50A51_C50A92	35	Mixture	8	Single	-0.156181	0.363026	1
BR130902TASK0001OUTPUT	C50A51_C50A92	35	Mixture	81	Single	-0.2499	0.141583	2
BR130902TASK0001OUTPUT	C50A51_C50A92	35	Mixture	9	Mixture	0.038397	0.824053	1
BR130902TASK0001OUTPUT	C50A51_C50A92	36	Single	37	Mixture	0.221819	0.187011	1
BR130902TASK0001OUTPUT	C50A51_C50A92	36	Single	41	Single	-0.405678	0.0127347	2
BR130902TASK0001OUTPUT	C50A51_C50A92	36	Single	42	Single	0.00533	0.975025	2
BR130902TASK0001OUTPUT	C50A51_C50A92	36	Single	44	Single	0.049265	0.772153	2
BR130902TASK0001OUTPUT	C50A51_C50A92	36	Single	47	Average	0.112861	0.506004	2
BR130902TASK0001OUTPUT	C50A51_C50A92	36	Single	48	Single	-0.431327	0.00769007	2
BR130902TASK0001OUTPUT	C50A51_C50A92	36	Single	50	Single	-0.16173	0.338913	2
BR130902TASK0001OUTPUT	C50A51_C50A92	36	Single	51	Single	0.032571	0.848232	2
BR130902TASK0001OUTPUT	C50A51_C50A92	36	Single	52	Single	-0.101825	0.548721	2
BR130902TASK0001OUTPUT	C50A51_C50A92	36	Single	53	Single	-0.013287	0.937788	2
BR130902TASK0001OUTPUT	C50A51_C50A92	36	Single	54	Single	-0.239228	0.153862	2
BR130902TASK0001OUTPUT	C50A51_C50A92	36	Single	55	Single	-0.256801	0.124954	2
BR130902TASK0001OUTPUT	C50A51_C50A92	36	Single	58	Single	-0.154083	0.36254	2
BR130902TASK0001OUTPUT	C50A51_C50A92	36	Single	6	Single	-0.054632	0.748099	1
BR130902TASK0001OUTPUT	C50A51_C50A92	36	Single	65	Single	0.140895	0.405536	1
BR130902TASK0001OUTPUT	C50A51_C50A92	36	Single	66	Single	0.028888	0.865229	1
BR130902TASK0001OUTPUT	C50A51_C50A92	36	Single	7	Average	0.198638	0.238563	1
BR130902TASK0001OUTPUT	C50A51_C50A92	36	Single	8	Single	-0.102092	0.547665	1
BR130902TASK0001OUTPUT	C50A51_C50A92	36	Single	81	Single	-0.373267	0.0228754	2
BR130902TASK0001OUTPUT	C50A51_C50A92	36	Single	9	Mixture	-0.028697	0.866111	1
BR130902TASK0001OUTPUT	C50A51_C50A92	37	Mixture	41	Single	-0.430599	0.00780506	2
BR130902TASK0001OUTPUT	C50A51_C50A92	37	Mixture	42	Single	0.045768	0.787944	2
BR130902TASK0001OUTPUT	C50A51_C50A92	37	Mixture	44	Single	0.106103	0.531962	2
BR130902TASK0001OUTPUT	C50A51_C50A92	37	Mixture	47	Average	-0.284738	0.0876167	2
BR130902TASK0001OUTPUT	C50A51_C50A92	37	Mixture	48	Single	-0.117495	0.488581	2
BR130902TASK0001OUTPUT	C50A51_C50A92	37	Mixture	50	Single	-0.332037	0.0446705	2
BR130902TASK0001OUTPUT	C50A51_C50A92	37	Mixture	51	Single	0.019506	0.908772	2
BR130902TASK0001OUTPUT	C50A51_C50A92	37	Mixture	52	Single	0.139561	0.410041	2
BR130902TASK0001OUTPUT	C50A51_C50A92	37	Mixture	53	Single	0.064926	0.702627	2
BR130902TASK0001OUTPUT	C50A51_C50A92	37	Mixture	54	Single	-0.084815	0.617706	2
BR130902TASK0001OUTPUT	C50A51_C50A92	37	Mixture	55	Single	-0.231466	0.168071	2
BR130902TASK0001OUTPUT	C50A51_C50A92	37	Mixture	58	Single	-0.143161	0.397947	2
BR130902TASK0001OUTPUT	C50A51_C50A92	37	Mixture	6	Single	-0.086232	0.611823	1
BR130902TASK0001OUTPUT	C50A51_C50A92	37	Mixture	65	Single	0.06506	0.702042	1
BR130902TASK0001OUTPUT	C50A51_C50A92	37	Mixture	66	Single	-0.092664	0.585422	1
BR130902TASK0001OUTPUT	C50A51_C50A92	37	Mixture	7	Average	-0.02603	0.878455	1
BR130902TASK0001OUTPUT	C50A51_C50A92	37	Mixture	8	Single	-0.167372	0.322102	1
BR130902TASK0001OUTPUT	C50A51_C50A92	37	Mixture	81	Single	-0.022471	0.894976	2
BR130902TASK0001OUTPUT	C50A51_C50A92	37	Mixture	9	Mixture	0.147516	0.383598	1
BR130902TASK0001OUTPUT	C50A51_C50A92	41	Single	42	Single	0.260718	0.119104	1
BR130902TASK0001OUTPUT	C50A51_C50A92	41	Single	44	Single	0.187979	0.265212	1
BR130902TASK0001OUTPUT	C50A51_C50A92	41	Single	47	Average	0.201234	0.232356	1
BR130902TASK0001OUTPUT	C50A51_C50A92	41	Single	48	Single	0.05613	0.741423	1
BR130902TASK0001OUTPUT	C50A51_C50A92	41	Single	50	Single	0.355929	0.0306115	1
BR130902TASK0001OUTPUT	C50A51_C50A92	41	Single	51	Single	0.026198	0.877679	1
BR130902TASK0001OUTPUT	C50A51_C50A92	41	Single	52	Single	-0.130004	0.443139	1
BR130902TASK0001OUTPUT	C50A51_C50A92	41	Single	53	Single	0.017217	0.919439	1
BR130902TASK0001OUTPUT	C50A51_C50A92	41	Single	54	Single	0.074299	0.662083	1
BR130902TASK0001OUTPUT	C50A51_C50A92	41	Single	55	Single	0.103508	0.542097	1
BR130902TASK0001OUTPUT	C50A51_C50A92	41	Single	58	Single	0.214154	0.203101	1
BR130902TASK0001OUTPUT	C50A51_C50A92	41	Single	6	Single	0.014634	0.931495	2
BR130902TASK0001OUTPUT	C50A51_C50A92	41	Single	65	Single	-0.016792	0.921424	2
BR130902TASK0001OUTPUT	C50A51_C50A92	41	Single	66	Single	0.227831	0.175039	2
BR130902TASK0001OUTPUT	C50A51_C50A92	41	Single	7	Average	-0.010144	0.952485	2
BR130902TASK0001OUTPUT	C50A51_C50A92	41	Single	8	Single	0.190146	0.259641	2
BR130902TASK0001OUTPUT	C50A51_C50A92	41	Single	81	Single	0.552586	0.000390548	1
BR130902TASK0001OUTPUT	C50A51_C50A92	41	Single	9	Mixture	-0.065036	0.702148	2
BR130902TASK0001OUTPUT	C50A51_C50A92	42	Single	44	Single	0.547987	0.000446655	1
BR130902TASK0001OUTPUT	C50A51_C50A92	42	Single	47	Average	0.120433	0.477697	1
BR130902TASK0001OUTPUT	C50A51_C50A92	42	Single	48	Single	0.227041	0.176581	1
BR130902TASK0001OUTPUT	C50A51_C50A92	42	Single	50	Single	0.184667	0.273877	1
BR130902TASK0001OUTPUT	C50A51_C50A92	42	Single	51	Single	0.048322	0.776404	1
BR130902TASK0001OUTPUT	C50A51_C50A92	42	Single	52	Single	0.321347	0.0524558	1
BR130902TASK0001OUTPUT	C50A51_C50A92	42	Single	53	Single	0.191272	0.256778	1
BR130902TASK0001OUTPUT	C50A51_C50A92	42	Single	54	Single	-0.00537	0.974835	1
BR130902TASK0001OUTPUT	C50A51_C50A92	42	Single	55	Single	0.106918	0.528798	1
BR130902TASK0001OUTPUT	C50A51_C50A92	42	Single	58	Single	0.053543	0.752962	1
BR130902TASK0001OUTPUT	C50A51_C50A92	42	Single	6	Single	0.069068	0.684603	2
BR130902TASK0001OUTPUT	C50A51_C50A92	42	Single	65	Single	-0.212491	0.206715	2
BR130902TASK0001OUTPUT	C50A51_C50A92	42	Single	66	Single	0.219987	0.190773	2
BR130902TASK0001OUTPUT	C50A51_C50A92	42	Single	7	Average	0.248842	0.137498	2
BR130902TASK0001OUTPUT	C50A51_C50A92	42	Single	8	Single	0.053014	0.755326	2
BR130902TASK0001OUTPUT	C50A51_C50A92	42	Single	81	Single	0.23924	0.15384	1
BR130902TASK0001OUTPUT	C50A51_C50A92	42	Single	9	Mixture	-0.135061	0.425448	2
BR130902TASK0001OUTPUT	C50A51_C50A92	44	Single	47	Average	0.142383	0.400544	1
BR130902TASK0001OUTPUT	C50A51_C50A92	44	Single	48	Single	0.175673	0.298333	1
BR130902TASK0001OUTPUT	C50A51_C50A92	44	Single	50	Single	0.101575	0.549707	1
BR130902TASK0001OUTPUT	C50A51_C50A92	44	Single	51	Single	-0.152505	0.367536	1
BR130902TASK0001OUTPUT	C50A51_C50A92	44	Single	52	Single	0.166819	0.323726	1
BR130902TASK0001OUTPUT	C50A51_C50A92	44	Single	53	Single	0.090509	0.594212	1
BR130902TASK0001OUTPUT	C50A51_C50A92	44	Single	54	Single	0.130423	0.441656	1
BR130902TASK0001OUTPUT	C50A51_C50A92	44	Single	55	Single	0.201275	0.232258	1
BR130902TASK0001OUTPUT	C50A51_C50A92	44	Single	58	Single	0.04641	0.785038	1
BR130902TASK0001OUTPUT	C50A51_C50A92	44	Single	6	Single	0.100611	0.553521	2
BR130902TASK0001OUTPUT	C50A51_C50A92	44	Single	65	Single	-0.146515	0.38687	2
BR130902TASK0001OUTPUT	C50A51_C50A92	44	Single	66	Single	0.346394	0.0357088	2
BR130902TASK0001OUTPUT	C50A51_C50A92	44	Single	7	Average	0.198508	0.238877	2
BR130902TASK0001OUTPUT	C50A51_C50A92	44	Single	8	Single	0.055899	0.742452	2
BR130902TASK0001OUTPUT	C50A51_C50A92	44	Single	81	Single	0.152352	0.368022	1
BR130902TASK0001OUTPUT	C50A51_C50A92	44	Single	9	Mixture	0.076469	0.652827	2
BR130902TASK0001OUTPUT	C50A51_C50A92	47	Average	48	Single	0.131982	0.436169	1
BR130902TASK0001OUTPUT	C50A51_C50A92	47	Average	50	Single	0.274165	0.100574	1
BR130902TASK0001OUTPUT	C50A51_C50A92	47	Average	51	Single	0.137214	0.418036	1
BR130902TASK0001OUTPUT	C50A51_C50A92	47	Average	52	Single	-0.003443	0.983866	1
BR130902TASK0001OUTPUT	C50A51_C50A92	47	Average	53	Single	0.237278	0.157346	1
BR130902TASK0001OUTPUT	C50A51_C50A92	47	Average	54	Single	0.192535	0.253591	1
BR130902TASK0001OUTPUT	C50A51_C50A92	47	Average	55	Single	0.077058	0.650322	1
BR130902TASK0001OUTPUT	C50A51_C50A92	47	Average	58	Single	0.012206	0.942838	1
BR130902TASK0001OUTPUT	C50A51_C50A92	47	Average	6	Single	-0.029496	0.862416	2
BR130902TASK0001OUTPUT	C50A51_C50A92	47	Average	65	Single	-0.035553	0.834522	2
BR130902TASK0001OUTPUT	C50A51_C50A92	47	Average	66	Single	0.186377	0.269382	2
BR130902TASK0001OUTPUT	C50A51_C50A92	47	Average	7	Average	-0.053752	0.752027	2
BR130902TASK0001OUTPUT	C50A51_C50A92	47	Average	8	Single	0.229634	0.171556	2
BR130902TASK0001OUTPUT	C50A51_C50A92	47	Average	81	Single	0.194221	0.249378	1
BR130902TASK0001OUTPUT	C50A51_C50A92	47	Average	9	Mixture	-0.251389	0.133388	2
BR130902TASK0001OUTPUT	C50A51_C50A92	48	Single	50	Single	0.238754	0.154703	1
BR130902TASK0001OUTPUT	C50A51_C50A92	48	Single	51	Single	0.087904	0.604912	1
BR130902TASK0001OUTPUT	C50A51_C50A92	48	Single	52	Single	0.262137	0.117036	1
BR130902TASK0001OUTPUT	C50A51_C50A92	48	Single	53	Single	0.098688	0.561165	1
BR130902TASK0001OUTPUT	C50A51_C50A92	48	Single	54	Single	0.192731	0.253098	1
BR130902TASK0001OUTPUT	C50A51_C50A92	48	Single	55	Single	0.161287	0.340256	1
BR130902TASK0001OUTPUT	C50A51_C50A92	48	Single	58	Single	0.295034	0.0762742	1
BR130902TASK0001OUTPUT	C50A51_C50A92	48	Single	6	Single	0.265809	0.111809	2
BR130902TASK0001OUTPUT	C50A51_C50A92	48	Single	65	Single	-0.121161	0.475019	2
BR130902TASK0001OUTPUT	C50A51_C50A92	48	Single	66	Single	0.044656	0.792981	2
BR130902TASK0001OUTPUT	C50A51_C50A92	48	Single	7	Average	-0.143826	0.395737	2
BR130902TASK0001OUTPUT	C50A51_C50A92	48	Single	8	Single	-0.057653	0.734658	2
BR130902TASK0001OUTPUT	C50A51_C50A92	48	Single	81	Single	0.181955	0.281108	1
BR130902TASK0001OUTPUT	C50A51_C50A92	48	Single	9	Mixture	-0.223037	0.184541	2
BR130902TASK0001OUTPUT	C50A51_C50A92	50	Single	51	Single	0.456247	0.00453697	1
BR130902TASK0001OUTPUT	C50A51_C50A92	50	Single	52	Single	0.080765	0.634652	1
BR130902TASK0001OUTPUT	C50A51_C50A92	50	Single	53	Single	0.214852	0.201597	1
BR130902TASK0001OUTPUT	C50A51_C50A92	50	Single	54	Single	0.041479	0.807422	1
BR130902TASK0001OUTPUT	C50A51_C50A92	50	Single	55	Single	0.278993	0.0944869	1
BR130902TASK0001OUTPUT	C50A51_C50A92	50	Single	58	Single	0.240441	0.151723	1
BR130902TASK0001OUTPUT	C50A51_C50A92	50	Single	6	Single	0.020122	0.905904	2
BR130902TASK0001OUTPUT	C50A51_C50A92	50	Single	65	Single	-0.267799	0.109051	2
BR130902TASK0001OUTPUT	C50A51_C50A92	50	Single	66	Single	0.293169	0.0782396	2
BR130902TASK0001OUTPUT	C50A51_C50A92	50	Single	7	Average	-0.394555	0.015668	2
BR130902TASK0001OUTPUT	C50A51_C50A92	50	Single	8	Single	0.12692	0.454122	2
BR130902TASK0001OUTPUT	C50A51_C50A92	50	Single	81	Single	0.140924	0.405438	1
BR130902TASK0001OUTPUT	C50A51_C50A92	50	Single	9	Mixture	-0.267654	0.10925	2
BR130902TASK0001OUTPUT	C50A51_C50A92	51	Single	52	Single	0.07014	0.679964	1
BR130902TASK0001OUTPUT	C50A51_C50A92	51	Single	53	Single	0.390819	0.0167727	1
BR130902TASK0001OUTPUT	C50A51_C50A92	51	Single	54	Single	0.128059	0.450047	1
BR130902TASK0001OUTPUT	C50A51_C50A92	51	Single	55	Single	0.196638	0.243419	1
BR130902TASK0001OUTPUT	C50A51_C50A92	51	Single	58	Single	0.257556	0.123811	1
BR130902TASK0001OUTPUT	C50A51_C50A92	51	Single	6	Single	0.030908	0.855898	2
BR130902TASK0001OUTPUT	C50A51_C50A92	51	Single	65	Single	-0.059726	0.72548	2
BR130902TASK0001OUTPUT	C50A51_C50A92	51	Single	66	Single	0.211881	0.208053	2
BR130902TASK0001OUTPUT	C50A51_C50A92	51	Single	7	Average	0.010812	0.949361	2
BR130902TASK0001OUTPUT	C50A51_C50A92	51	Single	8	Single	-0.106188	0.531629	2
BR130902TASK0001OUTPUT	C50A51_C50A92	51	Single	81	Single	0.108617	0.522231	1
BR130902TASK0001OUTPUT	C50A51_C50A92	51	Single	9	Mixture	-0.013357	0.937459	2
BR130902TASK0001OUTPUT	C50A51_C50A92	52	Single	53	Single	0.162111	0.337761	1
BR130902TASK0001OUTPUT	C50A51_C50A92	52	Single	54	Single	0.093808	0.580777	1
BR130902TASK0001OUTPUT	C50A51_C50A92	52	Single	55	Single	0.075916	0.655181	1
BR130902TASK0001OUTPUT	C50A51_C50A92	52	Single	58	Single	0.052462	0.757799	1
BR130902TASK0001OUTPUT	C50A51_C50A92	52	Single	6	Single	0.020277	0.905182	2
BR130902TASK0001OUTPUT	C50A51_C50A92	52	Single	65	Single	-0.178984	0.289174	2
BR130902TASK0001OUTPUT	C50A51_C50A92	52	Single	66	Single	-0.113134	0.504968	2
BR130902TASK0001OUTPUT	C50A51_C50A92	52	Single	7	Average	-0.041282	0.808322	2
BR130902TASK0001OUTPUT	C50A51_C50A92	52	Single	8	Single	-0.013407	0.937226	2
BR130902TASK0001OUTPUT	C50A51_C50A92	52	Single	81	Single	0.118333	0.485462	1
BR130902TASK0001OUTPUT	C50A51_C50A92	52	Single	9	Mixture	-0.176894	0.294932	2
BR130902TASK0001OUTPUT	C50A51_C50A92	53	Single	54	Single	0.234649	0.162133	1
BR130902TASK0001OUTPUT	C50A51_C50A92	53	Single	55	Single	0.069192	0.684066	1
BR130902TASK0001OUTPUT	C50A51_C50A92	53	Single	58	Single	0.481985	0.00252198	1
BR130902TASK0001OUTPUT	C50A51_C50A92	53	Single	6	Single	-0.232011	0.167042	2
BR130902TASK0001OUTPUT	C50A51_C50A92	53	Single	65	Single	-0.027361	0.872293	2
BR130902TASK0001OUTPUT	C50A51_C50A92	53	Single	66	Single	0.000143	0.999332	2
BR130902TASK0001OUTPUT	C50A51_C50A92	53	Single	7	Average	-0.030208	0.859129	2
BR130902TASK0001OUTPUT	C50A51_C50A92	53	Single	8	Single	-0.076246	0.653776	2
BR130902TASK0001OUTPUT	C50A51_C50A92	53	Single	81	Single	0.035133	0.836452	1
BR130902TASK0001OUTPUT	C50A51_C50A92	53	Single	9	Mixture	-0.028703	0.866081	2
BR130902TASK0001OUTPUT	C50A51_C50A92	54	Single	55	Single	0.06257	0.712951	1
BR130902TASK0001OUTPUT	C50A51_C50A92	54	Single	58	Single	0.114302	0.500554	1
BR130902TASK0001OUTPUT	C50A51_C50A92	54	Single	6	Single	0.014632	0.931503	2
BR130902TASK0001OUTPUT	C50A51_C50A92	54	Single	65	Single	-0.137012	0.418729	2
BR130902TASK0001OUTPUT	C50A51_C50A92	54	Single	66	Single	-0.066875	0.694125	2
BR130902TASK0001OUTPUT	C50A51_C50A92	54	Single	7	Average	0.17717	0.294167	2
BR130902TASK0001OUTPUT	C50A51_C50A92	54	Single	8	Single	0.053436	0.753441	2
BR130902TASK0001OUTPUT	C50A51_C50A92	54	Single	81	Single	0.352481	0.0323809	1
BR130902TASK0001OUTPUT	C50A51_C50A92	54	Single	9	Mixture	0.028357	0.867684	2
BR130902TASK0001OUTPUT	C50A51_C50A92	55	Single	58	Single	0.007201	0.966262	1
BR130902TASK0001OUTPUT	C50A51_C50A92	55	Single	6	Single	0.01428	0.93315	2
BR130902TASK0001OUTPUT	C50A51_C50A92	55	Single	65	Single	-0.161197	0.340527	2
BR130902TASK0001OUTPUT	C50A51_C50A92	55	Single	66	Single	0.356589	0.0302823	2
BR130902TASK0001OUTPUT	C50A51_C50A92	55	Single	7	Average	0.036066	0.832168	2
BR130902TASK0001OUTPUT	C50A51_C50A92	55	Single	8	Single	0.11131	0.511904	2
BR130902TASK0001OUTPUT	C50A51_C50A92	55	Single	81	Single	0.06803	0.689104	1
BR130902TASK0001OUTPUT	C50A51_C50A92	55	Single	9	Mixture	0.064503	0.704477	2
BR130902TASK0001OUTPUT	C50A51_C50A92	58	Single	6	Single	-0.323682	0.050669	2
BR130902TASK0001OUTPUT	C50A51_C50A92	58	Single	65	Single	0.356422	0.0303654	2
BR130902TASK0001OUTPUT	C50A51_C50A92	58	Single	66	Single	0.118422	0.485131	2
BR130902TASK0001OUTPUT	C50A51_C50A92	58	Single	7	Average	0.02949	0.862447	2
BR130902TASK0001OUTPUT	C50A51_C50A92	58	Single	8	Single	-0.212745	0.206161	2
BR130902TASK0001OUTPUT	C50A51_C50A92	58	Single	81	Single	0.142854	0.398969	1
BR130902TASK0001OUTPUT	C50A51_C50A92	58	Single	9	Mixture	-0.19911	0.237426	2
BR130902TASK0001OUTPUT	C50A51_C50A92	6	Single	65	Single	-0.139418	0.410526	1
BR130902TASK0001OUTPUT	C50A51_C50A92	6	Single	66	Single	-0.242718	0.147766	1
BR130902TASK0001OUTPUT	C50A51_C50A92	6	Single	7	Average	0.06399	0.706721	1
BR130902TASK0001OUTPUT	C50A51_C50A92	6	Single	8	Single	-0.172721	0.306654	1
BR130902TASK0001OUTPUT	C50A51_C50A92	6	Single	81	Single	0.02857	0.866696	2
BR130902TASK0001OUTPUT	C50A51_C50A92	6	Single	9	Mixture	-0.184607	0.274036	1
BR130902TASK0001OUTPUT	C50A51_C50A92	65	Single	66	Single	-0.239419	0.153523	1
BR130902TASK0001OUTPUT	C50A51_C50A92	65	Single	7	Average	0.235341	0.160864	1
BR130902TASK0001OUTPUT	C50A51_C50A92	65	Single	8	Single	-0.152771	0.36669	1
BR130902TASK0001OUTPUT	C50A51_C50A92	65	Single	81	Single	0.013004	0.939109	2
BR130902TASK0001OUTPUT	C50A51_C50A92	65	Single	9	Mixture	-0.109107	0.520342	1
BR130902TASK0001OUTPUT	C50A51_C50A92	66	Single	7	Average	0.053334	0.753894	1
BR130902TASK0001OUTPUT	C50A51_C50A92	66	Single	8	Single	0.212456	0.206793	1
BR130902TASK0001OUTPUT	C50A51_C50A92	66	Single	81	Single	0.017971	0.915922	2
BR130902TASK0001OUTPUT	C50A51_C50A92	66	Single	9	Mixture	0.224531	0.18154	1
BR130902TASK0001OUTPUT	C50A51_C50A92	7	Average	8	Single	0.100498	0.553966	1
BR130902TASK0001OUTPUT	C50A51_C50A92	7	Average	81	Single	0.039192	0.817856	2
BR130902TASK0001OUTPUT	C50A51_C50A92	7	Average	9	Mixture	0.088757	0.6014	1
BR130902TASK0001OUTPUT	C50A51_C50A92	8	Single	81	Single	0.086875	0.609162	2
BR130902TASK0001OUTPUT	C50A51_C50A92	8	Single	9	Mixture	0.049818	0.769664	1
BR130902TASK0001OUTPUT	C50A51_C50A92	81	Single	9	Mixture	-0.031263	0.85426	2
BR130902TASK0001OUTPUT	C50A91_C50A52	1	Single	10	Single	-0.090756	0.535144	1
BR130902TASK0001OUTPUT	C50A91_C50A52	1	Single	14	Single	0.162588	0.269542	1
BR130902TASK0001OUTPUT	C50A91_C50A52	1	Single	3	Single	0.068749	0.638799	1
BR130902TASK0001OUTPUT	C50A91_C50A52	1	Single	33	Single	-0.183559	0.206769	1
BR130902TASK0001OUTPUT	C50A91_C50A52	1	Single	34	Single	-0.072753	0.619343	1
BR130902TASK0001OUTPUT	C50A91_C50A52	1	Single	35	Single	0.01333	0.927569	1
BR130902TASK0001OUTPUT	C50A91_C50A52	1	Single	36	Single	-0.202904	0.162037	1
BR130902TASK0001OUTPUT	C50A91_C50A52	1	Single	37	Single	-0.098705	0.499836	1
BR130902TASK0001OUTPUT	C50A91_C50A52	1	Single	41	Outside	0.031489	0.829933	2
BR130902TASK0001OUTPUT	C50A91_C50A52	1	Single	43	Single	0.043351	0.767409	2
BR130902TASK0001OUTPUT	C50A91_C50A52	1	Single	44	Mixture	0.226068	0.122338	2
BR130902TASK0001OUTPUT	C50A91_C50A52	1	Single	46	Single	0.189127	0.193089	2
BR130902TASK0001OUTPUT	C50A91_C50A52	1	Single	47	Single	0.029564	0.841894	2
BR130902TASK0001OUTPUT	C50A91_C50A52	1	Single	48	Average	0.266837	0.0667478	2
BR130902TASK0001OUTPUT	C50A91_C50A52	1	Single	49	Single	0.079327	0.587951	2
BR130902TASK0001OUTPUT	C50A91_C50A52	1	Single	50	Single	-0.061396	0.675161	2
BR130902TASK0001OUTPUT	C50A91_C50A52	1	Single	51	Single	0.146095	0.316513	2
BR130902TASK0001OUTPUT	C50A91_C50A52	1	Single	52	Single	0.234901	0.10423	2
BR130902TASK0001OUTPUT	C50A91_C50A52	1	Single	53	Single	-0.007773	0.957726	2
BR130902TASK0001OUTPUT	C50A91_C50A52	1	Single	54	Single	0.129428	0.375433	2
BR130902TASK0001OUTPUT	C50A91_C50A52	1	Single	55	Single	-0.103907	0.477395	2
BR130902TASK0001OUTPUT	C50A91_C50A52	1	Single	58	Single	0.137397	0.346488	2
BR130902TASK0001OUTPUT	C50A91_C50A52	1	Single	6	Single	-0.127839	0.38137	1
BR130902TASK0001OUTPUT	C50A91_C50A52	1	Single	65	Single	-0.085816	0.561949	1
BR130902TASK0001OUTPUT	C50A91_C50A52	1	Single	66	Single	0.113579	0.437131	1
BR130902TASK0001OUTPUT	C50A91_C50A52	1	Single	7	Single	-0.163678	0.261111	1
BR130902TASK0001OUTPUT	C50A91_C50A52	1	Single	74	Single	0.017544	0.904761	1
BR130902TASK0001OUTPUT	C50A91_C50A52	1	Single	8	Single	0.00145	0.992112	1
BR130902TASK0001OUTPUT	C50A91_C50A52	1	Single	81	Single	0.353078	0.0128296	2
BR130902TASK0001OUTPUT	C50A91_C50A52	1	Single	9	Single	-0.197737	0.173224	1
BR130902TASK0001OUTPUT	C50A91_C50A52	10	Single	14	Single	0.286937	0.048002	1
BR130902TASK0001OUTPUT	C50A91_C50A52	10	Single	3	Single	0.106218	0.467597	1
BR130902TASK0001OUTPUT	C50A91_C50A52	10	Single	33	Single	0.182385	0.209736	1
BR130902TASK0001OUTPUT	C50A91_C50A52	10	Single	34	Single	-0.180938	0.213436	1
BR130902TASK0001OUTPUT	C50A91_C50A52	10	Single	35	Single	-0.128603	0.378511	1
BR130902TASK0001OUTPUT	C50A91_C50A52	10	Single	36	Single	0.001178	0.993589	1
BR130902TASK0001OUTPUT	C50A91_C50A52	10	Single	37	Single	-0.184123	0.205352	1
BR130902TASK0001OUTPUT	C50A91_C50A52	10	Single	41	Outside	0.038128	0.794784	2
BR130902TASK0001OUTPUT	C50A91_C50A52	10	Single	43	Single	-0.07184	0.623758	2
BR130902TASK0001OUTPUT	C50A91_C50A52	10	Single	44	Mixture	-0.171974	0.242485	2
BR130902TASK0001OUTPUT	C50A91_C50A52	10	Single	46	Single	-0.083976	0.566191	2
BR130902TASK0001OUTPUT	C50A91_C50A52	10	Single	47	Single	-0.377113	0.00823735	2
BR130902TASK0001OUTPUT	C50A91_C50A52	10	Single	48	Average	0.102122	0.489766	2
BR130902TASK0001OUTPUT	C50A91_C50A52	10	Single	49	Single	-0.199394	0.169577	2
BR130902TASK0001OUTPUT	C50A91_C50A52	10	Single	50	Single	0.092186	0.528702	2
BR130902TASK0001OUTPUT	C50A91_C50A52	10	Single	51	Single	-0.099526	0.49626	2
BR130902TASK0001OUTPUT	C50A91_C50A52	10	Single	52	Single	-0.368187	0.0092434	2
BR130902TASK0001OUTPUT	C50A91_C50A52	10	Single	53	Single	0.142517	0.328638	2
BR130902TASK0001OUTPUT	C50A91_C50A52	10	Single	54	Single	-0.132767	0.363132	2
BR130902TASK0001OUTPUT	C50A91_C50A52	10	Single	55	Single	0.127945	0.380975	2
BR130902TASK0001OUTPUT	C50A91_C50A52	10	Single	58	Single	0.133629	0.359996	2
BR130902TASK0001OUTPUT	C50A91_C50A52	10	Single	6	Single	-0.179093	0.218221	1
BR130902TASK0001OUTPUT	C50A91_C50A52	10	Single	65	Single	-0.013762	0.926032	1
BR130902TASK0001OUTPUT	C50A91_C50A52	10	Single	66	Single	0.010389	0.94352	1
BR130902TASK0001OUTPUT	C50A91_C50A52	10	Single	7	Single	0.10646	0.466578	1
BR130902TASK0001OUTPUT	C50A91_C50A52	10	Single	74	Single	0.100242	0.49315	1
BR130902TASK0001OUTPUT	C50A91_C50A52	10	Single	8	Single	0.078411	0.592281	1
BR130902TASK0001OUTPUT	C50A91_C50A52	10	Single	81	Single	-0.082706	0.572097	2
BR130902TASK0001OUTPUT	C50A91_C50A52	10	Single	9	Single	0.011934	0.935137	1
BR130902TASK0001OUTPUT	C50A91_C50A52	14	Single	3	Single	-0.127437	0.388048	1
BR130902TASK0001OUTPUT	C50A91_C50A52	14	Single	33	Single	0.07134	0.629915	1
BR130902TASK0001OUTPUT	C50A91_C50A52	14	Single	34	Single	-0.164304	0.264452	1
BR130902TASK0001OUTPUT	C50A91_C50A52	14	Single	35	Single	0.00277	0.98509	1
BR130902TASK0001OUTPUT	C50A91_C50A52	14	Single	36	Single	0.159484	0.278914	1
BR130902TASK0001OUTPUT	C50A91_C50A52	14	Single	37	Single	0.037524	0.800103	1
BR130902TASK0001OUTPUT	C50A91_C50A52	14	Single	41	Outside	0.009676	0.947956	2
BR130902TASK0001OUTPUT	C50A91_C50A52	14	Single	43	Single	-0.212886	0.146294	2
BR130902TASK0001OUTPUT	C50A91_C50A52	14	Single	44	Mixture	-0.146797	0.324801	2
BR130902TASK0001OUTPUT	C50A91_C50A52	14	Single	46	Single	-0.081607	0.581353	2
BR130902TASK0001OUTPUT	C50A91_C50A52	14	Single	47	Single	-0.222123	0.133457	2
BR130902TASK0001OUTPUT	C50A91_C50A52	14	Single	48	Average	0.135667	0.363216	2
BR130902TASK0001OUTPUT	C50A91_C50A52	14	Single	49	Single	0.027397	0.853354	2
BR130902TASK0001OUTPUT	C50A91_C50A52	14	Single	50	Single	0.068529	0.643497	2
BR130902TASK0001OUTPUT	C50A91_C50A52	14	Single	51	Single	0.28924	0.0461594	2
BR130902TASK0001OUTPUT	C50A91_C50A52	14	Single	52	Single	-0.031018	0.834229	2
BR130902TASK0001OUTPUT	C50A91_C50A52	14	Single	53	Single	0.233508	0.110195	2
BR130902TASK0001OUTPUT	C50A91_C50A52	14	Single	54	Single	-0.026695	0.857068	2
BR130902TASK0001OUTPUT	C50A91_C50A52	14	Single	55	Single	0.074825	0.613247	2
BR130902TASK0001OUTPUT	C50A91_C50A52	14	Single	58	Single	0.290271	0.0453527	2
BR130902TASK0001OUTPUT	C50A91_C50A52	14	Single	6	Single	0.070713	0.632936	1
BR130902TASK0001OUTPUT	C50A91_C50A52	14	Single	65	Single	0.033986	0.820588	1
BR130902TASK0001OUTPUT	C50A91_C50A52	14	Single	66	Single	-0.025747	0.862094	1
BR130902TASK0001OUTPUT	C50A91_C50A52	14	Single	7	Single	0.268428	0.0650785	1
BR130902TASK0001OUTPUT	C50A91_C50A52	14	Single	74	Single	0.232191	0.112274	1
BR130902TASK0001OUTPUT	C50A91_C50A52	14	Single	8	Single	0.035912	0.808526	1
BR130902TASK0001OUTPUT	C50A91_C50A52	14	Single	81	Single	-0.024765	0.867309	2
BR130902TASK0001OUTPUT	C50A91_C50A52	14	Single	9	Single	0.132293	0.370069	1
BR130902TASK0001OUTPUT	C50A91_C50A52	3	Single	33	Single	-0.049293	0.73661	1
BR130902TASK0001OUTPUT	C50A91_C50A52	3	Single	34	Single	-0.14231	0.329346	1
BR130902TASK0001OUTPUT	C50A91_C50A52	3	Single	35	Single	-0.242991	0.0925017	1
BR130902TASK0001OUTPUT	C50A91_C50A52	3	Single	36	Single	0.012708	0.930937	1
BR130902TASK0001OUTPUT	C50A91_C50A52	3	Single	37	Single	-0.147401	0.312159	1
BR130902TASK0001OUTPUT	C50A91_C50A52	3	Single	41	Outside	0.057164	0.696434	2
BR130902TASK0001OUTPUT	C50A91_C50A52	3	Single	43	Single	-0.02704	0.853678	2
BR130902TASK0001OUTPUT	C50A91_C50A52	3	Single	44	Mixture	-0.277459	0.0562241	2
BR130902TASK0001OUTPUT	C50A91_C50A52	3	Single	46	Single	0.362075	0.0105734	2
BR130902TASK0001OUTPUT	C50A91_C50A52	3	Single	47	Single	0.000565	0.996958	2
BR130902TASK0001OUTPUT	C50A91_C50A52	3	Single	48	Average	-0.105422	0.475771	2
BR130902TASK0001OUTPUT	C50A91_C50A52	3	Single	49	Single	0.131519	0.367702	2
BR130902TASK0001OUTPUT	C50A91_C50A52	3	Single	50	Single	0.245138	0.0895684	2
BR130902TASK0001OUTPUT	C50A91_C50A52	3	Single	51	Single	-0.005101	0.972253	2
BR130902TASK0001OUTPUT	C50A91_C50A52	3	Single	52	Single	0.135095	0.354702	2
BR130902TASK0001OUTPUT	C50A91_C50A52	3	Single	53	Single	0.155586	0.285743	2
BR130902TASK0001OUTPUT	C50A91_C50A52	3	Single	54	Single	0.049319	0.736472	2
BR130902TASK0001OUTPUT	C50A91_C50A52	3	Single	55	Single	0.073858	0.614017	2
BR130902TASK0001OUTPUT	C50A91_C50A52	3	Single	58	Single	0.155739	0.285264	2
BR130902TASK0001OUTPUT	C50A91_C50A52	3	Single	6	Single	0.00175	0.990477	1
BR130902TASK0001OUTPUT	C50A91_C50A52	3	Single	65	Single	-0.088137	0.551377	1
BR130902TASK0001OUTPUT	C50A91_C50A52	3	Single	66	Single	0.109238	0.454965	1
BR130902TASK0001OUTPUT	C50A91_C50A52	3	Single	7	Single	0.090633	0.535701	1
BR130902TASK0001OUTPUT	C50A91_C50A52	3	Single	74	Single	0.27248	0.0582076	1
BR130902TASK0001OUTPUT	C50A91_C50A52	3	Single	8	Single	0.195009	0.17935	1
BR130902TASK0001OUTPUT	C50A91_C50A52	3	Single	81	Single	0.170266	0.242138	2
BR130902TASK0001OUTPUT	C50A91_C50A52	3	Single	9	Single	0.120776	0.408442	1
BR130902TASK0001OUTPUT	C50A91_C50A52	33	Single	34	Single	0.178229	0.220487	1
BR130902TASK0001OUTPUT	C50A91_C50A52	33	Single	35	Single	0.510002	0.000181611	1
BR130902TASK0001OUTPUT	C50A91_C50A52	33	Single	36	Single	0.29534	0.0393782	1
BR130902TASK0001OUTPUT	C50A91_C50A52	33	Single	37	Single	0.524358	0.000110068	1
BR130902TASK0001OUTPUT	C50A91_C50A52	33	Single	41	Outside	-0.342674	0.0159407	2
BR130902TASK0001OUTPUT	C50A91_C50A52	33	Single	43	Single	-0.183237	0.20758	2
BR130902TASK0001OUTPUT	C50A91_C50A52	33	Single	44	Mixture	-0.314992	0.0292096	2
BR130902TASK0001OUTPUT	C50A91_C50A52	33	Single	46	Single	0.184168	0.205239	2
BR130902TASK0001OUTPUT	C50A91_C50A52	33	Single	47	Single	-0.295955	0.0411129	2
BR130902TASK0001OUTPUT	C50A91_C50A52	33	Single	48	Average	0.033859	0.819286	2
BR130902TASK0001OUTPUT	C50A91_C50A52	33	Single	49	Single	0.213287	0.141168	2
BR130902TASK0001OUTPUT	C50A91_C50A52	33	Single	50	Single	0.129667	0.374546	2
BR130902TASK0001OUTPUT	C50A91_C50A52	33	Single	51	Single	0.025584	0.861479	2
BR130902TASK0001OUTPUT	C50A91_C50A52	33	Single	52	Single	-0.115143	0.430803	2
BR130902TASK0001OUTPUT	C50A91_C50A52	33	Single	53	Single	-0.157768	0.278959	2
BR130902TASK0001OUTPUT	C50A91_C50A52	33	Single	54	Single	-0.168692	0.246585	2
BR130902TASK0001OUTPUT	C50A91_C50A52	33	Single	55	Single	-0.004479	0.975634	2
BR130902TASK0001OUTPUT	C50A91_C50A52	33	Single	58	Single	-0.094495	0.518384	2
BR130902TASK0001OUTPUT	C50A91_C50A52	33	Single	6	Single	-0.083999	0.566084	1
BR130902TASK0001OUTPUT	C50A91_C50A52	33	Single	65	Single	0.17666	0.229694	1
BR130902TASK0001OUTPUT	C50A91_C50A52	33	Single	66	Single	0.110223	0.450882	1
BR130902TASK0001OUTPUT	C50A91_C50A52	33	Single	7	Single	0.097799	0.503797	1
BR130902TASK0001OUTPUT	C50A91_C50A52	33	Single	74	Single	0.112863	0.440045	1
BR130902TASK0001OUTPUT	C50A91_C50A52	33	Single	8	Single	-0.126826	0.385189	1
BR130902TASK0001OUTPUT	C50A91_C50A52	33	Single	81	Single	-0.219492	0.129691	2
BR130902TASK0001OUTPUT	C50A91_C50A52	33	Single	9	Single	0.186061	0.200539	1
BR130902TASK0001OUTPUT	C50A91_C50A52	34	Single	35	Single	0.267591	0.0630498	1
BR130902TASK0001OUTPUT	C50A91_C50A52	34	Single	36	Single	0.120118	0.411019	1
BR130902TASK0001OUTPUT	C50A91_C50A52	34	Single	37	Single	0.178408	0.220016	1
BR130902TASK0001OUTPUT	C50A91_C50A52	34	Single	41	Outside	-0.007264	0.96049	2
BR130902TASK0001OUTPUT	C50A91_C50A52	34	Single	43	Single	0.190762	0.189197	2
BR130902TASK0001OUTPUT	C50A91_C50A52	34	Single	44	Mixture	0.057919	0.695776	2
BR130902TASK0001OUTPUT	C50A91_C50A52	34	Single	46	Single	0.146198	0.316167	2
BR130902TASK0001OUTPUT	C50A91_C50A52	34	Single	47	Single	0.168386	0.252602	2
BR130902TASK0001OUTPUT	C50A91_C50A52	34	Single	48	Average	0.016871	0.909389	2
BR130902TASK0001OUTPUT	C50A91_C50A52	34	Single	49	Single	0.084367	0.564378	2
BR130902TASK0001OUTPUT	C50A91_C50A52	34	Single	50	Single	0.266309	0.0643715	2
BR130902TASK0001OUTPUT	C50A91_C50A52	34	Single	51	Single	0.002082	0.988674	2
BR130902TASK0001OUTPUT	C50A91_C50A52	34	Single	52	Single	0.077604	0.596111	2
BR130902TASK0001OUTPUT	C50A91_C50A52	34	Single	53	Single	-0.311104	0.0295685	2
BR130902TASK0001OUTPUT	C50A91_C50A52	34	Single	54	Single	0.031365	0.830593	2
BR130902TASK0001OUTPUT	C50A91_C50A52	34	Single	55	Single	0.000921	0.994989	2
BR130902TASK0001OUTPUT	C50A91_C50A52	34	Single	58	Single	0.023051	0.875079	2
BR130902TASK0001OUTPUT	C50A91_C50A52	34	Single	6	Single	0.182038	0.210619	1
BR130902TASK0001OUTPUT	C50A91_C50A52	34	Single	65	Single	0.133835	0.364469	1
BR130902TASK0001OUTPUT	C50A91_C50A52	34	Single	66	Single	0.087271	0.550997	1
BR130902TASK0001OUTPUT	C50A91_C50A52	34	Single	7	Single	-0.113235	0.438531	1
BR130902TASK0001OUTPUT	C50A91_C50A52	34	Single	74	Single	-0.011674	0.936548	1
BR130902TASK0001OUTPUT	C50A91_C50A52	34	Single	8	Single	-0.01202	0.93467	1
BR130902TASK0001OUTPUT	C50A91_C50A52	34	Single	81	Single	0.147524	0.311749	2
BR130902TASK0001OUTPUT	C50A91_C50A52	34	Single	9	Single	0.111515	0.445562	1
BR130902TASK0001OUTPUT	C50A91_C50A52	35	Single	36	Single	0.514967	0.000153116	1
BR130902TASK0001OUTPUT	C50A91_C50A52	35	Single	37	Single	0.58795	8.90778e-06	1
BR130902TASK0001OUTPUT	C50A91_C50A52	35	Single	41	Outside	-0.547296	4.71201e-05	2
BR130902TASK0001OUTPUT	C50A91_C50A52	35	Single	43	Single	-0.160396	0.270926	2
BR130902TASK0001OUTPUT	C50A91_C50A52	35	Single	44	Mixture	-0.232308	0.112088	2
BR130902TASK0001OUTPUT	C50A91_C50A52	35	Single	46	Single	-0.009659	0.947483	2
BR130902TASK0001OUTPUT	C50A91_C50A52	35	Single	47	Single	-0.015445	0.917018	2
BR130902TASK0001OUTPUT	C50A91_C50A52	35	Single	48	Average	-0.100021	0.498787	2
BR130902TASK0001OUTPUT	C50A91_C50A52	35	Single	49	Single	0.086941	0.552511	2
BR130902TASK0001OUTPUT	C50A91_C50A52	35	Single	50	Single	0.163333	0.262132	2
BR130902TASK0001OUTPUT	C50A91_C50A52	35	Single	51	Single	-0.052388	0.72072	2
BR130902TASK0001OUTPUT	C50A91_C50A52	35	Single	52	Single	-0.005668	0.969169	2
BR130902TASK0001OUTPUT	C50A91_C50A52	35	Single	53	Single	-0.168696	0.246573	2
BR130902TASK0001OUTPUT	C50A91_C50A52	35	Single	54	Single	-0.21537	0.137233	2
BR130902TASK0001OUTPUT	C50A91_C50A52	35	Single	55	Single	-0.152658	0.295021	2
BR130902TASK0001OUTPUT	C50A91_C50A52	35	Single	58	Single	0.035696	0.807618	2
BR130902TASK0001OUTPUT	C50A91_C50A52	35	Single	6	Single	-0.061662	0.673832	1
BR130902TASK0001OUTPUT	C50A91_C50A52	35	Single	65	Single	-0.022122	0.881362	1
BR130902TASK0001OUTPUT	C50A91_C50A52	35	Single	66	Single	-0.192379	0.185403	1
BR130902TASK0001OUTPUT	C50A91_C50A52	35	Single	7	Single	0.247126	0.0869169	1
BR130902TASK0001OUTPUT	C50A91_C50A52	35	Single	74	Single	-0.014283	0.922404	1
BR130902TASK0001OUTPUT	C50A91_C50A52	35	Single	8	Single	-0.231725	0.109136	1
BR130902TASK0001OUTPUT	C50A91_C50A52	35	Single	81	Single	-0.272991	0.057719	2
BR130902TASK0001OUTPUT	C50A91_C50A52	35	Single	9	Single	-0.054991	0.707447	1
BR130902TASK0001OUTPUT	C50A91_C50A52	36	Single	37	Single	0.406467	0.00375453	1
BR130902TASK0001OUTPUT	C50A91_C50A52	36	Single	41	Outside	-0.324556	0.022893	2
BR130902TASK0001OUTPUT	C50A91_C50A52	36	Single	43	Single	-0.204197	0.159321	2
BR130902TASK0001OUTPUT	C50A91_C50A52	36	Single	44	Mixture	-0.428541	0.0023748	2
BR130902TASK0001OUTPUT	C50A91_C50A52	36	Single	46	Single	0.089084	0.54272	2
BR130902TASK0001OUTPUT	C50A91_C50A52	36	Single	47	Single	-0.066967	0.651097	2
BR130902TASK0001OUTPUT	C50A91_C50A52	36	Single	48	Average	-0.271173	0.0622765	2
BR130902TASK0001OUTPUT	C50A91_C50A52	36	Single	49	Single	0.030121	0.837219	2
BR130902TASK0001OUTPUT	C50A91_C50A52	36	Single	50	Single	-0.002066	0.988757	2
BR130902TASK0001OUTPUT	C50A91_C50A52	36	Single	51	Single	-0.052915	0.718026	2
BR130902TASK0001OUTPUT	C50A91_C50A52	36	Single	52	Single	-0.252692	0.0798195	2
BR130902TASK0001OUTPUT	C50A91_C50A52	36	Single	53	Single	-0.1296	0.374794	2
BR130902TASK0001OUTPUT	C50A91_C50A52	36	Single	54	Single	-0.141533	0.332021	2
BR130902TASK0001OUTPUT	C50A91_C50A52	36	Single	55	Single	-0.37644	0.0076782	2
BR130902TASK0001OUTPUT	C50A91_C50A52	36	Single	58	Single	0.06088	0.677746	2
BR130902TASK0001OUTPUT	C50A91_C50A52	36	Single	6	Single	0.137659	0.34556	1
BR130902TASK0001OUTPUT	C50A91_C50A52	36	Single	65	Single	-0.004743	0.974476	1
BR130902TASK0001OUTPUT	C50A91_C50A52	36	Single	66	Single	-0.250879	0.0820796	1
BR130902TASK0001OUTPUT	C50A91_C50A52	36	Single	7	Single	0.312361	0.0288831	1
BR130902TASK0001OUTPUT	C50A91_C50A52	36	Single	74	Single	0.012188	0.933758	1
BR130902TASK0001OUTPUT	C50A91_C50A52	36	Single	8	Single	-0.066316	0.650744	1
BR130902TASK0001OUTPUT	C50A91_C50A52	36	Single	81	Single	-0.372978	0.00830439	2
BR130902TASK0001OUTPUT	C50A91_C50A52	36	Single	9	Single	-0.019902	0.892035	1
BR130902TASK0001OUTPUT	C50A91_C50A52	37	Single	41	Outside	-0.410336	0.00340747	2
BR130902TASK0001OUTPUT	C50A91_C50A52	37	Single	43	Single	-0.320079	0.0249574	2
BR130902TASK0001OUTPUT	C50A91_C50A52	37	Single	44	Mixture	-0.147598	0.316765	2
BR130902TASK0001OUTPUT	C50A91_C50A52	37	Single	46	Single	-0.106737	0.465413	2
BR130902TASK0001OUTPUT	C50A91_C50A52	37	Single	47	Single	-0.031963	0.829251	2
BR130902TASK0001OUTPUT	C50A91_C50A52	37	Single	48	Average	-0.045039	0.761154	2
BR130902TASK0001OUTPUT	C50A91_C50A52	37	Single	49	Single	0.300844	0.0356871	2
BR130902TASK0001OUTPUT	C50A91_C50A52	37	Single	50	Single	-0.000236	0.998715	2
BR130902TASK0001OUTPUT	C50A91_C50A52	37	Single	51	Single	-0.060585	0.679219	2
BR130902TASK0001OUTPUT	C50A91_C50A52	37	Single	52	Single	-0.109584	0.453529	2
BR130902TASK0001OUTPUT	C50A91_C50A52	37	Single	53	Single	-0.2039	0.159942	2
BR130902TASK0001OUTPUT	C50A91_C50A52	37	Single	54	Single	-0.182559	0.209296	2
BR130902TASK0001OUTPUT	C50A91_C50A52	37	Single	55	Single	-0.436796	0.00170168	2
BR130902TASK0001OUTPUT	C50A91_C50A52	37	Single	58	Single	-0.064286	0.66078	2
BR130902TASK0001OUTPUT	C50A91_C50A52	37	Single	6	Single	0.096955	0.507506	1
BR130902TASK0001OUTPUT	C50A91_C50A52	37	Single	65	Single	0.02852	0.847411	1
BR130902TASK0001OUTPUT	C50A91_C50A52	37	Single	66	Single	-0.122654	0.401138	1
BR130902TASK0001OUTPUT	C50A91_C50A52	37	Single	7	Single	0.052269	0.721328	1
BR130902TASK0001OUTPUT	C50A91_C50A52	37	Single	74	Single	-0.082428	0.573395	1
BR130902TASK0001OUTPUT	C50A91_C50A52	37	Single	8	Single	-0.237362	0.100547	1
BR130902TASK0001OUTPUT	C50A91_C50A52	37	Single	81	Single	-0.188125	0.195502	2
BR130902TASK0001OUTPUT	C50A91_C50A52	37	Single	9	Single	-0.102569	0.483114	1
BR130902TASK0001OUTPUT	C50A91_C50A52	41	Outside	43	Single	0.281081	0.0504159	1
BR130902TASK0001OUTPUT	C50A91_C50A52	41	Outside	44	Mixture	0.311222	0.0313058	1
BR130902TASK0001OUTPUT	C50A91_C50A52	41	Outside	46	Single	0.27834	0.0528017	1
BR130902TASK0001OUTPUT	C50A91_C50A52	41	Outside	47	Single	0.127602	0.38743	1
BR130902TASK0001OUTPUT	C50A91_C50A52	41	Outside	48	Average	0.045007	0.761315	1
BR130902TASK0001OUTPUT	C50A91_C50A52	41	Outside	49	Single	-0.130902	0.369973	1
BR130902TASK0001OUTPUT	C50A91_C50A52	41	Outside	50	Single	0.006286	0.965806	1
BR130902TASK0001OUTPUT	C50A91_C50A52	41	Outside	51	Single	0.182865	0.208519	1
BR130902TASK0001OUTPUT	C50A91_C50A52	41	Outside	52	Single	0.074272	0.612026	1
BR130902TASK0001OUTPUT	C50A91_C50A52	41	Outside	53	Single	-0.003946	0.978533	1
BR130902TASK0001OUTPUT	C50A91_C50A52	41	Outside	54	Single	0.234384	0.105017	1
BR130902TASK0001OUTPUT	C50A91_C50A52	41	Outside	55	Single	0.168935	0.245894	1
BR130902TASK0001OUTPUT	C50A91_C50A52	41	Outside	58	Single	-0.110813	0.448448	1
BR130902TASK0001OUTPUT	C50A91_C50A52	41	Outside	6	Single	-0.063868	0.662851	2
BR130902TASK0001OUTPUT	C50A91_C50A52	41	Outside	65	Single	0.103339	0.48458	2
BR130902TASK0001OUTPUT	C50A91_C50A52	41	Outside	66	Single	0.084779	0.562469	2
BR130902TASK0001OUTPUT	C50A91_C50A52	41	Outside	7	Single	-0.168444	0.247288	2
BR130902TASK0001OUTPUT	C50A91_C50A52	41	Outside	74	Single	-0.108472	0.458152	2
BR130902TASK0001OUTPUT	C50A91_C50A52	41	Outside	8	Single	-0.064916	0.657658	2
BR130902TASK0001OUTPUT	C50A91_C50A52	41	Outside	81	Single	0.295998	0.0389204	1
BR130902TASK0001OUTPUT	C50A91_C50A52	41	Outside	9	Single	0.091626	0.531219	2
BR130902TASK0001OUTPUT	C50A91_C50A52	43	Single	44	Mixture	0.348193	0.0153005	1
BR130902TASK0001OUTPUT	C50A91_C50A52	43	Single	46	Single	0.180004	0.215851	1
BR130902TASK0001OUTPUT	C50A91_C50A52	43	Single	47	Single	0.379911	0.00773571	1
BR130902TASK0001OUTPUT	C50A91_C50A52	43	Single	48	Average	-0.209538	0.152896	1
BR130902TASK0001OUTPUT	C50A91_C50A52	43	Single	49	Single	-0.109217	0.455051	1
BR130902TASK0001OUTPUT	C50A91_C50A52	43	Single	50	Single	0.084439	0.564042	1
BR130902TASK0001OUTPUT	C50A91_C50A52	43	Single	51	Single	0.024883	0.865239	1
BR130902TASK0001OUTPUT	C50A91_C50A52	43	Single	52	Single	0.038947	0.790477	1
BR130902TASK0001OUTPUT	C50A91_C50A52	43	Single	53	Single	-0.145288	0.31922	1
BR130902TASK0001OUTPUT	C50A91_C50A52	43	Single	54	Single	0.103704	0.478262	1
BR130902TASK0001OUTPUT	C50A91_C50A52	43	Single	55	Single	0.025693	0.860893	1
BR130902TASK0001OUTPUT	C50A91_C50A52	43	Single	58	Single	-0.203483	0.160817	1
BR130902TASK0001OUTPUT	C50A91_C50A52	43	Single	6	Single	-0.243469	0.0918422	2
BR130902TASK0001OUTPUT	C50A91_C50A52	43	Single	65	Single	0.389209	0.00625388	2
BR130902TASK0001OUTPUT	C50A91_C50A52	43	Single	66	Single	0.159302	0.274249	2
BR130902TASK0001OUTPUT	C50A91_C50A52	43	Single	7	Single	-0.296681	0.038451	2
BR130902TASK0001OUTPUT	C50A91_C50A52	43	Single	74	Single	-0.255575	0.0763276	2
BR130902TASK0001OUTPUT	C50A91_C50A52	43	Single	8	Single	0.112684	0.440777	2
BR130902TASK0001OUTPUT	C50A91_C50A52	43	Single	81	Single	0.230826	0.110556	1
BR130902TASK0001OUTPUT	C50A91_C50A52	43	Single	9	Single	0.129005	0.377008	2
BR130902TASK0001OUTPUT	C50A91_C50A52	44	Mixture	46	Single	0.038675	0.794108	1
BR130902TASK0001OUTPUT	C50A91_C50A52	44	Mixture	47	Single	0.382592	0.00728006	1
BR130902TASK0001OUTPUT	C50A91_C50A52	44	Mixture	48	Average	0.041397	0.782335	1
BR130902TASK0001OUTPUT	C50A91_C50A52	44	Mixture	49	Single	-0.304918	0.0350901	1
BR130902TASK0001OUTPUT	C50A91_C50A52	44	Mixture	50	Single	-0.149966	0.308975	1
BR130902TASK0001OUTPUT	C50A91_C50A52	44	Mixture	51	Single	-0.102946	0.486253	1
BR130902TASK0001OUTPUT	C50A91_C50A52	44	Mixture	52	Single	0.047158	0.750269	1
BR130902TASK0001OUTPUT	C50A91_C50A52	44	Mixture	53	Single	-0.013685	0.926446	1
BR130902TASK0001OUTPUT	C50A91_C50A52	44	Mixture	54	Single	0.123278	0.403844	1
BR130902TASK0001OUTPUT	C50A91_C50A52	44	Mixture	55	Single	-0.139356	0.344835	1
BR130902TASK0001OUTPUT	C50A91_C50A52	44	Mixture	58	Single	-0.072796	0.62293	1
BR130902TASK0001OUTPUT	C50A91_C50A52	44	Mixture	6	Single	-0.224139	0.125645	2
BR130902TASK0001OUTPUT	C50A91_C50A52	44	Mixture	65	Single	0.192128	0.19574	2
BR130902TASK0001OUTPUT	C50A91_C50A52	44	Mixture	66	Single	0.091563	0.535952	2
BR130902TASK0001OUTPUT	C50A91_C50A52	44	Mixture	7	Single	-0.349333	0.0149467	2
BR130902TASK0001OUTPUT	C50A91_C50A52	44	Mixture	74	Single	-0.326191	0.0236588	2
BR130902TASK0001OUTPUT	C50A91_C50A52	44	Mixture	8	Single	-0.022194	0.880977	2
BR130902TASK0001OUTPUT	C50A91_C50A52	44	Mixture	81	Single	0.247209	0.0902704	1
BR130902TASK0001OUTPUT	C50A91_C50A52	44	Mixture	9	Single	-0.18286	0.213493	2
BR130902TASK0001OUTPUT	C50A91_C50A52	46	Single	47	Single	0.111125	0.452089	1
BR130902TASK0001OUTPUT	C50A91_C50A52	46	Single	48	Average	-0.032997	0.823811	1
BR130902TASK0001OUTPUT	C50A91_C50A52	46	Single	49	Single	0.012617	0.931431	1
BR130902TASK0001OUTPUT	C50A91_C50A52	46	Single	50	Single	0.149627	0.304824	1
BR130902TASK0001OUTPUT	C50A91_C50A52	46	Single	51	Single	-0.107814	0.460898	1
BR130902TASK0001OUTPUT	C50A91_C50A52	46	Single	52	Single	0.199871	0.168538	1
BR130902TASK0001OUTPUT	C50A91_C50A52	46	Single	53	Single	0.022694	0.876995	1
BR130902TASK0001OUTPUT	C50A91_C50A52	46	Single	54	Single	0.262063	0.0689083	1
BR130902TASK0001OUTPUT	C50A91_C50A52	46	Single	55	Single	0.048586	0.740255	1
BR130902TASK0001OUTPUT	C50A91_C50A52	46	Single	58	Single	0.080106	0.584277	1
BR130902TASK0001OUTPUT	C50A91_C50A52	46	Single	6	Single	-0.047684	0.744913	2
BR130902TASK0001OUTPUT	C50A91_C50A52	46	Single	65	Single	0.127245	0.388769	2
BR130902TASK0001OUTPUT	C50A91_C50A52	46	Single	66	Single	0.179773	0.21645	2
BR130902TASK0001OUTPUT	C50A91_C50A52	46	Single	7	Single	-0.108731	0.457073	2
BR130902TASK0001OUTPUT	C50A91_C50A52	46	Single	74	Single	-0.002424	0.98681	2
BR130902TASK0001OUTPUT	C50A91_C50A52	46	Single	8	Single	-0.116571	0.425071	2
BR130902TASK0001OUTPUT	C50A91_C50A52	46	Single	81	Single	0.328557	0.0211707	1
BR130902TASK0001OUTPUT	C50A91_C50A52	46	Single	9	Single	0.348992	0.0139832	2
BR130902TASK0001OUTPUT	C50A91_C50A52	47	Single	48	Average	0.005242	0.972106	1
BR130902TASK0001OUTPUT	C50A91_C50A52	47	Single	49	Single	0.080688	0.585632	1
BR130902TASK0001OUTPUT	C50A91_C50A52	47	Single	50	Single	0.052148	0.72483	1
BR130902TASK0001OUTPUT	C50A91_C50A52	47	Single	51	Single	0.225254	0.123725	1
BR130902TASK0001OUTPUT	C50A91_C50A52	47	Single	52	Single	0.164578	0.263646	1
BR130902TASK0001OUTPUT	C50A91_C50A52	47	Single	53	Single	0.020298	0.891082	1
BR130902TASK0001OUTPUT	C50A91_C50A52	47	Single	54	Single	0.121492	0.410744	1
BR130902TASK0001OUTPUT	C50A91_C50A52	47	Single	55	Single	-0.242581	0.0966603	1
BR130902TASK0001OUTPUT	C50A91_C50A52	47	Single	58	Single	0.121249	0.411686	1
BR130902TASK0001OUTPUT	C50A91_C50A52	47	Single	6	Single	-0.169352	0.249852	2
BR130902TASK0001OUTPUT	C50A91_C50A52	47	Single	65	Single	0.080822	0.589163	2
BR130902TASK0001OUTPUT	C50A91_C50A52	47	Single	66	Single	0.212956	0.146156	2
BR130902TASK0001OUTPUT	C50A91_C50A52	47	Single	7	Single	-0.079692	0.590284	2
BR130902TASK0001OUTPUT	C50A91_C50A52	47	Single	74	Single	-0.275237	0.0583071	2
BR130902TASK0001OUTPUT	C50A91_C50A52	47	Single	8	Single	-0.052884	0.721104	2
BR130902TASK0001OUTPUT	C50A91_C50A52	47	Single	81	Single	0.029641	0.841487	1
BR130902TASK0001OUTPUT	C50A91_C50A52	47	Single	9	Single	-0.013058	0.929806	2
BR130902TASK0001OUTPUT	C50A91_C50A52	48	Average	49	Single	0.312426	0.0306236	1
BR130902TASK0001OUTPUT	C50A91_C50A52	48	Average	50	Single	0.159472	0.278953	1
BR130902TASK0001OUTPUT	C50A91_C50A52	48	Average	51	Single	0.131245	0.373909	1
BR130902TASK0001OUTPUT	C50A91_C50A52	48	Average	52	Single	0.174935	0.234348	1
BR130902TASK0001OUTPUT	C50A91_C50A52	48	Average	53	Single	-0.051594	0.727645	1
BR130902TASK0001OUTPUT	C50A91_C50A52	48	Average	54	Single	0.132419	0.369611	1
BR130902TASK0001OUTPUT	C50A91_C50A52	48	Average	55	Single	0.12126	0.411642	1
BR130902TASK0001OUTPUT	C50A91_C50A52	48	Average	58	Single	0.164263	0.264574	1
BR130902TASK0001OUTPUT	C50A91_C50A52	48	Average	6	Single	-0.001262	0.993208	2
BR130902TASK0001OUTPUT	C50A91_C50A52	48	Average	65	Single	-0.13164	0.377763	2
BR130902TASK0001OUTPUT	C50A91_C50A52	48	Average	66	Single	0.302748	0.0364767	2
BR130902TASK0001OUTPUT	C50A91_C50A52	48	Average	7	Single	-0.048684	0.742458	2
BR130902TASK0001OUTPUT	C50A91_C50A52	48	Average	74	Single	0.184786	0.208627	2
BR130902TASK0001OUTPUT	C50A91_C50A52	48	Average	8	Single	0.001837	0.990112	2
BR130902TASK0001OUTPUT	C50A91_C50A52	48	Average	81	Single	0.149602	0.310163	1
BR130902TASK0001OUTPUT	C50A91_C50A52	48	Average	9	Single	-0.022083	0.881568	2
BR130902TASK0001OUTPUT	C50A91_C50A52	49	Single	50	Single	0.137036	0.347769	1
BR130902TASK0001OUTPUT	C50A91_C50A52	49	Single	51	Single	0.292537	0.041375	1
BR130902TASK0001OUTPUT	C50A91_C50A52	49	Single	52	Single	0.231939	0.1088	1
BR130902TASK0001OUTPUT	C50A91_C50A52	49	Single	53	Single	0.008772	0.952299	1
BR130902TASK0001OUTPUT	C50A91_C50A52	49	Single	54	Single	0.140188	0.336683	1
BR130902TASK0001OUTPUT	C50A91_C50A52	49	Single	55	Single	-0.003122	0.983013	1
BR130902TASK0001OUTPUT	C50A91_C50A52	49	Single	58	Single	0.316585	0.0266753	1
BR130902TASK0001OUTPUT	C50A91_C50A52	49	Single	6	Single	0.110022	0.451715	2
BR130902TASK0001OUTPUT	C50A91_C50A52	49	Single	65	Single	0.043344	0.76989	2
BR130902TASK0001OUTPUT	C50A91_C50A52	49	Single	66	Single	0.384829	0.00632798	2
BR130902TASK0001OUTPUT	C50A91_C50A52	49	Single	7	Single	0.042881	0.769866	2
BR130902TASK0001OUTPUT	C50A91_C50A52	49	Single	74	Single	0.309265	0.0305962	2
BR130902TASK0001OUTPUT	C50A91_C50A52	49	Single	8	Single	0.027271	0.85244	2
BR130902TASK0001OUTPUT	C50A91_C50A52	49	Single	81	Single	0.125588	0.38988	1
BR130902TASK0001OUTPUT	C50A91_C50A52	49	Single	9	Single	-0.083816	0.566931	2
BR130902TASK0001OUTPUT	C50A91_C50A52	50	Single	51	Single	0.174066	0.231632	1
BR130902TASK0001OUTPUT	C50A91_C50A52	50	Single	52	Single	0.35134	0.0133098	1
BR130902TASK0001OUTPUT	C50A91_C50A52	50	Single	53	Single	-0.140594	0.335271	1
BR130902TASK0001OUTPUT	C50A91_C50A52	50	Single	54	Single	0.042933	0.769593	1
BR130902TASK0001OUTPUT	C50A91_C50A52	50	Single	55	Single	0.396457	0.00480035	1
BR130902TASK0001OUTPUT	C50A91_C50A52	50	Single	58	Single	0.133546	0.3603	1
BR130902TASK0001OUTPUT	C50A91_C50A52	50	Single	6	Single	0.079248	0.588323	2
BR130902TASK0001OUTPUT	C50A91_C50A52	50	Single	65	Single	0.060841	0.681226	2
BR130902TASK0001OUTPUT	C50A91_C50A52	50	Single	66	Single	-0.062294	0.670681	2
BR130902TASK0001OUTPUT	C50A91_C50A52	50	Single	7	Single	0.019607	0.893624	2
BR130902TASK0001OUTPUT	C50A91_C50A52	50	Single	74	Single	0.175445	0.227898	2
BR130902TASK0001OUTPUT	C50A91_C50A52	50	Single	8	Single	0.093569	0.522509	2
BR130902TASK0001OUTPUT	C50A91_C50A52	50	Single	81	Single	0.052321	0.721067	1
BR130902TASK0001OUTPUT	C50A91_C50A52	50	Single	9	Single	0.051511	0.725209	2
BR130902TASK0001OUTPUT	C50A91_C50A52	51	Single	52	Single	0.165933	0.25451	1
BR130902TASK0001OUTPUT	C50A91_C50A52	51	Single	53	Single	0.253739	0.0785373	1
BR130902TASK0001OUTPUT	C50A91_C50A52	51	Single	54	Single	0.146021	0.31676	1
BR130902TASK0001OUTPUT	C50A91_C50A52	51	Single	55	Single	0.181919	0.210925	1
BR130902TASK0001OUTPUT	C50A91_C50A52	51	Single	58	Single	0.173701	0.232627	1
BR130902TASK0001OUTPUT	C50A91_C50A52	51	Single	6	Single	-0.112722	0.440621	2
BR130902TASK0001OUTPUT	C50A91_C50A52	51	Single	65	Single	-0.038935	0.792755	2
BR130902TASK0001OUTPUT	C50A91_C50A52	51	Single	66	Single	0.196184	0.176694	2
BR130902TASK0001OUTPUT	C50A91_C50A52	51	Single	7	Single	0.26869	0.0619345	2
BR130902TASK0001OUTPUT	C50A91_C50A52	51	Single	74	Single	0.043951	0.764283	2
BR130902TASK0001OUTPUT	C50A91_C50A52	51	Single	8	Single	0.106388	0.466881	2
BR130902TASK0001OUTPUT	C50A91_C50A52	51	Single	81	Single	0.12296	0.399956	1
BR130902TASK0001OUTPUT	C50A91_C50A52	51	Single	9	Single	-0.113842	0.436063	2
BR130902TASK0001OUTPUT	C50A91_C50A52	52	Single	53	Single	-0.05546	0.705067	1
BR130902TASK0001OUTPUT	C50A91_C50A52	52	Single	54	Single	0.160366	0.271015	1
BR130902TASK0001OUTPUT	C50A91_C50A52	52	Single	55	Single	0.240747	0.0956478	1
BR130902TASK0001OUTPUT	C50A91_C50A52	52	Single	58	Single	0.0597	0.683658	1
BR130902TASK0001OUTPUT	C50A91_C50A52	52	Single	6	Single	-0.146873	0.313912	2
BR130902TASK0001OUTPUT	C50A91_C50A52	52	Single	65	Single	-0.002772	0.985081	2
BR130902TASK0001OUTPUT	C50A91_C50A52	52	Single	66	Single	-0.095602	0.513474	2
BR130902TASK0001OUTPUT	C50A91_C50A52	52	Single	7	Single	-0.09013	0.537976	2
BR130902TASK0001OUTPUT	C50A91_C50A52	52	Single	74	Single	0.070568	0.629932	2
BR130902TASK0001OUTPUT	C50A91_C50A52	52	Single	8	Single	-0.154873	0.287986	2
BR130902TASK0001OUTPUT	C50A91_C50A52	52	Single	81	Single	0.168313	0.247661	1
BR130902TASK0001OUTPUT	C50A91_C50A52	52	Single	9	Single	0.012978	0.929478	2
BR130902TASK0001OUTPUT	C50A91_C50A52	53	Single	54	Single	0.073414	0.616156	1
BR130902TASK0001OUTPUT	C50A91_C50A52	53	Single	55	Single	0.098925	0.498874	1
BR130902TASK0001OUTPUT	C50A91_C50A52	53	Single	58	Single	0.373378	0.0082297	1
BR130902TASK0001OUTPUT	C50A91_C50A52	53	Single	6	Single	0.020462	0.889013	2
BR130902TASK0001OUTPUT	C50A91_C50A52	53	Single	65	Single	-0.156062	0.289492	2
BR130902TASK0001OUTPUT	C50A91_C50A52	53	Single	66	Single	0.123555	0.39766	2
BR130902TASK0001OUTPUT	C50A91_C50A52	53	Single	7	Single	0.422154	0.00251596	2
BR130902TASK0001OUTPUT	C50A91_C50A52	53	Single	74	Single	0.123561	0.397639	2
BR130902TASK0001OUTPUT	C50A91_C50A52	53	Single	8	Single	0.038354	0.793597	2
BR130902TASK0001OUTPUT	C50A91_C50A52	53	Single	81	Single	0.106789	0.465195	1
BR130902TASK0001OUTPUT	C50A91_C50A52	53	Single	9	Single	0.020228	0.890277	2
BR130902TASK0001OUTPUT	C50A91_C50A52	54	Single	55	Single	0.102476	0.483512	1
BR130902TASK0001OUTPUT	C50A91_C50A52	54	Single	58	Single	-0.042011	0.77441	1
BR130902TASK0001OUTPUT	C50A91_C50A52	54	Single	6	Single	-0.074017	0.613252	2
BR130902TASK0001OUTPUT	C50A91_C50A52	54	Single	65	Single	-0.05825	0.694123	2
BR130902TASK0001OUTPUT	C50A91_C50A52	54	Single	66	Single	0.110636	0.449177	2
BR130902TASK0001OUTPUT	C50A91_C50A52	54	Single	7	Single	-0.033147	0.82112	2
BR130902TASK0001OUTPUT	C50A91_C50A52	54	Single	74	Single	-0.079228	0.588419	2
BR130902TASK0001OUTPUT	C50A91_C50A52	54	Single	8	Single	-0.011983	0.934873	2
BR130902TASK0001OUTPUT	C50A91_C50A52	54	Single	81	Single	0.280725	0.0507212	1
BR130902TASK0001OUTPUT	C50A91_C50A52	54	Single	9	Single	-0.082786	0.571723	2
BR130902TASK0001OUTPUT	C50A91_C50A52	55	Single	58	Single	0.124987	0.392171	1
BR130902TASK0001OUTPUT	C50A91_C50A52	55	Single	6	Single	0.056403	0.700284	2
BR130902TASK0001OUTPUT	C50A91_C50A52	55	Single	65	Single	-0.080602	0.586033	2
BR130902TASK0001OUTPUT	C50A91_C50A52	55	Single	66	Single	0.054519	0.709848	2
BR130902TASK0001OUTPUT	C50A91_C50A52	55	Single	7	Single	0.106655	0.465759	2
BR130902TASK0001OUTPUT	C50A91_C50A52	55	Single	74	Single	0.20312	0.16158	2
BR130902TASK0001OUTPUT	C50A91_C50A52	55	Single	8	Single	-0.008972	0.951212	2
BR130902TASK0001OUTPUT	C50A91_C50A52	55	Single	81	Single	0.171112	0.239772	1
BR130902TASK0001OUTPUT	C50A91_C50A52	55	Single	9	Single	0.18445	0.204536	2
BR130902TASK0001OUTPUT	C50A91_C50A52	58	Single	6	Single	0.166744	0.252161	2
BR130902TASK0001OUTPUT	C50A91_C50A52	58	Single	65	Single	-0.110621	0.454158	2
BR130902TASK0001OUTPUT	C50A91_C50A52	58	Single	66	Single	0.158973	0.275254	2
BR130902TASK0001OUTPUT	C50A91_C50A52	58	Single	7	Single	0.171938	0.237477	2
BR130902TASK0001OUTPUT	C50A91_C50A52	58	Single	74	Single	0.31151	0.029346	2
BR130902TASK0001OUTPUT	C50A91_C50A52	58	Single	8	Single	0.144665	0.321322	2
BR130902TASK0001OUTPUT	C50A91_C50A52	58	Single	81	Single	0.243361	0.0919909	1
BR130902TASK0001OUTPUT	C50A91_C50A52	58	Single	9	Single	-0.019493	0.894241	2
BR130902TASK0001OUTPUT	C50A91_C50A52	6	Single	65	Single	0.103445	0.484128	1
BR130902TASK0001OUTPUT	C50A91_C50A52	6	Single	66	Single	-0.014799	0.919609	1
BR130902TASK0001OUTPUT	C50A91_C50A52	6	Single	7	Single	-0.151271	0.299482	1
BR130902TASK0001OUTPUT	C50A91_C50A52	6	Single	74	Single	0.15249	0.295559	1
BR130902TASK0001OUTPUT	C50A91_C50A52	6	Single	8	Single	0.274079	0.05669	1
BR130902TASK0001OUTPUT	C50A91_C50A52	6	Single	81	Single	0.024119	0.869338	2
BR130902TASK0001OUTPUT	C50A91_C50A52	6	Single	9	Single	0.23211	0.108532	1
BR130902TASK0001OUTPUT	C50A91_C50A52	65	Single	66	Single	0.041288	0.780527	1
BR130902TASK0001OUTPUT	C50A91_C50A52	65	Single	7	Single	-0.181605	0.216708	1
BR130902TASK0001OUTPUT	C50A91_C50A52	65	Single	74	Single	-0.286527	0.0483356	1
BR130902TASK0001OUTPUT	C50A91_C50A52	65	Single	8	Single	0.185016	0.20805	1
BR130902TASK0001OUTPUT	C50A91_C50A52	65	Single	81	Single	0.040216	0.786092	2
BR130902TASK0001OUTPUT	C50A91_C50A52	65	Single	9	Single	0.259682	0.0746799	1
BR130902TASK0001OUTPUT	C50A91_C50A52	66	Single	7	Single	0.1036	0.478704	1
BR130902TASK0001OUTPUT	C50A91_C50A52	66	Single	74	Single	0.064231	0.661049	1
BR130902TASK0001OUTPUT	C50A91_C50A52	66	Single	8	Single	0.170647	0.241071	1
BR130902TASK0001OUTPUT	C50A91_C50A52	66	Single	81	Single	0.312893	0.0285968	2
BR130902TASK0001OUTPUT	C50A91_C50A52	66	Single	9	Single	-0.008082	0.956045	1
BR130902TASK0001OUTPUT	C50A91_C50A52	7	Single	74	Single	0.097614	0.50461	1
BR130902TASK0001OUTPUT	C50A91_C50A52	7	Single	8	Single	-0.004605	0.974948	1
BR130902TASK0001OUTPUT	C50A91_C50A52	7	Single	81	Single	-0.053511	0.714986	2
BR130902TASK0001OUTPUT	C50A91_C50A52	7	Single	9	Single	-0.078833	0.590285	1
BR130902TASK0001OUTPUT	C50A91_C50A52	74	Single	8	Single	0.239708	0.0971317	1
BR130902TASK0001OUTPUT	C50A91_C50A52	74	Single	81	Single	-0.125792	0.389107	2
BR130902TASK0001OUTPUT	C50A91_C50A52	74	Single	9	Single	-0.17181	0.237831	1
BR130902TASK0001OUTPUT	C50A91_C50A52	8	Single	81	Single	0.092966	0.525206	2
BR130902TASK0001OUTPUT	C50A91_C50A52	8	Single	9	Single	0.071897	0.62348	1
BR130902TASK0001OUTPUT	C50A91_C50A52	81	Single	9	Single	-0.04642	0.751453	2
ST140426TASK0001OUTPUT	C50A51_C50A92	1	Average	104	Single	0.122218	0.736607	2
ST140426TASK0001OUTPUT	C50A51_C50A92	1	Average	2	Average	0.523502	0.120438	1
ST140426TASK0001OUTPUT	C50A51_C50A92	1	Average	21	Single	-0.657559	0.0387943	2
ST140426TASK0001OUTPUT	C50A51_C50A92	1	Average	25	Single	-0.762283	0.0103668	2
ST140426TASK0001OUTPUT	C50A51_C50A92	1	Average	26	Single	-0.596643	0.068631	2
ST140426TASK0001OUTPUT	C50A51_C50A92	1	Average	27	Single	-0.432829	0.211515	2
ST140426TASK0001OUTPUT	C50A51_C50A92	1	Average	28	Single	-0.172215	0.634255	2
ST140426TASK0001OUTPUT	C50A51_C50A92	1	Average	29	Single	-0.254786	0.477449	2
ST140426TASK0001OUTPUT	C50A51_C50A92	1	Average	3	Single	0.327438	0.355711	1
ST140426TASK0001OUTPUT	C50A51_C50A92	1	Average	30	Average	0.300982	0.398074	2
ST140426TASK0001OUTPUT	C50A51_C50A92	1	Average	31	Single	0.018459	0.959635	2
ST140426TASK0001OUTPUT	C50A51_C50A92	1	Average	32	Single	-0.562201	0.0907247	2
ST140426TASK0001OUTPUT	C50A51_C50A92	1	Average	33	Single	0.24073	0.502874	2
ST140426TASK0001OUTPUT	C50A51_C50A92	1	Average	34	Single	-0.537136	0.109363	2
ST140426TASK0001OUTPUT	C50A51_C50A92	1	Average	35	Single	-0.110989	0.76018	2
ST140426TASK0001OUTPUT	C50A51_C50A92	1	Average	36	Single	-0.351759	0.318877	2
ST140426TASK0001OUTPUT	C50A51_C50A92	1	Average	4	Single	0.080036	0.826039	1
ST140426TASK0001OUTPUT	C50A51_C50A92	1	Average	42	Average	0.133393	0.713341	1
ST140426TASK0001OUTPUT	C50A51_C50A92	1	Average	47	Average	0.012549	0.972554	1
ST140426TASK0001OUTPUT	C50A51_C50A92	1	Average	58	Single	-0.157941	0.662995	2
ST140426TASK0001OUTPUT	C50A51_C50A92	1	Average	59	Single	-0.472651	0.16774	2
ST140426TASK0001OUTPUT	C50A51_C50A92	1	Average	6	Average	0.855803	0.00158347	1
ST140426TASK0001OUTPUT	C50A51_C50A92	1	Average	60	Single	-0.630389	0.0507184	2
ST140426TASK0001OUTPUT	C50A51_C50A92	1	Average	63	Single	-0.393737	0.260265	2
ST140426TASK0001OUTPUT	C50A51_C50A92	1	Average	64	Single	-0.531364	0.11397	2
ST140426TASK0001OUTPUT	C50A51_C50A92	1	Average	65	Single	-0.096702	0.790432	2
ST140426TASK0001OUTPUT	C50A51_C50A92	1	Average	66	Single	-0.649667	0.0420391	2
ST140426TASK0001OUTPUT	C50A51_C50A92	1	Average	67	Single	0.054969	0.880119	2
ST140426TASK0001OUTPUT	C50A51_C50A92	1	Average	68	Single	-0.684985	0.0288381	2
ST140426TASK0001OUTPUT	C50A51_C50A92	1	Average	69	Single	-0.081472	0.822957	2
ST140426TASK0001OUTPUT	C50A51_C50A92	1	Average	70	Single	0.534673	0.111315	1
ST140426TASK0001OUTPUT	C50A51_C50A92	1	Average	71	Single	0.517107	0.125864	1
ST140426TASK0001OUTPUT	C50A51_C50A92	1	Average	73	Single	0.524844	0.119318	1
ST140426TASK0001OUTPUT	C50A51_C50A92	1	Average	74	Single	0.200712	0.578207	1
ST140426TASK0001OUTPUT	C50A51_C50A92	1	Average	75	Average	0.26572	0.45807	1
ST140426TASK0001OUTPUT	C50A51_C50A92	1	Average	79	Average	-0.133	0.714155	1
ST140426TASK0001OUTPUT	C50A51_C50A92	1	Average	8	Average	-0.309006	0.384978	1
ST140426TASK0001OUTPUT	C50A51_C50A92	1	Average	95	Single	-0.132319	0.715567	2
ST140426TASK0001OUTPUT	C50A51_C50A92	1	Average	96	Single	0.11716	0.747201	2
ST140426TASK0001OUTPUT	C50A51_C50A92	1	Average	98	Single	0.171508	0.635668	2
ST140426TASK0001OUTPUT	C50A51_C50A92	104	Single	2	Average	0.28082	0.4319	2
ST140426TASK0001OUTPUT	C50A51_C50A92	104	Single	21	Single	0.306285	0.389395	1
ST140426TASK0001OUTPUT	C50A51_C50A92	104	Single	25	Single	0.090235	0.804209	1
ST140426TASK0001OUTPUT	C50A51_C50A92	104	Single	26	Single	0.365159	0.299475	1
ST140426TASK0001OUTPUT	C50A51_C50A92	104	Single	27	Single	0.053204	0.883945	1
ST140426TASK0001OUTPUT	C50A51_C50A92	104	Single	28	Single	-0.220706	0.540043	1
ST140426TASK0001OUTPUT	C50A51_C50A92	104	Single	29	Single	-0.042867	0.906401	1
ST140426TASK0001OUTPUT	C50A51_C50A92	104	Single	3	Single	0.016548	0.963812	2
ST140426TASK0001OUTPUT	C50A51_C50A92	104	Single	30	Average	0.279816	0.433619	1
ST140426TASK0001OUTPUT	C50A51_C50A92	104	Single	31	Single	0.008929	0.98047	1
ST140426TASK0001OUTPUT	C50A51_C50A92	104	Single	32	Single	0.072517	0.8422	1
ST140426TASK0001OUTPUT	C50A51_C50A92	104	Single	33	Single	-0.213767	0.553173	1
ST140426TASK0001OUTPUT	C50A51_C50A92	104	Single	34	Single	0.05912	0.871127	1
ST140426TASK0001OUTPUT	C50A51_C50A92	104	Single	35	Single	-0.286327	0.422533	1
ST140426TASK0001OUTPUT	C50A51_C50A92	104	Single	36	Single	-0.000995	0.997823	1
ST140426TASK0001OUTPUT	C50A51_C50A92	104	Single	4	Single	0.167759	0.643181	2
ST140426TASK0001OUTPUT	C50A51_C50A92	104	Single	42	Average	0.365629	0.298805	2
ST140426TASK0001OUTPUT	C50A51_C50A92	104	Single	47	Average	-0.479514	0.160797	2
ST140426TASK0001OUTPUT	C50A51_C50A92	104	Single	58	Single	0.149964	0.679232	1
ST140426TASK0001OUTPUT	C50A51_C50A92	104	Single	59	Single	-0.406197	0.244109	1
ST140426TASK0001OUTPUT	C50A51_C50A92	104	Single	6	Average	0.120023	0.741199	2
ST140426TASK0001OUTPUT	C50A51_C50A92	104	Single	60	Single	0.277617	0.437393	1
ST140426TASK0001OUTPUT	C50A51_C50A92	104	Single	63	Single	-0.124323	0.732207	1
ST140426TASK0001OUTPUT	C50A51_C50A92	104	Single	64	Single	-0.150669	0.677792	1
ST140426TASK0001OUTPUT	C50A51_C50A92	104	Single	65	Single	-0.108554	0.765317	1
ST140426TASK0001OUTPUT	C50A51_C50A92	104	Single	66	Single	-0.017689	0.961316	1
ST140426TASK0001OUTPUT	C50A51_C50A92	104	Single	67	Single	-0.109309	0.763723	1
ST140426TASK0001OUTPUT	C50A51_C50A92	104	Single	68	Single	0.13036	0.719634	1
ST140426TASK0001OUTPUT	C50A51_C50A92	104	Single	69	Single	0.102216	0.778723	1
ST140426TASK0001OUTPUT	C50A51_C50A92	104	Single	70	Single	-0.128433	0.723642	2
ST140426TASK0001OUTPUT	C50A51_C50A92	104	Single	71	Single	0.164124	0.650494	2
ST140426TASK0001OUTPUT	C50A51_C50A92	104	Single	73	Single	-0.067291	0.853466	2
ST140426TASK0001OUTPUT	C50A51_C50A92	104	Single	74	Single	-0.238301	0.507324	2
ST140426TASK0001OUTPUT	C50A51_C50A92	104	Single	75	Average	-0.097266	0.789232	2
ST140426TASK0001OUTPUT	C50A51_C50A92	104	Single	79	Average	0.405791	0.244625	2
ST140426TASK0001OUTPUT	C50A51_C50A92	104	Single	8	Average	0.172591	0.633505	2
ST140426TASK0001OUTPUT	C50A51_C50A92	104	Single	95	Single	0.017703	0.961287	1
ST140426TASK0001OUTPUT	C50A51_C50A92	104	Single	96	Single	0.245575	0.494047	1
ST140426TASK0001OUTPUT	C50A51_C50A92	104	Single	98	Single	0.064925	0.858574	1
ST140426TASK0001OUTPUT	C50A51_C50A92	2	Average	21	Single	-0.322139	0.364007	2
ST140426TASK0001OUTPUT	C50A51_C50A92	2	Average	25	Single	-0.372584	0.289002	2
ST140426TASK0001OUTPUT	C50A51_C50A92	2	Average	26	Single	-0.112982	0.755982	2
ST140426TASK0001OUTPUT	C50A51_C50A92	2	Average	27	Single	-0.072144	0.843003	2
ST140426TASK0001OUTPUT	C50A51_C50A92	2	Average	28	Single	-0.333757	0.345942	2
[truncated: 28,210 more rows]
