# Supplementary material for: Coordinated multiplexing of information about separate objects in visual cortex
Source: eLife journal article supplement (doi:10.7554/elife.76452), 2022-10-24
Supplement: data1 [file condition_counts.xls]

## Sheet: Sheet1
	nA or B				nAB				nAB
	mean	std	min	max	mean	std	min	max	mean	std	min	max
spread_adjV1	20.9706	12.2924	6	56	17.8235	12.7623	6	59	17.8235	12.7623	6	59
spread_adjV4	72.8163	30.2513	5	136	72.2245	30.6589	6	132	72.2245	30.6589	6	132
spread_superV1	25.4068	15.4318	7	74	23.3051	12.1418	7	64	23.3051	12.1418	7	64
spread_superV4	131.344	42.0108	20	196	184.519	64.6164	20	270	184.519	64.6164	20	270
