# Supplementary figures and images for: Coordinated multiplexing of information about separate objects in visual cortex
Source: eLife journal article supplement (doi:10.7554/elife.76452), 2022-10-24

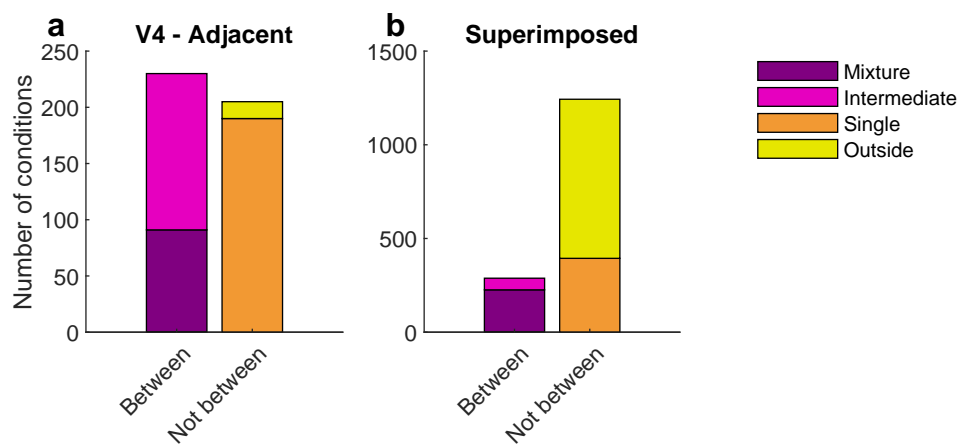

Supplement: data1 [file V4_whole_color_bar_plot_May2022.pdf › SourceData2022/plots_and_outputs/V4_whole_color_bar_plot_May2022.pdf]

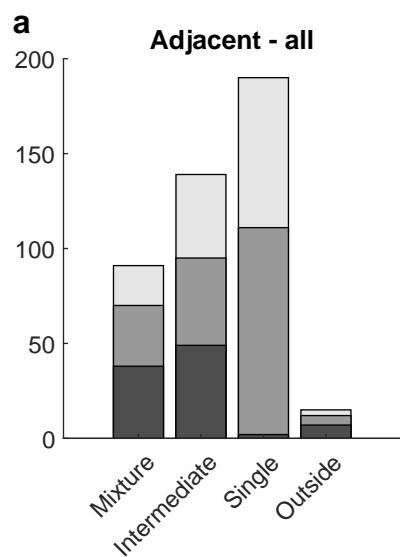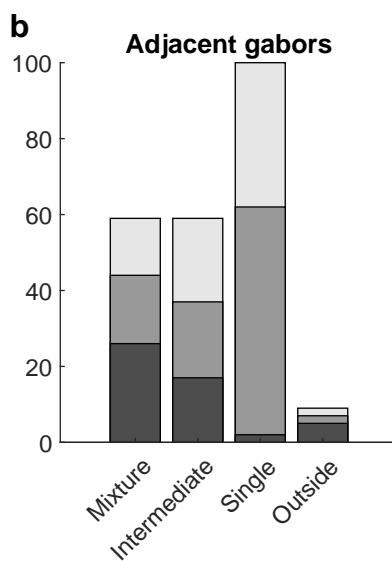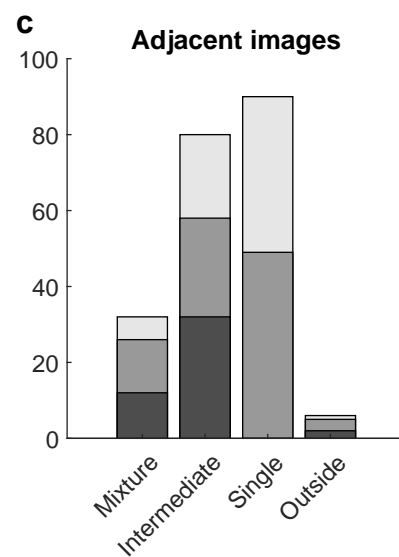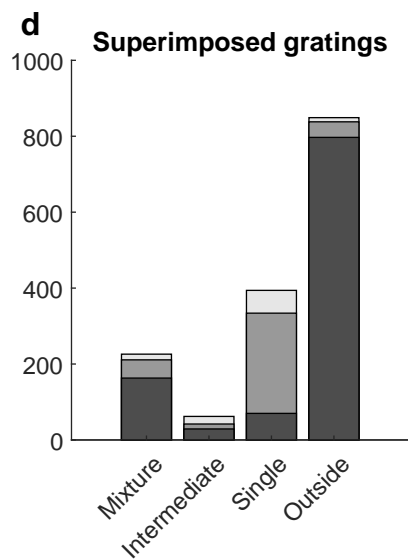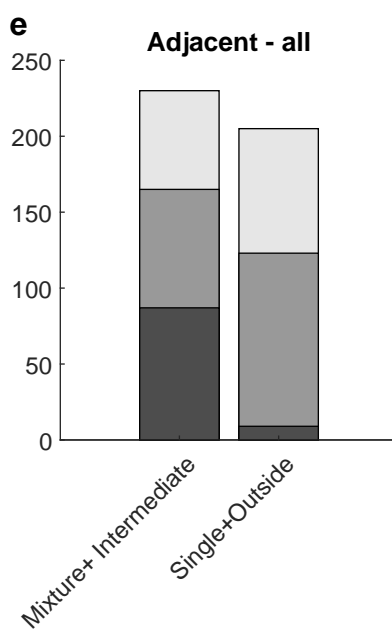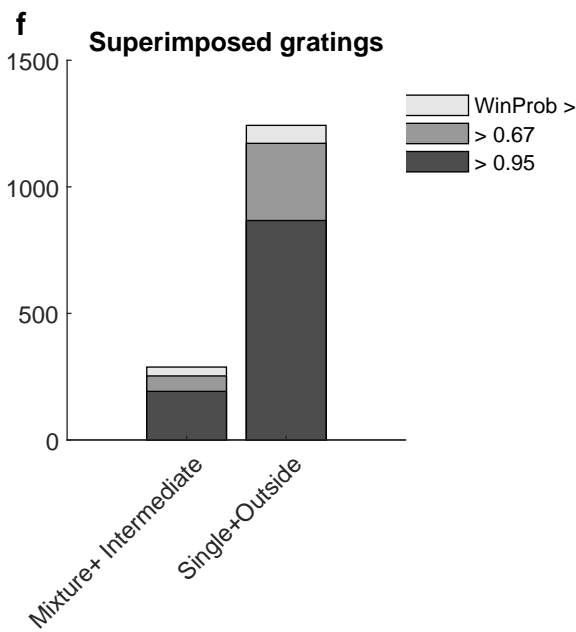

Supplement: data1 [file V4_whole_complete_May2022.pdf › SourceData2022/plots_and_outputs/V4_whole_complete_May2022.pdf]

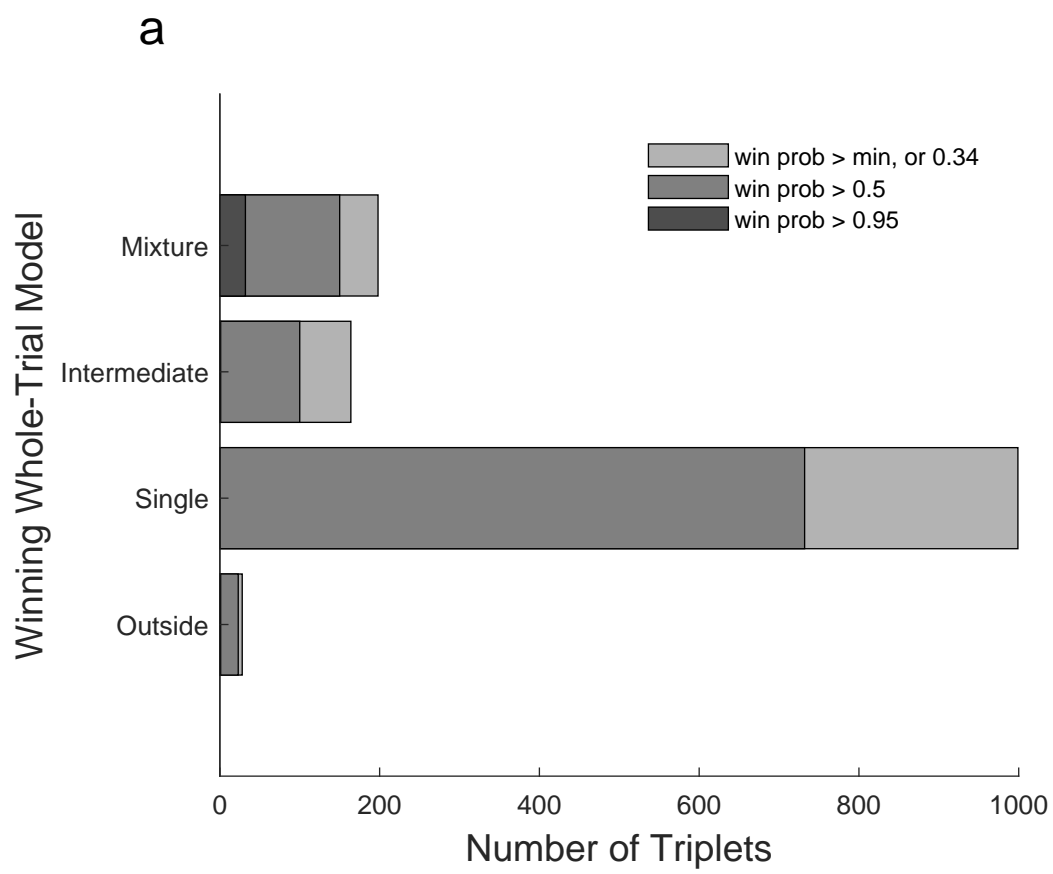

Supplement: data1 [file adjacent_v1.pdf › SourceData2022/plots_and_outputs/adjacent_v1.pdf]

**N = 306 1083**

WinPr > 0.67

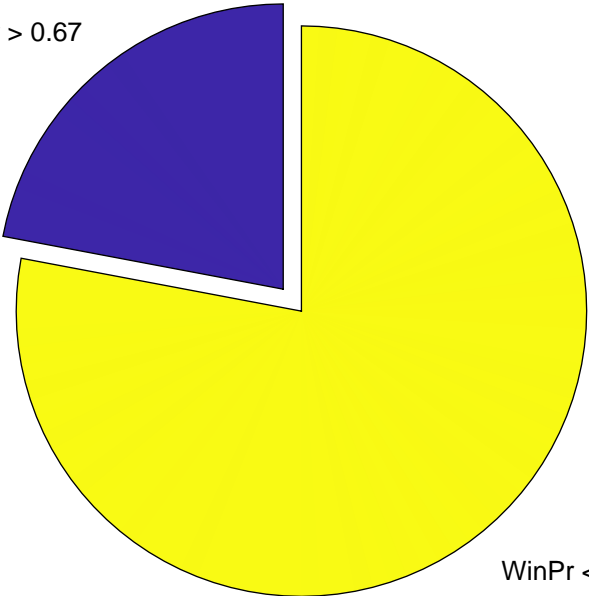

WinPr < 0.67

Supplement: data1 [file adjacent_v1.pdf_pie.pdf › SourceData2022/plots_and_outputs/adjacent_v1.pdf_pie.pdf]

a

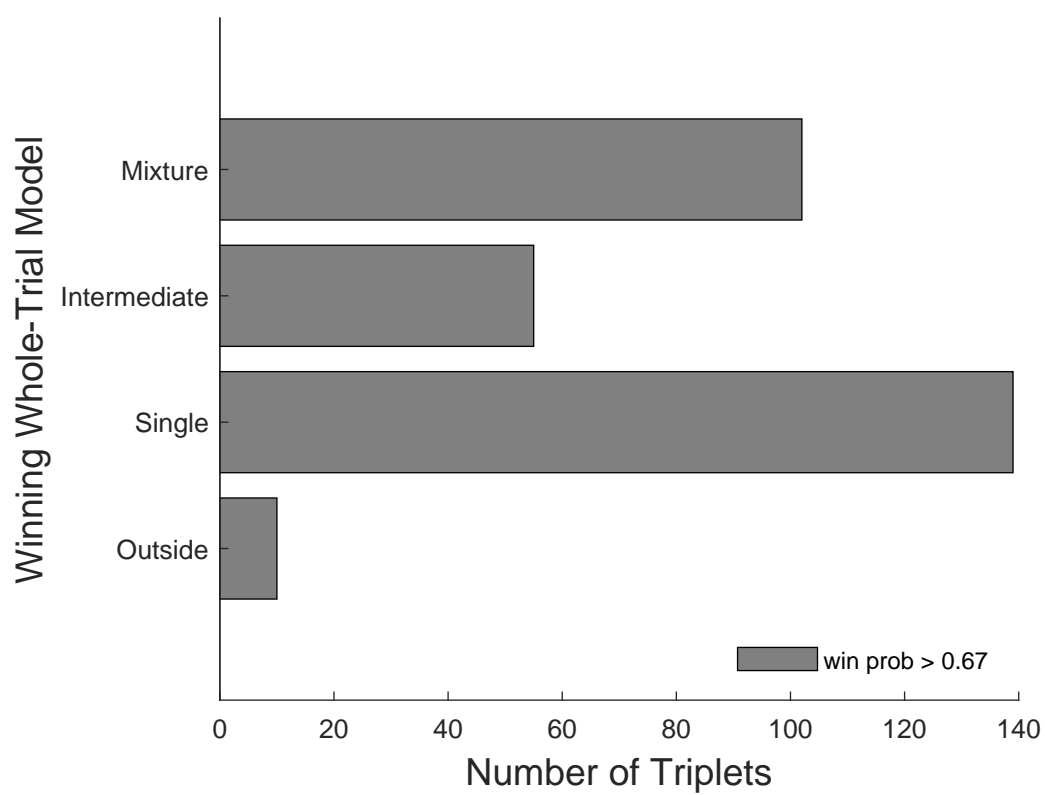

Supplement: data1 [file adjacent_v1.pdf_singlecrit.pdf › SourceData2022/plots_and_outputs/adjacent_v1.pdf_singlecrit.pdf]

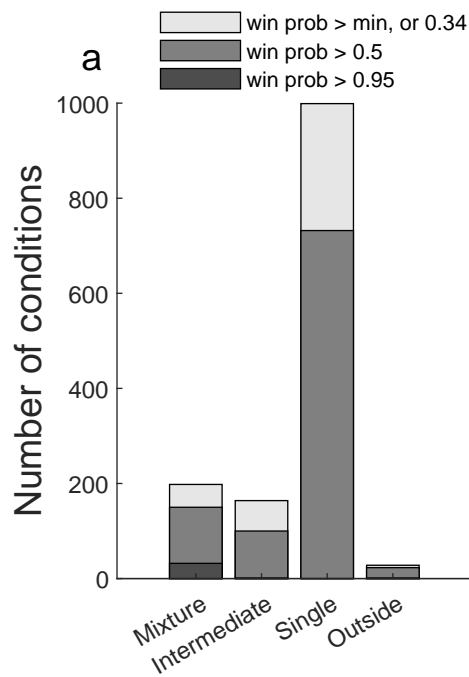

Winning Whole-Trial Model

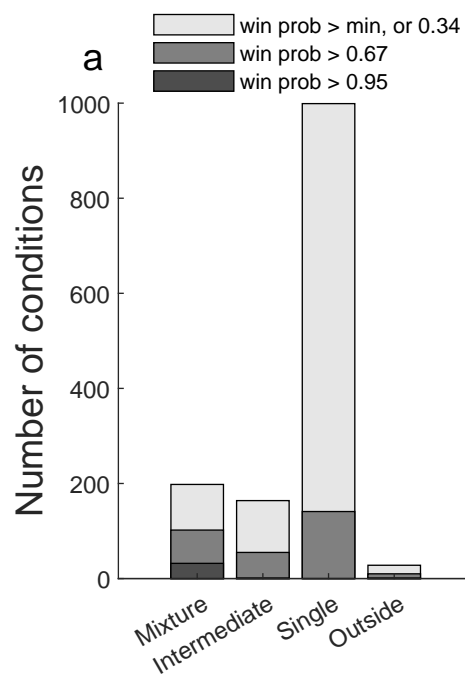

Winning Whole-Trial Model

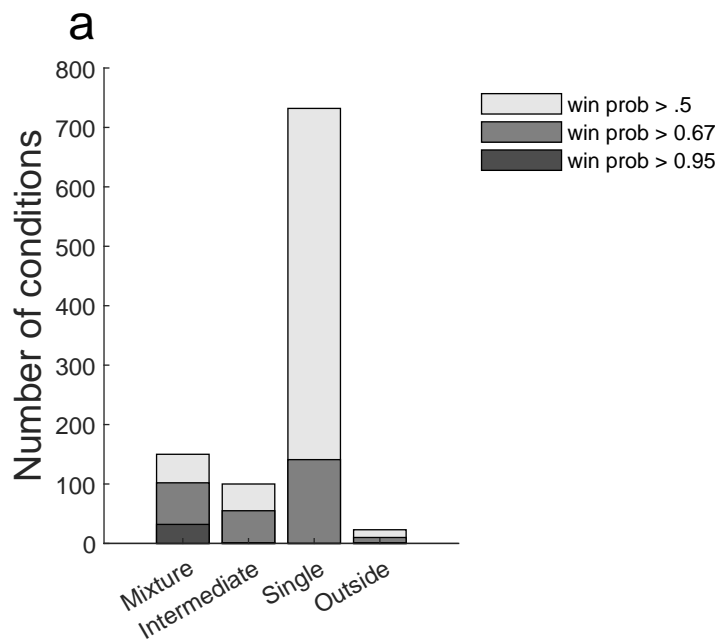

Winning Whole-Trial Model

Supplement: data1 [file adjacent_v1.pdf_vert.pdf › SourceData2022/plots_and_outputs/adjacent_v1.pdf_vert.pdf]

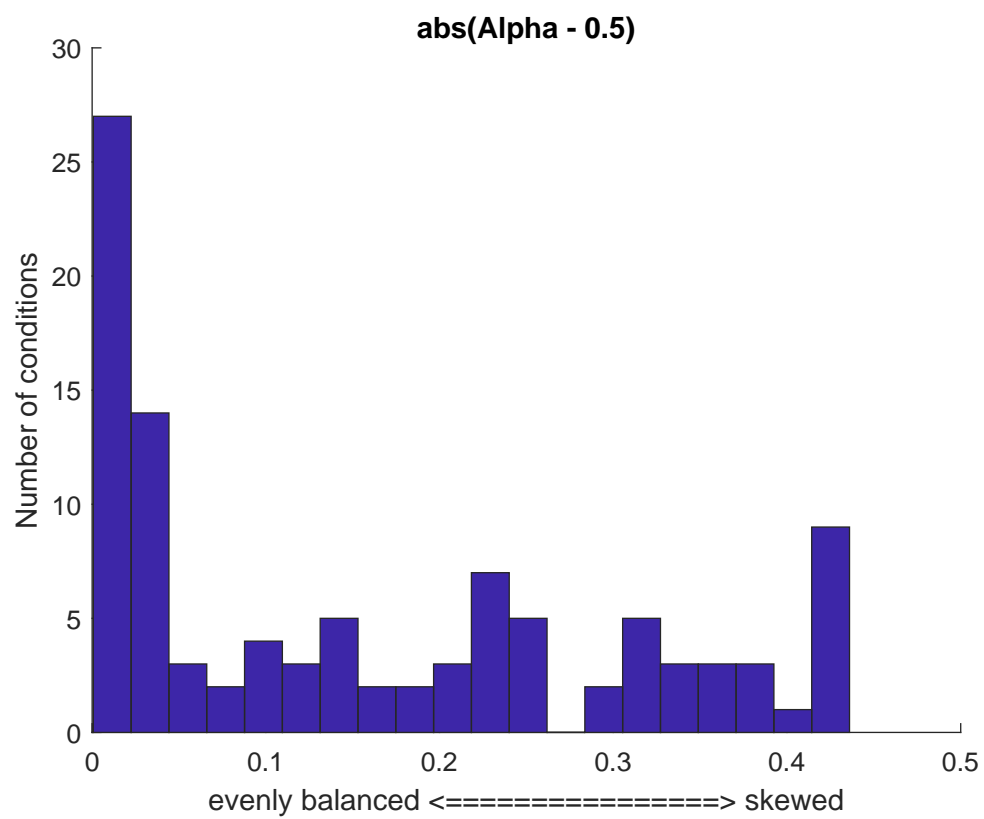

Supplement: data1 [file alpha_distributions.pdf › SourceData2022/plots_and_outputs/alpha_distributions.pdf]

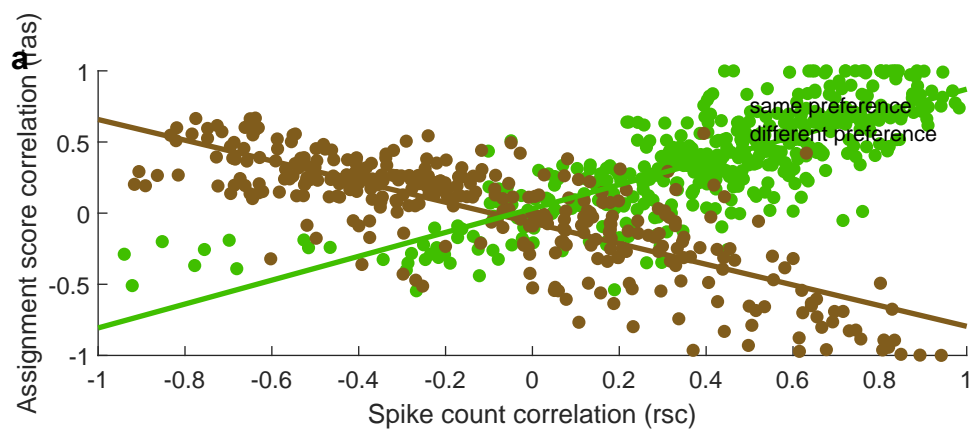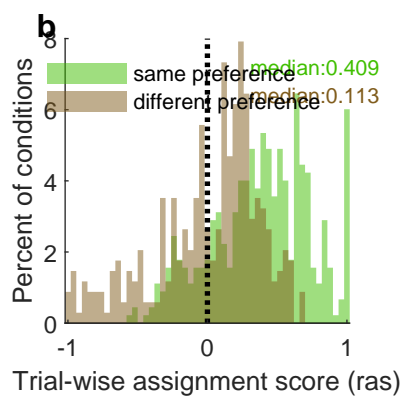

Supplement: data1 [file assignment_scoreMay2022_latency.pdf › SourceData2022/plots_and_outputs/assignment_scoreMay2022_latency.pdf]

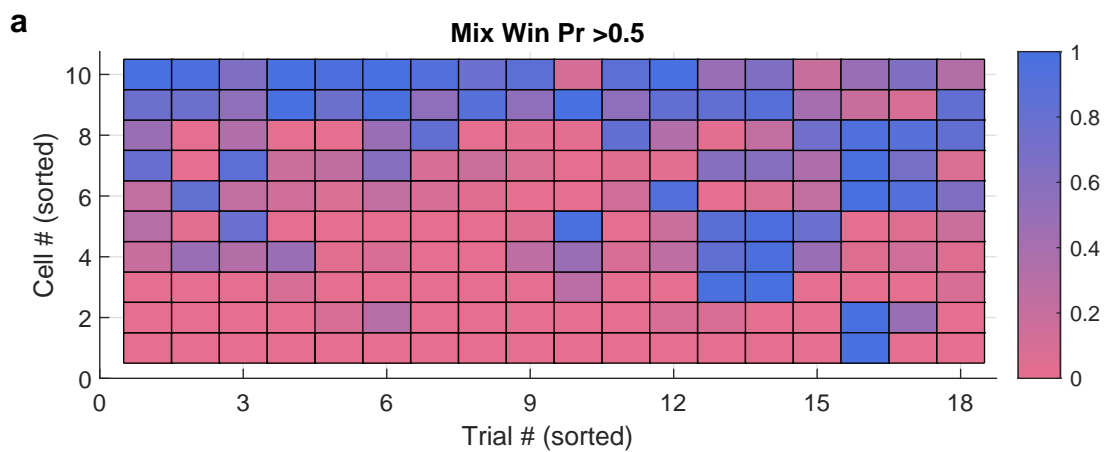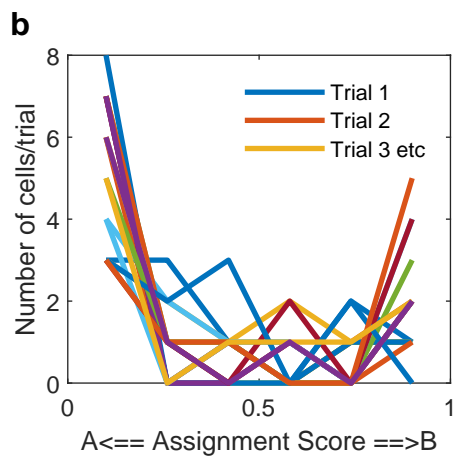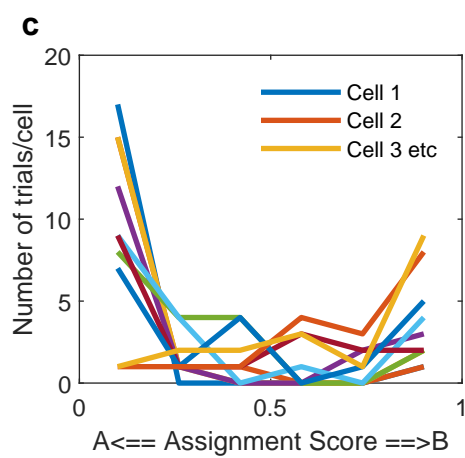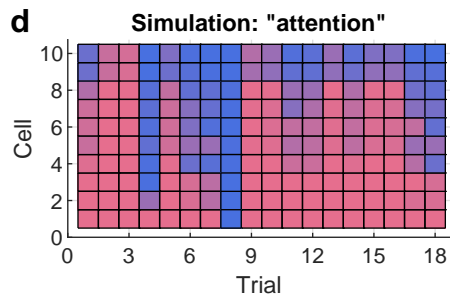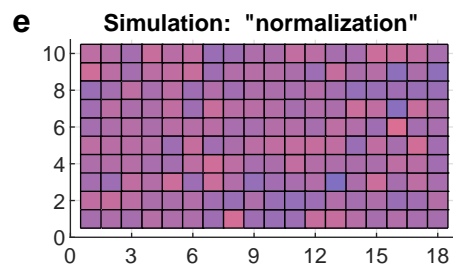

Supplement: data1 [file assignment_score_population_by_trial.pdf › SourceData2022/plots_and_outputs/assignment_score_population_by_trial.pdf]

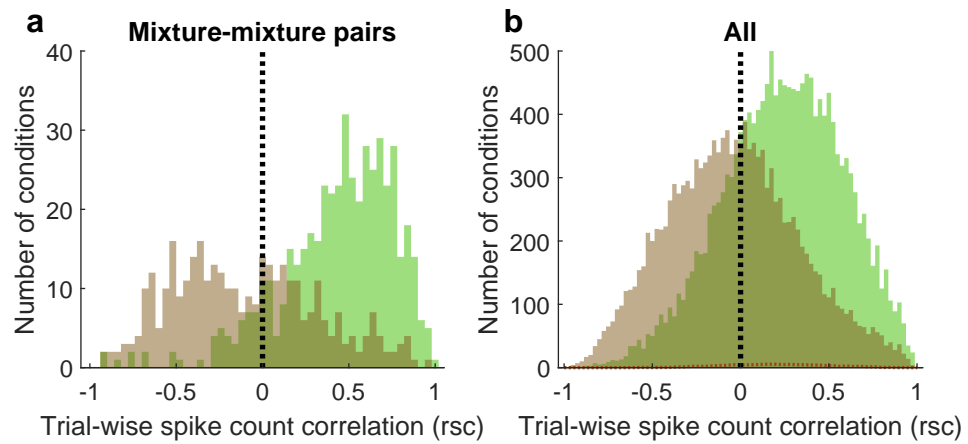

Supplement: data1 [file non_normalized_same_diff.pdf › SourceData2022/plots_and_outputs/non_normalized_same_diff.pdf]

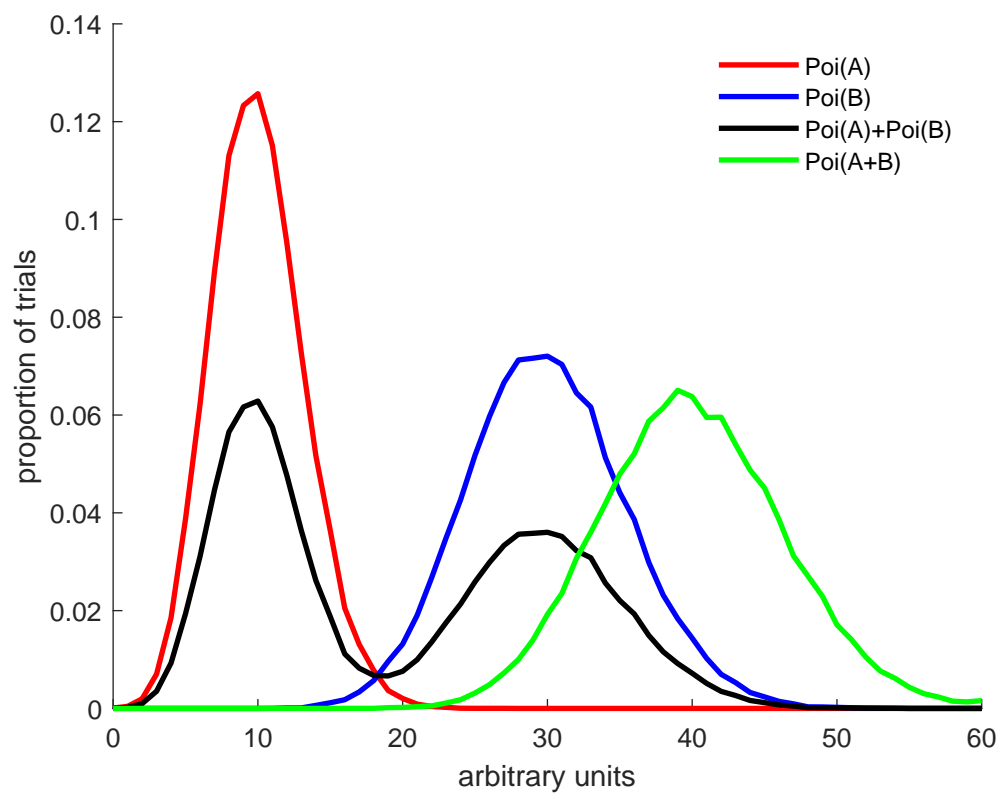

Supplement: data1 [file poisson_for_reviewers.pdf › SourceData2022/plots_and_outputs/poisson_for_reviewers.pdf]

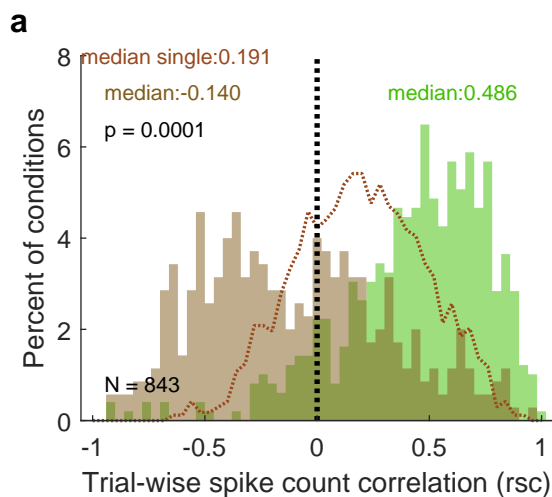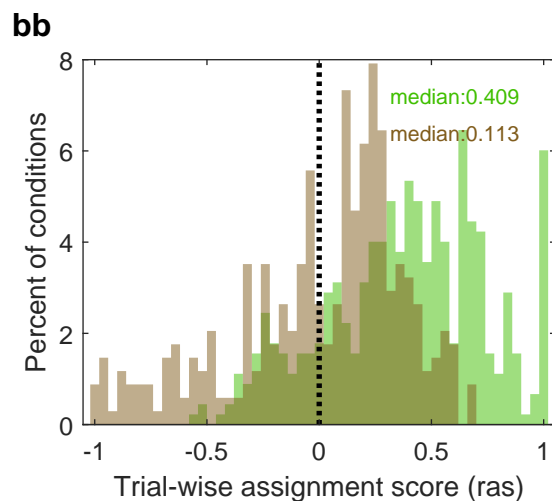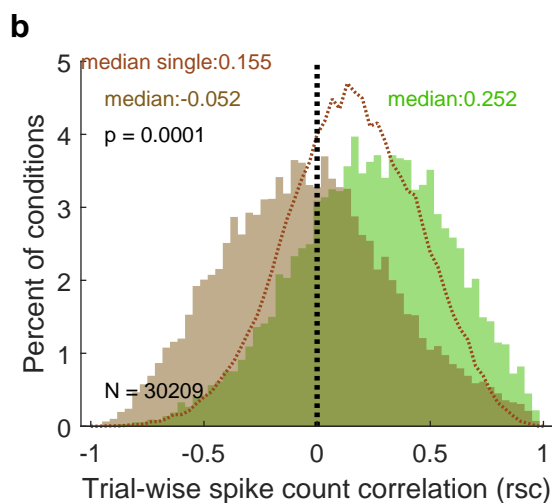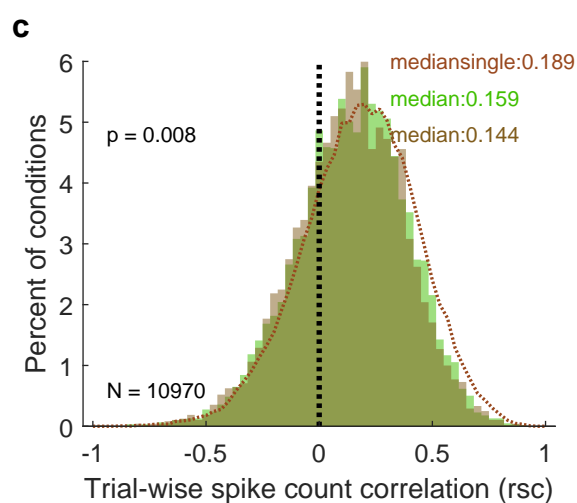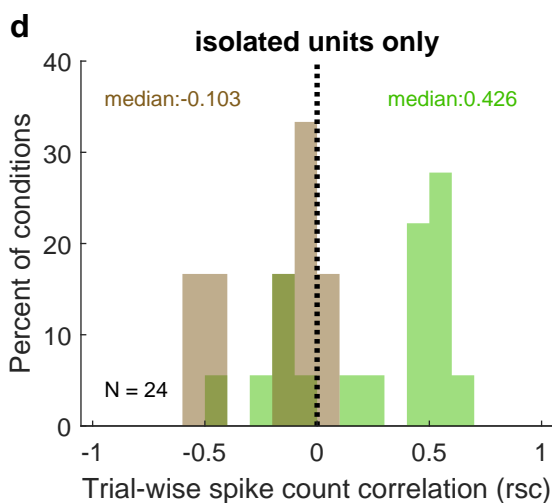

same preference  
different preference  
singles

Supplement: data1 [file results_figure_with_mixtures_rearrange_May2022_latency.pdf › SourceData2022/plots_and_outputs/results_figure_with_mixtures_rearrange_May2022_latency.pdf]

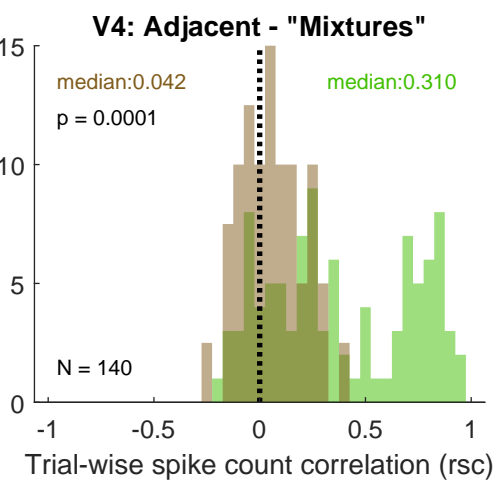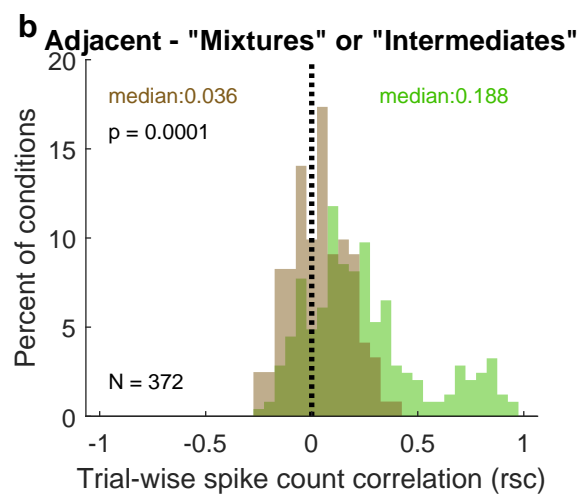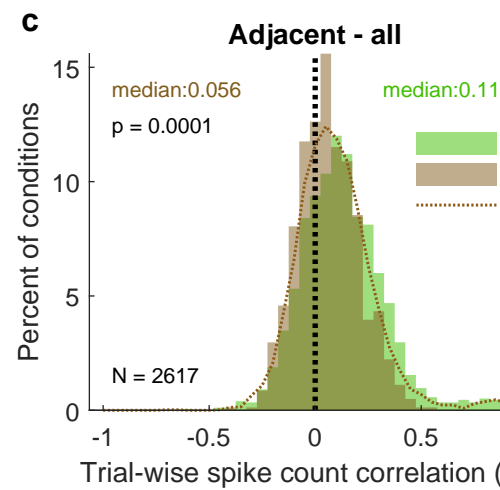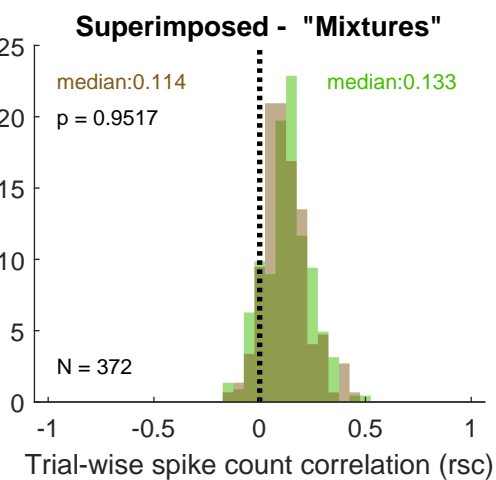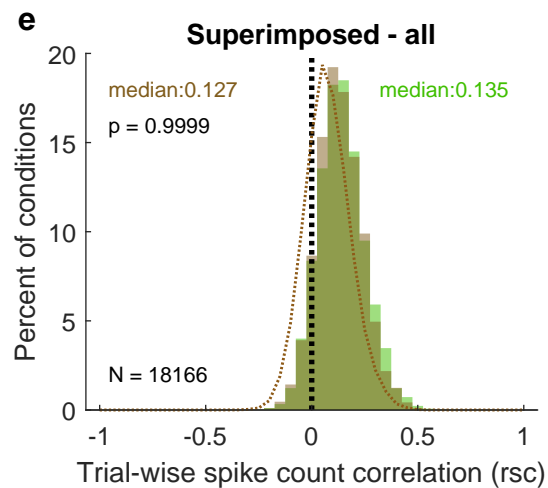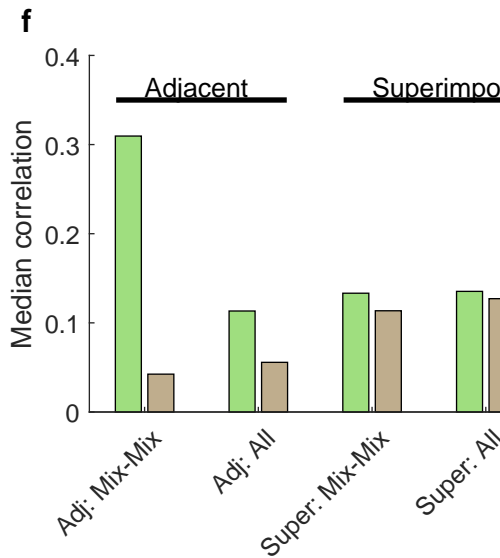

Supplement: data1 [file results_with_mixtures_V4_rsc_gabor_and_image.pdf › SourceData2022/plots_and_outputs/results_with_mixtures_V4_rsc_gabor_and_image.pdf]

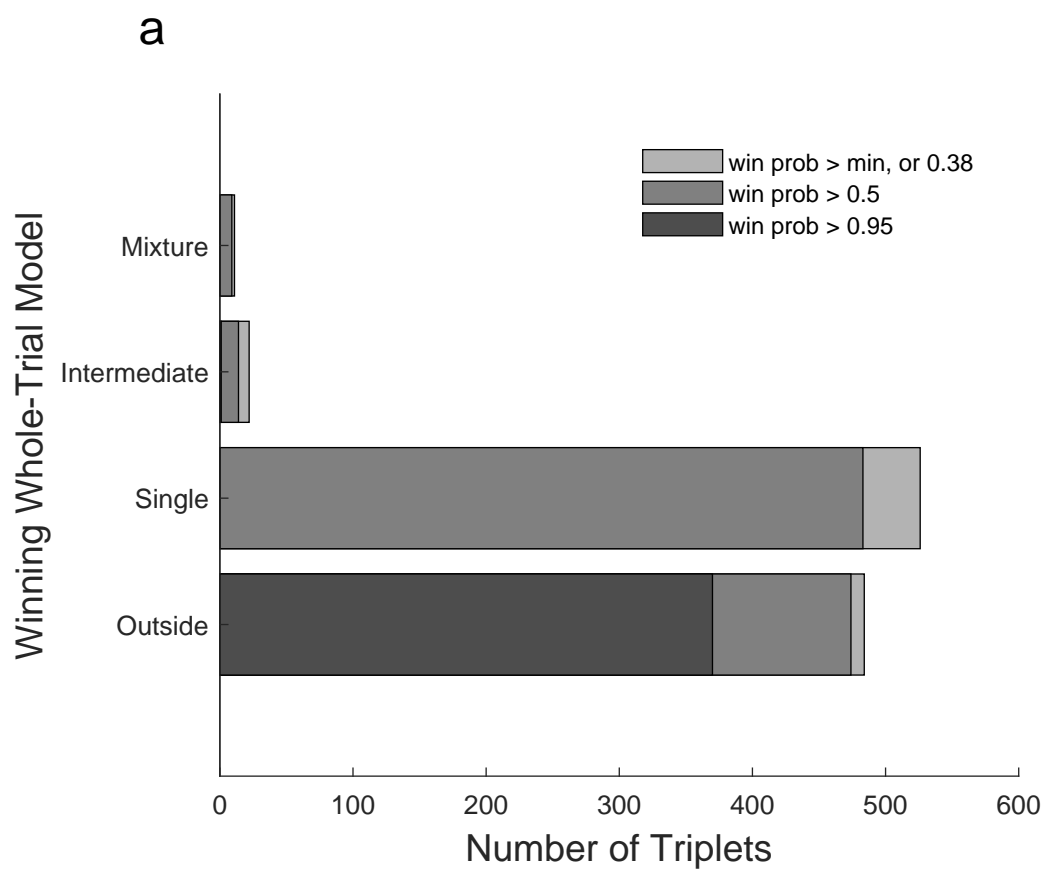

Supplement: data1 [file superimposed_v1_30_230.pdf › SourceData2022/plots_and_outputs/superimposed_v1_30_230.pdf]

**N = 667 376**

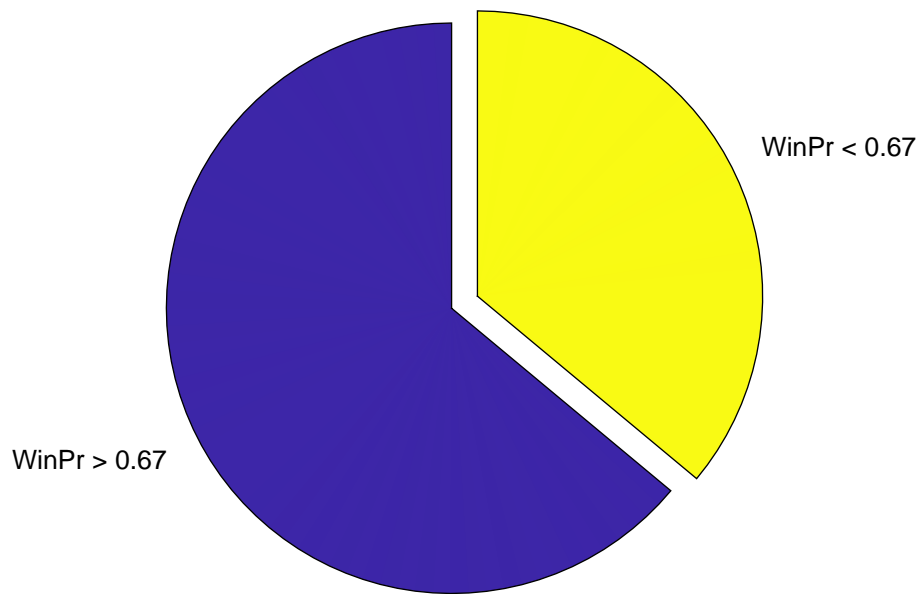

Supplement: data1 [file superimposed_v1_30_230.pdf_pie.pdf › SourceData2022/plots_and_outputs/superimposed_v1_30_230.pdf_pie.pdf]

a

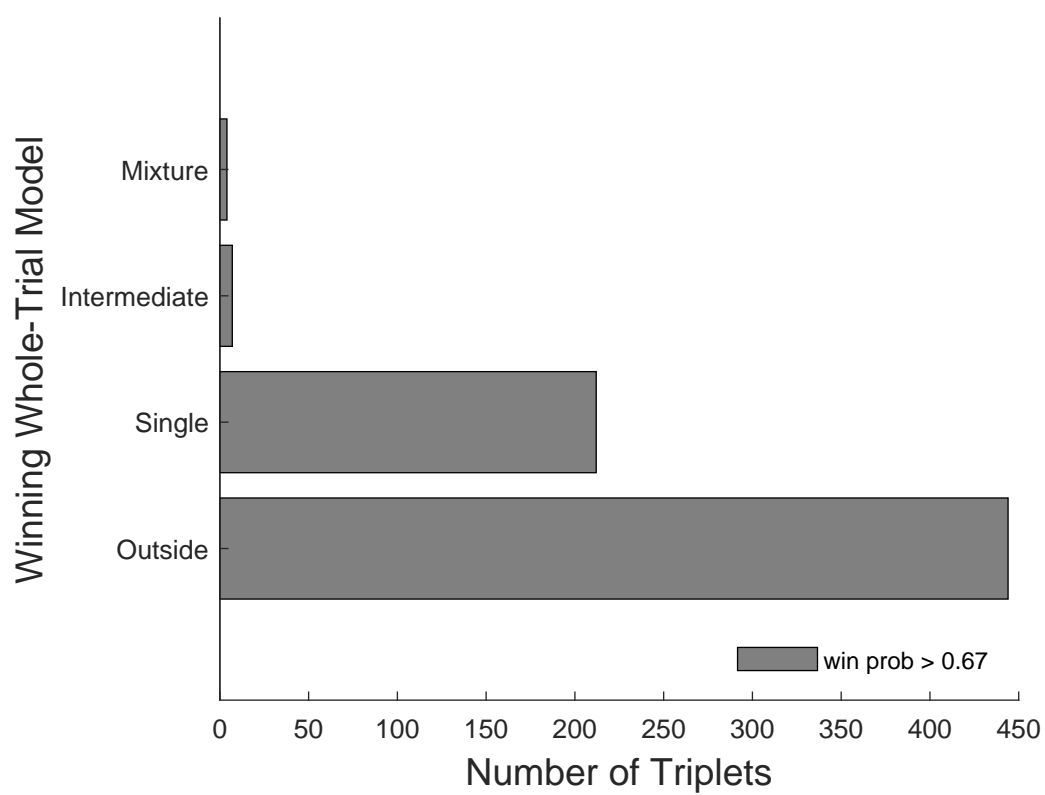

Supplement: data1 [file superimposed_v1_30_230.pdf_singlecrit.pdf › SourceData2022/plots_and_outputs/superimposed_v1_30_230.pdf_singlecrit.pdf]

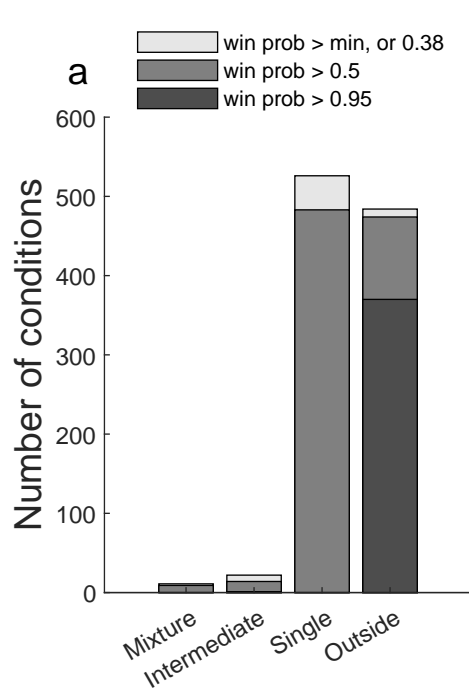

Winning Whole-Trial Model

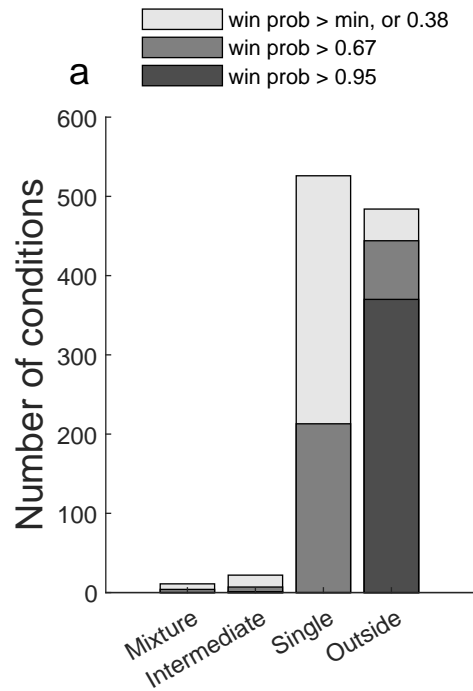

Winning Whole-Trial Model

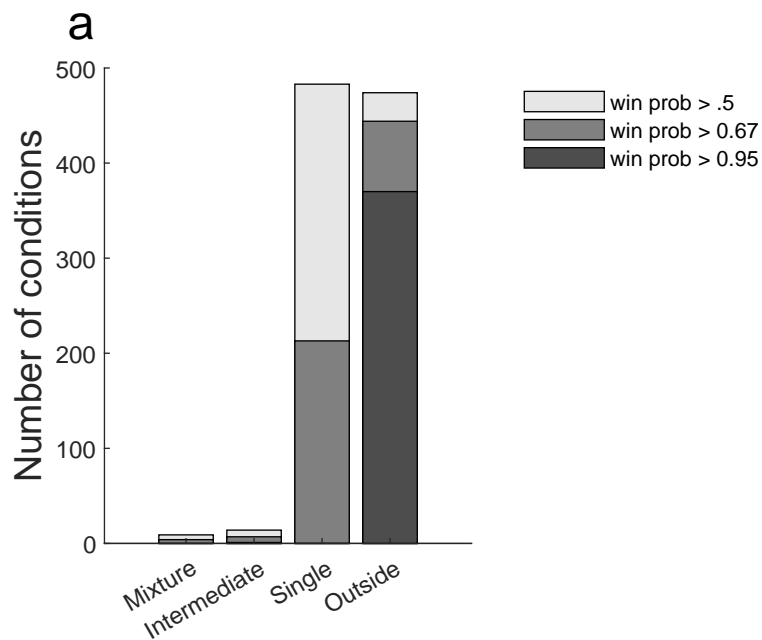

Winning Whole-Trial Model

Supplement: data1 [file superimposed_v1_30_230.pdf_vert.pdf › SourceData2022/plots_and_outputs/superimposed_v1_30_230.pdf_vert.pdf]

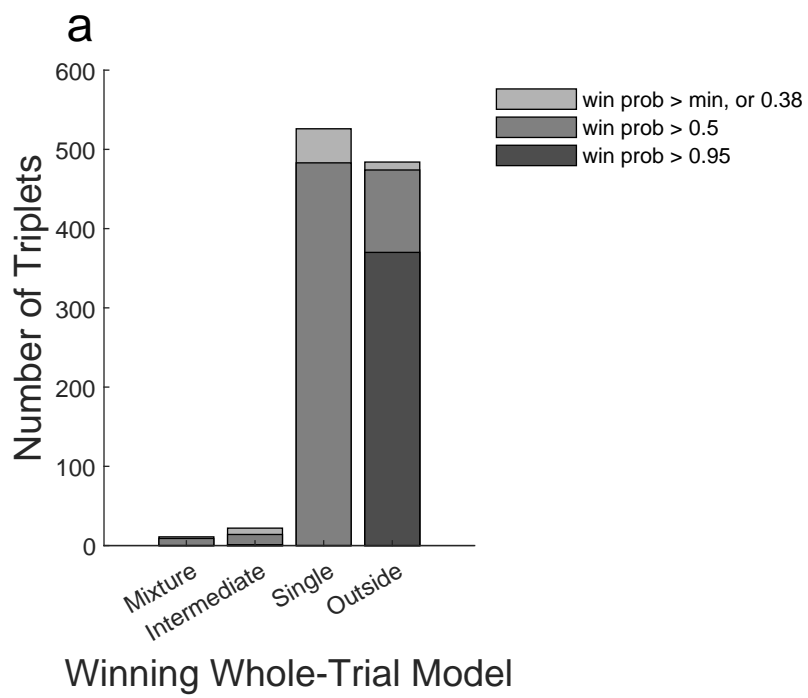

Supplement: data1 [file superimposed_v1_30_230_vert.pdf › SourceData2022/plots_and_outputs/superimposed_v1_30_230_vert.pdf]
